# Supplementary material for: Exploring the mechanism of Naringenin in the treatment of hepatocellular carcinoma based on mRNA sequencing and experimental validation
Source: Research Square preprint supplement (doi:10.21203/rs.3.rs-5403136/v1), 2025-04-21
Supplement: Supplementary file 1 [file e2982c81c256c3ab51dba79e.xlsx]

## Sheet: sequencing
EGR1
DHRS2
TOGARAM2
ETV5
C11orf86
FABP3
TNS4
HPDL
KRT7
HSPB1
CLIC3
FOXN1
SAMD11
SLC12A3
GADD45A
ENDOD1
ENO3
CDA
NIBAN1
PTDSS2
TMEM87B
CD24
CRABP2
LMO1
FZD1
DUSP6
SPRY4
CAPN5
S100A4
CSRNP2
BIRC7
FAM222A
GCC1
GAMT
NOG
DOP1B
FOXQ1
IFFO2
MAB21L4
C14orf180
KCND1
FZD7
FAM167A
CCN5
SLC39A10
CPS1
AQP3
SERTAD1
TCEA3
IFITM2
SRXN1
SLC30A1
CSTA
GDF15
ASNS
IDS
ANKRD33B
TMX4
SFN
DNAJB9
EPS8L2
SLC6A17
HYOU1
EEF1A2
ZNF697
CCDC28B
S100A3
EMP3
LGMN
SERPINI1
WNT10B
PLEKHB2
SLC25A1
HBEGF
ID3
GALNT10
SUSD6
EFNB2
NECTIN1
SNX29
PRMT1
RNF19B
STX11
SLC16A14
ANXA8L1
MISP
TRAF1
MCRIP2
EPS8L3
NRIP3
GABRE
CRYBG2
NTHL1
ZNF219
HRCT1
BORCS6
SESN2
ADSS1
GLIPR2
MYOM3
CSF2RA
HID1
COL9A2
KHDRBS3
TJP3
WIPF1
PDK4
TNFRSF10B
SH2B3
CORO6
C2CD4C
NOXA1
DUSP9
B4GALT2
SLC2A5
SRD5A3
TMEM102
DUSP5
ZCCHC24
BEGAIN
CD58
SDC4
SNORC
VEGFB
TNFRSF9
AC023055.1
EGLN1
IER5L
METTL26
CNGB1
MAOB
PGM1
RARG
NPTX1
B4GALNT4
LGALS1
RNF224
PPP1R14C
ELAPOR1
PCTP
QRICH2
TVP23A
SLC29A2
MYO1A
ADAMTS10
WDR18
P4HA2
ZNF275
EGR2
TYMP
MCM3
LRRC26
DNAJC30
MRPL12
RBM15
S100A10
WIPI1
CRIP2
FSTL4
PPP1R35
HS6ST1
CYB5R2
TNS1
CPNE7
TNXB
HAGHL
CILK1
USP18
VIT
TNFAIP8L1
MICAL2
CREG2
TMEM256
PPP1R15A
FBXO2
MATK
QSOX1
TXNRD2
FOSL1
MUC3A
MAP7
CHST13
MPST
NT5DC2
NGEF
LGR6
RAB42
ANXA8
HNRNPDL
ELFN2
SDHAF4
FAM234B
ALDH3A1
MLEC
C19orf33
SLC25A10
NPL
HNF4A
NOTCH3
SELENOS
DBP
VWA5A
ARFGEF3
FLVCR2
CHRNA7
TEX261
TOR1B
C9orf116
ATP8B2
NR1D1
MAN1C1
CYP4F11
LRRC8B
FGFR1
FAM43A
CISD3
C6orf223
RAB20
PTPRA
MVP
EXT1
SCAND1
DYNLL2
HES7
C16orf72
NME4
DDIT3
TSPO
MYO1G
ARG2
ZMYM3
CKB
GLB1
SYT12
PTOV1
MARCHF3
EFNA1
GPAT4
MYO15B
DNAJB11
NT5C
SCN3B
EFNB1
DDAH1
GPAT3
NIPAL3
NOTUM
KRT18
TAF13
BLOC1S4
PRKAR1B
SAC3D1
FAM53C
DPM3
PAG1
GALNT18
CCDC24
PI4K2A
SECTM1
ASS1
MRPL28
DLL4
IL32
PLAAT2
H2AJ
FUOM
SAMD1
CERS4
LLGL2
SOWAHC
PTGER4
CYB5R1
SIPA1L2
PHLDA1
KRT8
PRSS56
OBSCN
CCN1
CHPF
NFE2L3
C7orf26
PTRHD1
FASN
NEO1
KCNJ18
ERRFI1
ICAM1
AP3B2
COX5B
USH1C
WASL
ZFAND4
S100A2
PPP2CB
SNX18
SCRN2
MICOS13
UFSP1
PAFAH1B3
TFCP2L1
TRIP6
IL1RAP
PGP
DNASE2
H2AW
TGM1
EIF4EBP2
LHFPL6
MEOX1
SLC25A6
COA3
RAB2B
CSRNP1
CUEDC2
BACH2
TLE1
BPGM
SYNC
RBBP4
AQP1
S100A6
MAT1A
CRB2
IL27RA
TBKBP1
SARS2
JOSD1
ACOT1
FZD3
COMTD1
UCP2
ACLY
RIBC2
RASSF2
KDM1A
TMEM251
KIF3B
TAP2
TSHZ2
FAM131C
TSPAN33
TMEM47
GOT1
NT5DC3
MZT2B
FOXO3
B9D1
EVPLL
DAB2
MPG
BSN
SRPRB
PRSS8
DNAJC1
NKX3-1
HCFC1R1
PPP2R5A
DERL1
THEG
TGFB1I1
TMEM268
LOXL1
SCPEP1
TESC
TRIM68
DR1
YPEL1
TMOD1
PEA15
H1-2
FPGS
CBX5
FAM220A
CCN2
EIF5A2
SPRED1
CDK5
TEAD2
FAM167B
MRPS34
NAA38
PRKAB2
MID2
ZBTB12
PHETA2
RUNX1
SOCS1
NBPF1
BID
TPST2
MYL6B
KDM1B
TMEM92
UNC5B
CLDN7
DBN1
PELI1
INKA2
PFKL
CALHM3
PGLS
ZFYVE1
PLLP
TSC22D2
ARHGAP45
SPX
PRKAB1
CREG1
SLC7A1
BAIAP3
ZBTB7B
PSCA
SOX12
ATP6V0A1
RNF165
S100A14
OS9
LRRC75A
ANG
TWF2
SERTAD2
LIPE
TIGD5
C17orf58
CLTCL1
BCL2L15
TMEM41A
CYC1
ATP5F1D
SLC7A11
NCBP2
ZNF619
FGFBP1
SH3PXD2B
SLC41A1
IGFBP3
PRX
SHC2
PRDX2
TBX1
TKT
AKIRIN1
MRPL36
GLP2R
SNX11
PGF
CCDC126
SKI
CSPG4
RIMS4
FSTL3
MAGEF1
RANGRF
TMEM223
LDHD
VIPR2
CBFB
OSGIN1
RTN4RL2
HELZ2
ATG13
UBE2C
NDUFA13
KLHL42
B3GALT6
GJA3
PANK4
ELF3
STC2
KCP
SPINT2
ATXN1L
C12orf49
MUC16
STARD8
MEGF6
HMCN2
PIGH
MARCHF8
PROC
CD9
EAF2
RNF213
PIK3R1
GSTM1
EPHA2
POLR3GL
PANX1
THOC6
CENPX
LENG9
PRKCE
MTMR9
CHKA
RNF182
ENTPD8
PRR15L
ARSD
TRIM47
HIF1AN
BICDL1
MRPL14
NDUFB7
RAB22A
NOTCH1
ACAD9
DNAJC24
EAF1
MAP3K3
TCAIM
CFD
FAM53B
PLAUR
DERL3
MCAT
CALHM2
SBK3
SREBF1
MTF1
CGRRF1
LILRB5
PITHD1
ARC
ERVV-2
CRB3
CCDC102A
RTL8B
ANK2
IFITM1
SEMA4C
RGMB
CENPV
GALK1
NEK7
FP565260.4
TXNL4B
CCDC28A
TRAPPC5
DNPH1
TSPYL2
SNX17
MFHAS1
COMMD4
BBS5
HSPA5
ZER1
POFUT1
CPNE2
NDUFA11
RTCA
G6PD
MYL9
RYBP
OLR1
STK17A
RHEBL1
AC107871.1
CDKN1C
FAM168B
UPP1
DACT3
KPTN
CSNK1A1
FHL3
MMP17
ANTKMT
CREB5
ARHGAP33
UBE2D4
PDLIM2
WDR34
TPM2
L2HGDH
NES
LYRM7
GFOD1
RNF125
APRT
YKT6
SALL4
PLEKHO2
DDX46
BTBD9
CARS1
XRRA1
SLC43A3
IGF2R
IFI44
NME3
CYLD
ALKBH7
FOXN4
OVCA2
PPP1R14D
FBXL8
SLC17A9
TMPPE
UQCR11
PGBD2
MVB12A
MIF
IGSF3
CNNM4
TMEM254
MZT2A
HES2
CCNYL1
SNX30
MEX3B
TRAPPC6B
C11orf95
PPP1R14B
NCBP2AS2
PDRG1
ASPG
PRMT7
PTEN
OBSL1
GIPC3
DOK3
SOCS7
NDUFS8
CLCN4
MTX1
TGOLN2
SRGAP2B
GTF2IRD1
MARCO
STK40
MPC1
OSBPL6
HSPA2
PITX3
TCOF1
HSD17B7
GNA12
GDA
SLCO2B1
SLC23A2
WDR4
SYP
DENND2C
OGFRL1
PIP4K2A
ULBP2
LIMD1
RAB21
HSD3B7
LZTS3
TMEM160
STK10
SIVA1
ZMYND15
ISCA1
TCEA2
MAPK12
CHMP4C
VLDLR
TMEM141
WT1
TRIM21
GDF11
CAPN1
ABI1
TIPRL
AKR1C3
VAMP4
GXYLT1
ALPI
HOXB6
LAMA1
SLC35E3
PITPNC1
HSPB8
HTR1D
KLHL12
KCNK15
TRIM62
CTXN1
ALAD
CHCHD10
AMDHD2
CERS6
ZNFX1
GSTP1
MCM5
ABCA1
MED8
MARCKSL1
CA11
PHF23
PTGES2
TCTN3
GPR107
PACSIN3
GLRX2
GALT
MAPK3
ARRDC4
SOX9
GPRIN1
LRRC57
DHRS7
NRARP
ISG15
LANCL2
OXLD1
DHRSX
PRR15
FLYWCH2
HES5
OTUD7B
FIS1
ARHGEF11
MRPL34
RMND5A
POLD1
FZD5
C20orf204
THBS1
KIF3A
COL9A3
MAPKBP1
UGCG
TMEM54
BAD
SLC7A7
MFSD3
TM2D2
ACSF2
IFIH1
UNC93B1
SERINC3
LZTS2
ARHGEF16
MACROD1
GALE
FOXF2
JOSD2
LZTS1
SP4
FICD
STXBP2
CDH15
CHML
HPCAL4
TRIP10
XBP1
MAPK8
APMAP
EXD3
RABGGTB
C9orf72
SAR1B
CRKL
SASH1
FBXL17
NAA30
SLCO3A1
PSAT1
CITED4
LYPD3
CCDC9B
AXL
NAPRT
PARVB
GRAMD1A
NAXE
DBNDD1
TMTC2
SDE2
NUDT8
TMUB1
RABAC1
C1orf167
ZFAND5
LMO7
RBM3
MTMR14
GCLC
CDV3
PCBP1
ZFP69B
AC024592.3
GSTT2B
PNPLA3
RGS19
CLPP
MRPL54
SARS1
HSPA13
PGBD5
IL6R
REEP3
GRB7
FOXJ2
RAD1
CARD10
HABP4
TBCCD1
TAF3
PALM
SDHAF1
DGKQ
NRBP1
MPPE1
SARAF
TBPL1
CEBPG
MCL1
MTA1
EMC3
TMEM184C
SORT1
IGFBP1
WSB1
KCNN4
DET1
TRIM31
NDUFB1
UCKL1
TRABD
BTBD10
EXOSC4
EDC3
GTF2H2
SNX24
CDC14A
GRAMD1B
FAM210B
TOM1L2
TUBE1
STIMATE
TNNC1
FOXL1
SLC25A38
VGLL4
ZNRF2
OSER1
FBXO45
FXYD3
C1orf52
RHBDL1
VGF
TMEM238
SPSB2
RAB11FIP1
NINJ2
CHCHD7
UNC119B
EXTL3
DUSP4
NTSR2
PRDX5
FAM174C
MVB12B
MARCHF9
TUFT1
VPS51
SMAP2
MRPL57
SAP30L
MAP3K14
CYBA
CYRIA
STIM2
TERT
ABI3
TMEM127
NDUFS7
PMF1
NCOA1
ETV3
PPM1B
NUDT14
MGST3
TMEM167B
PDF
TMEM38B
CMTR2
TNNT1
MOSPD1
SQOR
LRRC8A
LRP11
TUBGCP3
NDEL1
DKK1
TEX30
MLF1
KLHL18
HTRA2
TSTA3
PHPT1
GRB10
RAB34
MGAT5
TPPP
DIPK2A
TGFBR3L
ETHE1
TENT5C
FMNL3
CEP164
TFR2
ITPR1
FAM161B
GDE1
ROMO1
FBXO22
TPRG1L
ZNF143
TNFRSF11A
CHKB
OSTM1
MCTP1
NIPSNAP1
FBL
EXOSC5
F2R
BBS7
SMPD2
IL17RD
KLF17
LRRC45
C8orf37
KCTD11
KCNS3
HACD1
KIF1B
ACADS
NAPG
PDE12
ATF7
GATAD1
APLP2
CYTH3
GOLM1
FOXD1
ARHGAP31
LATS2
UHRF1
EIF5
TMCO6
RFX8
NOMO2
SMIM10
FAM118B
IFRD2
SEC11C
NMRAL1
UBN1
ENTPD2
NOCT
TAF9
RAB3IP
SLC30A7
HEY2
NUDT22
ZSWIM5
PTPN1
MRPS12
MRPL43
SPINK13
TSPYL4
SEL1L
SLC31A1
RETREG3
RMDN3
PRC1
STX12
TMCO1
ESRP2
PGGHG
SLC35D1
TMEM267
POGLUT2
GBX2
ISOC2
AP1AR
F12
INPP4A
PKN3
RNF41
VDR
ASB7
IL15
PPARD
FZD2
ENKD1
ENC1
APBB2
ERLIN2
LMO4
PFN1
AGTRAP
FBXL6
SLC35B2
TNFRSF10A
PPP1R13L
LRRC61
TRIM25
SKA1
NREP
FZR1
PLCH2
SLC25A51
MAP2K3
GATD1
FZD9
MINPP1
TBC1D12
ARL4C
SGMS1
HOXC11
PARVA
CLCN5
CEACAM7
CLCNKB
ZNF330
ZSWIM4
PSMG3
ZDHHC8
ETS1
TLL1
EML2
DBNL
MICA
MTOR
CCDC187
NDUFAF3
TBC1D31
GADD45GIP1
STAT2
APOL6
SYNPO
UNC13B
AOPEP
PAIP2B
LRCH4
AATK
PLCE1
GJB5
TIMM23B
CCNY
LANCL3
HSF4
WBP1L
TMSB15A
TARS3
MGST1
H2AC19
SPRED2
KDM2A
SEC22C
DIRAS1
NOTCH2
TLCD1
FARP2
KCMF1
MOCOS
RRAS
CTDSP2
USP20
RASSF9
AVPI1
APOBEC3C
EFCAB12
DCTPP1
TTPA
SMIM15
SUGT1
FITM2
AKAP12
KHNYN
TMEM185A
ZNF444
ZBTB34
UBN2
CACUL1
HYI
TMED8
POLR3D
CCDC51
DEPP1
BCKDK
SPTBN2
HECA
ZNF860
TSPAN13
ZNF771
NKX3-2
PRSS16
AK1
TOX3
S100A13
LYPD1
HMGA1
ENY2
GBF1
ZBED6CL
USE1
FNDC10
IL11
IFI27L2
JPH2
OTULIN
RNF103
MXD3
SLC33A1
AMMECR1L
INPP5J
ENTPD7
TMEM184A
ODF2
TNFSF9
IRF2BPL
POLRMT
SLC25A30
EOLA2
MAFB
IFT46
TMEM52B
GAN
CA9
BPNT2
LAMP2
TEF
GCA
ALS2CL
AC090527.3
NECAP1
IRS2
ALKBH5
MRPS24
POLR3A
PHF8
SPATA5L1
SPATC1L
KAZN
PXK
DDR1
ULBP1
INPP5F
PTPRN2
PDK3
HSPB7
NKD1
PTMS
IL2RB
CCDC88B
ALG5
KIAA2013
SAMHD1
MARCOL
GAL
SGPL1
MMACHC
ACTR6
TMEM170A
PDE6D
MAPK8IP2
LHX3
ARAP3
SLC9A3
P2RX1
OPLAH
PLPP3
FAM72D
PDP1
SERP1
ISYNA1
KDM4A
MRPL23
SLC25A16
PAQR5
TRIM54
FBXL14
AAMDC
ANO7
SFRP5
SLC35F5
MT2A
VTI1B
HEXIM2
ANKRA2
MTMR3
GTF2E2
CDC42BPG
BTD
SLF1
CAMK2N2
EHF
STAMBPL1
ZNF862
CEP85
SCARB2
FZD8
CCM2
SLC35G1
TM7SF3
JMY
RCN2
FUCA1
ABO
NDUFAF1
FBXW2
LARGE1
SCOC
TXNDC12
OAF
QTRT1
CDK7
MGMT
LPCAT2
EXOC8
CD163L1
ORAI2
MAP1LC3B
TRAM2
SMIM19
YIPF1
GGH
DNAAF1
ST6GALNAC6
AZIN1
CDR2
ATP6V0A2
QPRT
ODC1
ZBTB39
ADAT3
B3GNT2
C1orf159
ODF3B
EPB41L1
FAM214A
SLC16A6
CCDC177
PPP1R13B
PTK6
LRFN4
LY6D
CYP1B1
ANXA9
ARHGAP26
NPTXR
MPND
ZC3H12D
C4orf48
RNF126
MEX3A
CDK10
TRIM65
STXBP3
EDN1
SENP2
STARD7
PI4KB
SYNM
PTPN21
NOD1
CEACAM1
MYH9
RADX
SLC29A3
GLTP
COL20A1
PSMB10
SPTY2D1
MED10
FAM126A
BEND6
POLE3
ROR1
ROR2
GPN3
CYSRT1
PHYHIP
CFAP410
SYVN1
COL5A3
PDCD11
YAP1
LGSN
DNAJC9
FAM98C
KCTD21
WRN
PRSS21
NFKB2
WDR47
PLCG2
USP31
CMTM6
SEMA4F
RRM2B
CYP20A1
VPS37A
SRSF8
NALCN
AKTIP
HPSE
PCYOX1L
ADAMTSL4
DNAJA4
GTF2H2C
KRT86
VARS1
LNPEP
NEURL2
MT1E
IFIT2
ALG6
TSPAN9
TFAP4
SVIP
FAM3C
IMPA1
TSEN15
COL13A1
THRA
TBRG1
PMAIP1
ZNF622
VPS4A
WDR13
KCNC3
FUT4
TRIM69
NICN1
FEM1B
ALKBH3
TBC1D13
AFF4
TNFRSF14
GCLM
TATDN3
KCNIP3
KREMEN2
KLHL22
MED11
EIF1
PTP4A2
POLB
ZSCAN9
AXIN2
TSC1
ZDHHC7
EFNA3
CPT1C
BMP6
ZNF692
RBPMS2
SMG5
ALG10
MTFP1
CROT
TMEM167A
SH3KBP1
SLC41A2
TFEB
NUDT9
ITPRIP
GRIP2
VRK3
AFDN
JAG1
FBXL3
CHST7
GPAM
SLC31A2
MPI
LSM11
ABHD2
SIAH2
FBXW9
AMOTL2
TGFBR2
USP46
MAP2K5
SH3BP5
LIPH
EXT2
SPPL2A
KIAA0825
TMEM86A
ANKRD40
ART1
KRT17
RAB10
TBC1D2B
PRDM4
GPR160
RELL1
ORMDL3
TMEM87A
IFRD1
SESN3
MZT1
GNPDA2
NEIL1
CYP27C1
RBM48
ABHD16A
MFSD14B
AKR1C4
MIS18A
ABCC2
TMED7
CASZ1
ZNF263
PLEKHA8
IRAK2
MYT1L
HK2
PRRG4
E2F8
SERPINB8
RMC1
MMD
ANKRD42
UBE2D1
DNAAF5
DNMT3L
CDK8
CDC42EP3
GLE1
BTG1
LMO2
JMJD4
LIPT2
SLC39A14
PSPH
LMX1B
MARCHF6
KPNA4
CAMKK2
VWA7
RSL24D1
ZDHHC5
CLN8
ADAM17
TGM2
PTPDC1
ABITRAM
HPGD
RORC
SLC35A1
TLE2
MAPKAPK2
FBXO48
PTGES3L
NDFIP1
RGS11
COMMD10
PTPRJ
SRF
NCSTN
SEMA7A
MYO7B
TMEM182
SMPD3
GPATCH11
TLNRD1
ADAM8
PLEKHA3
MUC12
GOLPH3
AMN
SYCE2
C16orf70
MEGF9
LONRF1
C9orf78
CD47
TRANK1
ZNF761
KIAA1217
PARD6G
DES
LPIN2
BUD31
GMCL1
SSH3
ARL5B
DSTYK
TRABD2A
NT5C2
LRRC24
SGMS2
RASSF7
AC106782.1
ABHD10
DRGX
ATP6AP2
AP002990.1
RUBCN
TK2
AEN
MMP15
CENPL
MARVELD2
HHAT
NCEH1
ATXN1
TMEM192
GRHL1
MACIR
NTN1
RNASE4
INIP
TNRC6C
HUS1
RBM18
CD274
CRAMP1
PLAT
SERPINF2
CCSAP
SLC25A33
RANBP10
CCDC113
TMEM209
MAML1
HIVEP2
BCL3
SLC25A25
TOR1A
SPATA24
MAMDC4
CD99L2
RNF39
CSNK2A2
TMEM132B
SNAP47
TSPAN12
EDEM2
C12orf29
MTHFD2
YIPF5
RHPN1
SLC22A23
TCIM
PRCP
CNST
ATP6V1B2
EIF1B
CALM1
CTC1
PSAP
PEX11A
ANKRD2
CEP104
BCL7A
GNG4
H2AC8
FLRT1
TACC2
TGFA
C15orf41
MFSD2A
ABTB2
ADGRG2
SPNS2
CHIC2
GCGR
RUNDC3A
GPR3
SELENOP
SUCO
AOC2
AOC3
DNAJC25
ATG3
PHF20L1
AC005041.1
TIMM13
PDZK1IP1
LMNTD2
ZNF142
ARF4
ECE1
PLEKHG2
JCAD
TMEM64
CDC37L1
TSR2
BSDC1
TSPAN18
NFKBID
PRR19
CDAN1
KPNA2
MAN2B2
DHDDS
SOGA1
HGD
YIPF4
ASTN2
CRIP1
GDAP2
C18orf21
BTN2A1
MBP
CREM
APBB3
EDEM3
DYNC1LI1
TXLNA
RASEF
NUDT18
DCUN1D3
ODF3L1
CEP19
ATG12
ZNF18
EOLA1
CNTRL
RNF115
ZNF777
SAMD8
TPBG
KLHL15
SLC51B
ZMAT3
PER2
HOXA5
CSGALNACT2
SLC1A4
HS2ST1
TBC1D14
IGF2BP2
SLC17A7
DESI2
RNF11
LCP1
POLR2A
TVP23C
SSTR1
ADIPOR2
PLB1
TMEM159
ADCK2
RBM10
PCGF5
FOXP4
EHD4
GCAT
ORMDL1
CLMP
DNAJB4
DNAJC3
TRIM38
FNDC11
ARHGEF7
H3-3B
MAPK11
RND1
STOM
CA13
ACBD4
FBXO42
C18orf25
ATP1A3
PDPR
TTC39B
CHST3
PDSS2
DNAJB1
TEP1
MOSPD3
GFPT2
RAP2B
PHF7
TP53I11
PPM1K
CYP2U1
USP38
AL662899.2
RO60
TET2
RRBP1
RNASEL
ALDH9A1
SLCO5A1
MTG2
PSEN1
SDC2
RBSN
SMURF1
MDGA1
FNTB
FNDC3B
DUSP18
RP9
TSPYL1
TTC5
AMBRA1
PPEF1
OLFM2
ACY1
WDR26
EMP1
FLT3LG
GTDC1
RNF139
IL17REL
CDKN2A
RSAD1
TAF5L
KIAA1958
MBLAC2
INPP5A
MCFD2
ARHGEF39
PDGFB
ARHGAP20
WIPF3
ZCCHC17
AAK1
CHSY1
TFRC
SAYSD1
PIK3R3
H2AC18
GATD3B
DGAT2
CDK5R2
MGAT1
RSPH3
SP140L
POM121C
EFNA5
MXD1
SLC35D2
ZBTB18
FOXA1
EHD2
TNFSF4
ANGEL1
SORBS2
FLCN
IGSF1
IP6K1
LAMP1
PIK3CD
HMGXB3
CNTNAP3
KATNBL1
FAM189A2
HNRNPH3
HORMAD1
PPP1CC
TRIM2
ZNF496
PDCD7
TBC1D8
TRIM26
MAP3K4
RAB33B
DNAJB6
CBLB
ALS2
ARL6
FRRS1
PODNL1
ADAMTS5
ZNF134
ZFAND2A
RTP3
FAM171A2
VPS37C
PASD1
PCDH1
TMEM255B
ETV1
LIMS2
ZCCHC14
MTMR11
SYS1
CHST10
ATP6V1E1
AGK
XK
LOXL3
PER3
PLPP2
TNKS
LARP1B
LSM14B
SEZ6L2
RNF216
NOMO1
CREBBP
TWSG1
HPF1
UXS1
TTC17
LHX6
HSD17B8
SUPT5H
CASP3
SENP8
LINS1
PTP4A3
TMEM231
POGK
ERMP1
GALNTL6
OLFML2B
OSTF1
TMPRSS9
SERINC1
PPM1H
RAB23
MAPK8IP1
WDPCP
TMEM39A
ISG20L2
SPACA6
MIDN
FCHO1
SPDEF
ZNF222
ALDH1L2
FRMD6
TNRC18
PROM2
BCL10
KCNH2
DENND6A
IFNGR1
CLEC16A
TBC1D16
LACC1
CRYZL1
ZNF500
SLC48A1
SLC9A5
SLC37A3
MAN2A1
ASRGL1
SHFL
SLC12A1
TMEM81
STARD3NL
PELO
CLDND1
NIPA2
PKD1
TMEM242
GLCE
ATF5
CACNA1H
CTSV
POLG
RPN2
MMGT1
MBOAT1
ENTPD5
QSOX2
IER3IP1
EP300
RETSAT
ZNF720
TMBIM1
DNAJC6
FBXO3
MYORG
CARD6
TXNDC15
NPHP3
TM4SF4
UQCC2
NETO2
HES6
CBWD2
GDPD5
FBXO36
KLHL17
PRKCG
M6PR
SMAD1
PPIP5K1
HPS4
RSKR
BAK1
VASN
RBM6
GEMIN2
TRAK1
FAM8A1
SAMD4A
RCOR1
PLA2G12A
GPT2
CPD
NAGK
PIEZO2
RNF14
SMIM20
SLIT2
SCARA5
FNTA
TSHZ1
S1PR4
CD19
WDR53
FYN
BTN3A3
HIPK1
LMBRD1
MAST1
CDADC1
UBL3
ZSWIM6
ACVR1
ABHD13
TESMIN
BLOC1S2
ZXDC
ZPR1
HAS2
DTD1
SCIN
RAMAC
ADAMTS7
MAGIX
SLC2A9
OR51E2
RAD54L2
EPHA10
FIBCD1
FRMD3
RRP12
TESK2
NUS1
GCH1
GPT
CLDN23
TMED5
NECAP2
GTF2H3
ADAMTS15
MED13L
BTBD19
OSGIN2
ANAPC10
ETNK1
UBE2J1
PAIP1
TMEM50B
CREBRF
DIO3
TUBA4A
SEC22A
CBARP
TMED9
SPRY2
HAUS3
ZNF746
RCBTB2
TCAF1
ERLEC1
SLC45A3
MKRN1
TBC1D22B
ZNF674
DTWD2
ELMO2
EMC1
ANO2
MTCP1
NMNAT1
WWC3
RAP1A
UCHL3
MAP6D1
SCNN1A
FGF12
HOXB5
SLC49A4
MGAT2
ANKRD13B
FAM160A2
NFE2
TTLL7
CCDC153
TM9SF3
TCAP
TAP1
CPQ
CMTR1
LIF
AMN1
DSCC1
MFAP2
PRRG1
GATA5
[truncated: 2,390 more rows]

## Sheet: TCGA
gene name	baseMean	log2FoldChange	lfcSE	stat	pvalue	padj
GABRD	165.554	4.5297	0.194412	23.2995	4.49e-120	8.03e-116
PLVAP	4410.84	2.91831	0.13808	21.1349	3.8e-99	3.4e-95
CDKN3	368.002	3.90989	0.189295	20.655	8.8e-95	5.25e-91
CDC25C	195.727	4.35966	0.21313	20.4554	5.37e-93	2.4e-89
UBE2T	369.21	3.20066	0.157385	20.3365	6.11e-92	2.19e-88
CENPF	984.307	3.88566	0.192248	20.2118	7.72e-91	1.97e-87
NUF2	269.84	4.19556	0.207536	20.2161	7.07e-91	1.97e-87
SKA1	220.173	4.47262	0.22152	20.1906	1.18e-90	2.65e-87
TROAP	384.362	4.22691	0.210488	20.0814	1.07e-89	2.13e-86
ZIC2	235.624	6.66897	0.332907	20.0325	2.87e-89	5.13e-86
KIFC1	632.969	3.75973	0.190437	19.7426	9.28e-87	1.51e-83
THBS4	722.712	5.51135	0.280645	19.6381	7.3e-86	1.09e-82
KIF4A	460.788	3.90938	0.199169	19.6285	8.84e-86	1.22e-82
BIRC5	1027.65	4.09755	0.209159	19.5906	1.86e-85	2.38e-82
HJURP	333.741	3.89349	0.198971	19.5681	2.89e-85	3.45e-82
NEK2	334.515	3.93744	0.201843	19.5074	9.49e-85	1.06e-81
CDCA5	527.086	3.44007	0.176985	19.4371	3.75e-84	3.94e-81
GPC3	29345.1	5.95527	0.306537	19.4276	4.51e-84	4.48e-81
COL15A1	1023.59	3.7997	0.195898	19.3963	8.29e-84	7.8e-81
ADAMTS13	508.562	-2.80037	0.144448	-19.3868	9.98e-84	8.93e-81
MELK	286.422	3.78177	0.195716	19.3227	3.46e-83	2.94e-80
CCNB2	421.091	3.7194	0.192876	19.2838	7.34e-83	5.97e-80
CDC20	796.919	4.28112	0.222222	19.2651	1.06e-82	8.2e-80
ASPM	815.382	3.71466	0.193774	19.1701	6.58e-82	4.82e-79
ARHGEF39	216.988	2.93588	0.153159	19.1688	6.74e-82	4.82e-79
NCAPG	402.294	3.78927	0.197951	19.1424	1.12e-81	7.7e-79
KIF2C	417.722	3.93323	0.205545	19.1356	1.28e-81	8.45e-79
SPC24	488.834	3.4849	0.182736	19.0707	4.42e-81	2.83e-78
TOP2A	1781.49	3.88814	0.20421	19.0399	7.97e-81	4.92e-78
SLC26A6	1015.47	2.65356	0.139475	19.0253	1.05e-80	6.27e-78
PRC1	758.425	3.20665	0.168725	19.0052	1.54e-80	8.91e-78
KIF18B	259.935	4.02525	0.213735	18.8329	4.06e-79	2.27e-76
EBF2	48.331	5.19844	0.27635	18.811	6.13e-79	3.32e-76
UBE2C	648.309	4.11852	0.218982	18.8076	6.55e-79	3.44e-76
MXD3	433.874	2.67852	0.14252	18.794	8.46e-79	4.32e-76
CCNB1	908.996	3.27713	0.17499	18.7275	2.96e-78	1.47e-75
PTTG1	725.123	3.73987	0.200212	18.6795	7.26e-78	3.51e-75
KIF20A	425.336	3.70401	0.198736	18.6379	1.58e-77	7.46e-75
EXO1	196.725	3.60065	0.193491	18.6089	2.72e-77	1.25e-74
NDC80	325.946	3.30935	0.178049	18.5867	4.12e-77	1.84e-74
MYBL2	955.224	4.56335	0.245858	18.5609	6.66e-77	2.91e-74
CDK1	621.371	3.47596	0.1873	18.5583	6.99e-77	2.98e-74
CENPA	132.564	4.11666	0.222104	18.5349	1.08e-76	4.49e-74
BUB1	330.07	3.49152	0.188536	18.5191	1.45e-76	5.89e-74
DLGAP5	248.936	3.6961	0.199942	18.4858	2.69e-76	1.07e-73
CXORF36	426.53	2.21161	0.120485	18.356	2.96e-75	1.15e-72
FOXM1	702.377	3.59704	0.197248	18.2362	2.67e-74	1.01e-71
FBXO43	58.4903	4.04973	0.223064	18.155	1.17e-73	4.37e-71
HOXA13	273.023	6.9847	0.387343	18.0323	1.09e-72	3.96e-70
E2F1	884.701	3.67862	0.205222	17.925	7.52e-72	2.69e-69
SKA3	178.534	3.54401	0.197746	17.922	7.94e-72	2.78e-69
ESM1	454.239	4.16675	0.232547	17.9179	8.55e-72	2.94e-69
CDKN2A	692.455	4.06705	0.227191	17.9014	1.15e-71	3.88e-69
CDCA3	319.542	3.29672	0.184272	17.8905	1.4e-71	4.63e-69
PLK1	476.526	3.53563	0.198063	17.8511	2.84e-71	9.22e-69
OIT3	1058.23	-3.25906	0.183266	-17.7832	9.53e-71	3.04e-68
TTK	216.201	3.77777	0.21245	17.7819	9.76e-71	3.06e-68
CDCA8	351.627	3.15578	0.177784	17.7507	1.7e-70	5.25e-68
ANLN	485.877	3.61618	0.204183	17.7105	3.48e-70	1.06e-67
HMMR	365.642	3.22622	0.182459	17.6819	5.78e-70	1.72e-67
APLN	355.794	3.88746	0.219995	17.6706	7.06e-70	2.07e-67
TERT	228.388	8.61336	0.488708	17.6248	1.59e-69	4.59e-67
HIGD1B	48.4672	3.14017	0.17855	17.587	3.1e-69	8.79e-67
PKMYT1	257.944	3.16643	0.1807	17.5231	9.55e-69	2.67e-66
IQGAP3	729.594	3.42036	0.197628	17.3071	4.16e-67	1.15e-64
AURKB	359.191	3.57879	0.206861	17.3005	4.67e-67	1.26e-64
DTL	464.132	3.26282	0.188942	17.2689	8.07e-67	2.15e-64
CDT1	540.698	3.43342	0.199029	17.2509	1.1e-66	2.9e-64
MKI67	1306.29	3.35135	0.194475	17.2328	1.51e-66	3.91e-64
RACGAP1	624.811	2.41191	0.140045	17.2225	1.8e-66	4.6e-64
TRIP13	231.766	3.42368	0.198866	17.216	2.01e-66	5.07e-64
GTSE1	216.556	3.53377	0.205314	17.2115	2.18e-66	5.41e-64
BUB1B	256.904	3.50372	0.203702	17.2002	2.64e-66	6.48e-64
RRM2	1188.88	3.06494	0.1783	17.1898	3.16e-66	7.65e-64
IGF2BP1	638.848	7.02476	0.408896	17.1798	3.76e-66	8.97e-64
EZH2	511.053	2.4085	0.140287	17.1684	4.58e-66	1.08e-63
SPC25	133.788	3.13773	0.183487	17.1006	1.47e-65	3.41e-63
EME1	99.7337	3.24735	0.190115	17.0809	2.06e-65	4.72e-63
DEPDC1	212.182	3.75753	0.220685	17.0267	5.21e-65	1.18e-62
CDC6	551.38	3.20022	0.188144	17.0094	7e-65	1.56e-62
CD34	1860.31	2.09282	0.123264	16.9783	1.19e-64	2.63e-62
TICRR	108.546	3.6657	0.216064	16.9659	1.47e-64	3.21e-62
TOMM40L	1473.97	1.73145	0.102104	16.9576	1.69e-64	3.64e-62
MAP2K1	1985.93	-1.27506	0.075203	-16.9549	1.77e-64	3.77e-62
CENPM	294.947	3.54468	0.209219	16.9424	2.19e-64	4.61e-62
AURKA	796.539	2.68903	0.158775	16.9361	2.44e-64	5.07e-62
CPLX2	2430.64	9.08092	0.536209	16.9354	2.47e-64	5.07e-62
CELSR3	288.579	3.46491	0.20506	16.897	4.73e-64	9.62e-62
CENPE	217.83	3.12794	0.185257	16.8843	5.87e-64	1.18e-61
FAM189B	1285.59	1.67926	0.0995604	16.8668	7.9e-64	1.57e-61
CDH13	395.049	2.32324	0.137902	16.8471	1.1e-63	2.17e-61
CENPL	184.747	2.36494	0.140444	16.8391	1.26e-63	2.45e-61
TRAIP	162.553	2.82812	0.16841	16.7931	2.74e-63	5.27e-61
NEIL3	78.9589	4.16331	0.249246	16.7036	1.23e-62	2.35e-60
TGM3	874.999	5.3687	0.322485	16.6479	3.13e-62	5.9e-60
CCL23	24.1354	-2.97094	0.179072	-16.5907	8.14e-62	1.52e-59
STAB2	247.636	-4.83376	0.291648	-16.574	1.07e-61	1.98e-59
PBK	247.178	3.39228	0.205307	16.523	2.51e-61	4.58e-59
KIF23	267.978	3.2856	0.199824	16.4425	9.5e-61	1.72e-58
OLFML2B	379.514	2.98205	0.181573	16.4235	1.3e-60	2.32e-58
CDC45	254.124	3.07405	0.188174	16.3362	5.46e-60	9.66e-58
CKAP2L	200.108	3.18906	0.19527	16.3315	5.89e-60	1.03e-57
NCAPH	240.908	2.96325	0.181479	16.3283	6.2e-60	1.08e-57
CCNA2	552.049	3.4923	0.214383	16.29	1.16e-59	2e-57
CSRNP1	1959.61	-2.24631	0.138113	-16.2643	1.77e-59	3.01e-57
FLVCR1	639.215	2.20759	0.135751	16.2621	1.83e-59	3.09e-57
E2F8	138.654	3.64207	0.224104	16.2517	2.17e-59	3.63e-57
KIF14	188.897	3.08772	0.190017	16.2497	2.24e-59	3.72e-57
MND1	110.199	2.94544	0.18158	16.2212	3.57e-59	5.87e-57
VPS45	1257.7	1.13124	0.0697838	16.2107	4.24e-59	6.89e-57
NXPH4	241.74	5.58793	0.344777	16.2074	4.47e-59	7.21e-57
MDK	7239.71	3.83354	0.23661	16.2019	4.89e-59	7.8e-57
TRIM71	353.805	8.64202	0.533459	16.2	5.05e-59	7.99e-57
MSTO1	568.694	1.71277	0.10587	16.1781	7.2e-59	1.13e-56
TCF19	759.531	2.77762	0.172613	16.0916	2.92e-58	4.55e-56
CENPI	87.9662	3.09835	0.192844	16.0666	4.37e-58	6.74e-56
KIF18A	109.951	3.3396	0.208249	16.0366	7.1e-58	1.08e-55
C5ORF34	67.5003	2.41148	0.151101	15.9594	2.45e-57	3.72e-55
ECM1	710.1	-3.05247	0.191764	-15.9178	4.77e-57	7.16e-55
SGO1	124.833	3.04788	0.191541	15.9124	5.2e-57	7.75e-55
PARPBP	139.277	2.68922	0.169284	15.8858	7.95e-57	1.17e-54
ASF1B	393.273	2.98017	0.187687	15.8784	8.94e-57	1.31e-54
KIF15	152.179	3.34958	0.212109	15.7918	3.54e-56	5.15e-54
ANGPTL6	273.332	-2.96751	0.187971	-15.7871	3.82e-56	5.51e-54
THY1	2163.78	2.55609	0.162163	15.7624	5.64e-56	8.07e-54
SHCBP1	163.876	3.30266	0.209598	15.7571	6.14e-56	8.71e-54
CFP	416.877	-3.37356	0.214579	-15.7217	1.07e-55	1.51e-53
MAGEA1	364.81	9.24131	0.58798	15.7171	1.16e-55	1.61e-53
SPATS2	717.536	1.57388	0.100157	15.7141	1.21e-55	1.68e-53
DUSP9	1158.18	5.04304	0.321539	15.6841	1.94e-55	2.67e-53
ERCC6L	64.1895	3.20172	0.204294	15.6721	2.35e-55	3.2e-53
CEP131	625.068	1.8027	0.11511	15.6607	2.81e-55	3.8e-53
DIAPH3	146.679	3.38296	0.216994	15.5901	8.5e-55	1.14e-52
NOX4	59.7124	2.83914	0.183083	15.5074	3.09e-54	4.13e-52
ORC1	164.886	2.91784	0.189213	15.4209	1.18e-53	1.57e-51
MMP11	775.005	3.80148	0.247145	15.3815	2.18e-53	2.86e-51
PGC	1266.1	9.25702	0.602917	15.3537	3.34e-53	4.37e-51
SPDL1	281.402	1.80608	0.118019	15.3033	7.27e-53	9.42e-51
TARBP1	1323.52	1.7978	0.117626	15.2839	9.79e-53	1.26e-50
C20ORF204	266.945	5.12302	0.33608	15.2434	1.82e-52	2.33e-50
PLXDC1	299.326	2.82342	0.185384	15.2301	2.23e-52	2.83e-50
EPS8L3	761.94	4.92613	0.323823	15.2124	2.93e-52	3.69e-50
RCAN1	3371.2	-2.38865	0.15704	-15.2104	3.02e-52	3.77e-50
XRCC2	102.365	2.89988	0.190743	15.2031	3.38e-52	4.19e-50
GMNN	1689.72	2.20777	0.14528	15.1966	3.72e-52	4.56e-50
C16ORF59	210.153	2.78822	0.183473	15.1969	3.71e-52	4.56e-50
ARHGAP11A	341.737	2.53675	0.16704	15.1865	4.34e-52	5.28e-50
TMEM120B	428.55	1.26034	0.0830605	15.1738	5.27e-52	6.37e-50
RND3	2346.04	-2.48832	0.164297	-15.1452	8.15e-52	9.78e-50
B4GALNT1	333.336	4.22201	0.278927	15.1366	9.29e-52	1.11e-49
UHRF1	255.964	3.22273	0.213095	15.1235	1.13e-51	1.34e-49
BCAN	142.01	4.63452	0.307093	15.0916	1.84e-51	2.15e-49
RECQL4	932.932	2.71397	0.17983	15.0919	1.83e-51	2.15e-49
MTFR2	66.8033	3.02584	0.200591	15.0846	2.04e-51	2.37e-49
ZWINT	714.351	2.46037	0.163237	15.0723	2.46e-51	2.84e-49
E2F2	114.828	2.99847	0.199375	15.0394	4.05e-51	4.65e-49
GINS1	369.555	2.7381	0.182619	14.9935	8.1e-51	9.22e-49
RAD54L	102.494	3.36123	0.224208	14.9916	8.34e-51	9.44e-49
DSCC1	166.722	2.07842	0.138725	14.9823	9.59e-51	1.08e-48
POLQ	118.776	2.99436	0.200224	14.9551	1.44e-50	1.61e-48
FANCI	531.918	2.26047	0.151163	14.9538	1.47e-50	1.62e-48
LRRC14	1240.36	1.51821	0.101525	14.954	1.47e-50	1.62e-48
TBC1D16	1947.08	1.70871	0.114517	14.9211	2.4e-50	2.63e-48
CENPW	262.176	2.59632	0.174006	14.9208	2.41e-50	2.63e-48
ORC6	136.035	2.84708	0.191052	14.9021	3.19e-50	3.46e-48
BMPER	97.3952	-4.48649	0.301181	-14.8963	3.48e-50	3.75e-48
OTX1	55.2212	4.43083	0.297714	14.8829	4.26e-50	4.56e-48
ISX	313.275	7.17799	0.482581	14.8742	4.85e-50	5.16e-48
STIL	187.098	2.36377	0.159023	14.8643	5.62e-50	5.91e-48
JRK	379.286	1.77079	0.119128	14.8646	5.59e-50	5.91e-48
CCNF	360.67	2.17844	0.14662	14.8577	6.2e-50	6.49e-48
ZIC5	87.6733	6.6903	0.450622	14.8468	7.29e-50	7.58e-48
CDCA2	100.985	3.18084	0.214561	14.8249	1.01e-49	1.05e-47
RASD2	61.9532	2.638	0.178614	14.7693	2.31e-49	2.38e-47
TTC13	675.076	1.41428	0.0957623	14.7687	2.33e-49	2.38e-47
WDR62	294.624	2.56627	0.173805	14.7652	2.46e-49	2.5e-47
GNAZ	508.752	3.6345	0.24644	14.748	3.17e-49	3.2e-47
E2F7	80.1399	3.47476	0.23644	14.6962	6.82e-49	6.85e-47
C21ORF58	168.513	2.2743	0.154778	14.6939	7.05e-49	7.05e-47
SGO2	181.43	2.37479	0.162098	14.6503	1.34e-48	1.33e-46
TONSL	686.582	1.94876	0.133235	14.6265	1.9e-48	1.88e-46
CEP55	168.571	3.0578	0.209442	14.5997	2.82e-48	2.77e-46
ZFP41	453.972	1.94322	0.133103	14.5994	2.83e-48	2.77e-46
REG3A	6619.97	10.1546	0.698606	14.5356	7.21e-48	7.01e-46
PYGO2	2302.13	1.22829	0.0845397	14.5292	7.92e-48	7.65e-46
UCK2	1364.31	1.65284	0.113774	14.5275	8.11e-48	7.8e-46
FAM83D	515.679	2.39942	0.165189	14.5253	8.38e-48	8.01e-46
OLFML2A	454.97	2.4039	0.165616	14.5149	9.75e-48	9.27e-46
MYO18B	155.77	7.23753	0.49911	14.5009	1.2e-47	1.13e-45
MCM10	159.403	3.03424	0.209942	14.4527	2.41e-47	2.27e-45
ZNF692	916.951	1.7062	0.118116	14.4451	2.69e-47	2.52e-45
STMN1	3292.98	2.11879	0.147004	14.4131	4.28e-47	3.99e-45
MESP2	56.8763	3.40864	0.236528	14.4111	4.4e-47	4.08e-45
NDUFA4L2	1141.5	2.80466	0.194628	14.4104	4.45e-47	4.11e-45
HOXD9	85.2361	4.64809	0.32263	14.4069	4.68e-47	4.3e-45
SIX1	49.6685	4.9303	0.342473	14.3962	5.47e-47	4.99e-45
ZFP36	7533.01	-2.15448	0.150045	-14.3589	9.36e-47	8.5e-45
TNFRSF4	157.574	2.33533	0.162715	14.3523	1.03e-46	9.31e-45
COX4I2	94.2262	2.87042	0.200328	14.3286	1.45e-46	1.3e-44
NUSAP1	943.703	2.25976	0.157731	14.3267	1.49e-46	1.33e-44
ANKRD52	1359.45	1.425	0.0998571	14.2704	3.35e-46	2.96e-44
PCLAF	387.27	2.46909	0.17302	14.2705	3.34e-46	2.96e-44
PTH1R	286.873	-3.22581	0.226476	-14.2435	4.92e-46	4.34e-44
CCNE1	250.18	3.59761	0.252626	14.2408	5.11e-46	4.48e-44
CDKN2C	763.604	2.29078	0.16125	14.2064	8.36e-46	7.3e-44
MAPT	329.689	3.0006	0.211524	14.1856	1.12e-45	9.76e-44
HOXA10	109.635	5.64621	0.398159	14.1808	1.2e-45	1.04e-43
RASL12	150.883	2.22953	0.157452	14.16	1.62e-45	1.39e-43
C21ORF91	346.746	-1.69657	0.119847	-14.1562	1.71e-45	1.46e-43
CENPK	111.557	2.61393	0.184764	14.1474	1.94e-45	1.65e-43
PIF1	119.787	2.75083	0.194731	14.1263	2.62e-45	2.22e-43
CLEC4G	534.031	-5.37303	0.381294	-14.0916	4.28e-45	3.61e-43
XRCC3	326.826	1.6449	0.116748	14.0893	4.42e-45	3.71e-43
MCM2	1396.4	2.40198	0.170577	14.0815	4.94e-45	4.13e-43
TP73	136.461	3.41424	0.242752	14.0647	6.26e-45	5.2e-43
CAP2	1298.73	2.26946	0.161392	14.0618	6.52e-45	5.4e-43
CTHRC1	328.052	3.99978	0.28447	14.0605	6.64e-45	5.48e-43
VIPR1	320.58	-3.46246	0.246325	-14.0565	7.03e-45	5.77e-43
RFC4	667.943	1.74309	0.124021	14.0548	7.2e-45	5.88e-43
OR51E1	24.2087	3.07118	0.218798	14.0366	9.3e-45	7.56e-43
RNASEH2A	877.323	1.88926	0.134659	14.03	1.02e-44	8.27e-43
ECT2	539.771	2.3846	0.170029	14.0246	1.1e-44	8.88e-43
SCX	46.3298	3.32233	0.237313	13.9997	1.56e-44	1.25e-42
KAT2A	2391.43	1.49902	0.107107	13.9955	1.66e-44	1.33e-42
RDM1	37.5042	3.48955	0.249348	13.9947	1.68e-44	1.34e-42
LRAT	140.769	-2.90533	0.207818	-13.9801	2.06e-44	1.63e-42
SEMA5B	192.885	2.2975	0.164456	13.9703	2.37e-44	1.87e-42
CDC37L1	1495.87	-1.57764	0.113267	-13.9285	4.25e-44	3.34e-42
NTF3	60.2347	-3.47726	0.250323	-13.8911	7.18e-44	5.61e-42
SMG5	6068.79	1.35602	0.0976587	13.8853	7.78e-44	6.05e-42
HHIPL2	134.121	5.82748	0.419713	13.8844	7.87e-44	6.09e-42
CRHBP	642.311	-4.44572	0.320282	-13.8807	8.3e-44	6.4e-42
TRIB1	5827.61	-1.98722	0.143233	-13.874	9.1e-44	6.99e-42
USP21	678.87	1.1674	0.0842262	13.8603	1.1e-43	8.42e-42
ABCC10	605.584	1.36406	0.0984686	13.8528	1.22e-43	9.32e-42
DEPDC1B	226.179	3.18268	0.229801	13.8497	1.28e-43	9.68e-42
SLC7A11	333.883	4.31947	0.312018	13.8437	1.39e-43	1.05e-41
TK1	1504.92	2.3298	0.168358	13.8384	1.5e-43	1.12e-41
GJC1	196.321	2.34322	0.169373	13.8346	1.58e-43	1.18e-41
FANCD2	317.73	2.20275	0.159837	13.7812	3.31e-43	2.46e-41
EHMT2	2311.57	1.32099	0.0959638	13.7655	4.11e-43	3.05e-41
MAD2L1	340.785	2.15341	0.156464	13.763	4.26e-43	3.14e-41
NRBF2	1122.24	-1.11033	0.0807219	-13.755	4.75e-43	3.5e-41
TBC1D31	258.968	1.38376	0.100745	13.7354	6.24e-43	4.57e-41
CHAF1B	270.052	2.57734	0.188149	13.6984	1.04e-42	7.57e-41
CENPH	187.167	1.85253	0.135543	13.6675	1.59e-42	1.15e-40
CPEB3	724.678	-2.2685	0.166473	-13.6268	2.77e-42	2.01e-40
C1RL	7180.22	-1.64351	0.120647	-13.6225	2.94e-42	2.12e-40
GNG4	482.07	5.97602	0.438937	13.6148	3.27e-42	2.35e-40
TACC3	1205.66	2.12372	0.155992	13.6143	3.29e-42	2.36e-40
FEN1	1255.57	1.62959	0.119744	13.6089	3.55e-42	2.53e-40
KIF11	349.964	2.18816	0.16096	13.5945	4.32e-42	3.07e-40
MTBP	109.12	1.85297	0.136446	13.5802	5.25e-42	3.71e-40
HDAC11	1025.44	1.76792	0.130202	13.5783	5.39e-42	3.79e-40
TMEM206	189.385	1.33456	0.0983173	13.574	5.71e-42	4.01e-40
RAD51	139.782	2.33404	0.172066	13.5648	6.47e-42	4.52e-40
COCH	234.084	4.33622	0.320592	13.5257	1.1e-41	7.65e-40
TRIM45	169.821	2.27331	0.168314	13.5063	1.44e-41	9.91e-40
KMT5C	374.67	1.50121	0.111152	13.5059	1.44e-41	9.93e-40
LIFR	877.132	-2.81065	0.208276	-13.4948	1.68e-41	1.15e-39
AFP	14465.5	6.0306	0.446959	13.4925	1.73e-41	1.18e-39
HELLS	316.866	2.40382	0.178775	13.4461	3.24e-41	2.21e-39
FSTL4	93.1782	4.3441	0.323141	13.4433	3.37e-41	2.28e-39
CDH24	144.465	2.18948	0.162969	13.435	3.77e-41	2.55e-39
EHD3	353.877	-2.14365	0.159608	-13.4308	3.99e-41	2.68e-39
SCAMP3	4687.75	1.2878	0.0959186	13.426	4.26e-41	2.85e-39
PRR11	254.409	2.48052	0.184964	13.4108	5.23e-41	3.49e-39
ROBO1	2884.36	2.89489	0.215922	13.4071	5.49e-41	3.65e-39
CSPG4	497.869	2.11137	0.157509	13.4048	5.67e-41	3.75e-39
FCN3	1315.42	-4.06989	0.303657	-13.4029	5.81e-41	3.84e-39
MARCO	784.513	-4.82801	0.360595	-13.389	7.01e-41	4.61e-39
S100P	2447.41	5.68794	0.424842	13.3884	7.07e-41	4.63e-39
KIAA1841	176.963	1.53815	0.114929	13.3834	7.56e-41	4.94e-39
FATE1	19.111	4.5724	0.341737	13.3799	7.92e-41	5.15e-39
DCUN1D3	467.79	-1.19008	0.0889517	-13.3789	8.03e-41	5.2e-39
DBH	449.884	-3.20364	0.239587	-13.3716	8.87e-41	5.73e-39
CENPU	410.728	2.1778	0.163129	13.3502	1.18e-40	7.6e-39
ZFP1	388.393	-1.71241	0.128315	-13.3454	1.26e-40	8.08e-39
MSH2	710.827	1.2933	0.0970157	13.3308	1.53e-40	9.79e-39
USP49	188.405	1.26206	0.0946858	13.3289	1.57e-40	1e-38
CEP250	1068.88	1.08729	0.0815942	13.3256	1.64e-40	1.04e-38
MEP1A	322.798	6.34491	0.476525	13.315	1.89e-40	1.2e-38
PITX1	219.714	5.65217	0.424542	13.3136	1.93e-40	1.22e-38
GPRIN1	171.117	2.60688	0.196002	13.3003	2.31e-40	1.45e-38
NQO1	7983.67	4.81683	0.362601	13.2841	2.86e-40	1.79e-38
DBF4B	198.18	1.55252	0.116969	13.2729	3.33e-40	2.07e-38
COL2A1	377.204	8.01497	0.604083	13.268	3.55e-40	2.2e-38
MRAP2	175.618	4.14596	0.31271	13.2582	4.05e-40	2.5e-38
PPOX	834.13	1.16843	0.0881573	13.2539	4.28e-40	2.64e-38
FCN2	476.863	-4.87681	0.368123	-13.2478	4.65e-40	2.86e-38
CBX2	224.933	2.69906	0.203788	13.2445	4.86e-40	2.97e-38
ZNF517	692.511	1.73279	0.13087	13.2406	5.12e-40	3.12e-38
ADRA2B	125.367	-2.22561	0.168241	-13.2287	5.99e-40	3.65e-38
MUC13	5968.48	5.1978	0.393284	13.2164	7.05e-40	4.28e-38
MCM6	1314.76	1.73972	0.131653	13.2144	7.24e-40	4.38e-38
SSX1	378.061	8.85166	0.671124	13.1893	1.01e-39	6.09e-38
TUBE1	572.074	-1.80103	0.136585	-13.1861	1.05e-39	6.33e-38
RAB3B	574.508	3.76523	0.285584	13.1843	1.08e-39	6.46e-38
PEA15	5014.03	1.17386	0.0891348	13.1695	1.31e-39	7.83e-38
MCL1	16354.9	-1.24872	0.0948481	-13.1655	1.39e-39	8.24e-38
WDR76	275.209	2.22383	0.169018	13.1574	1.54e-39	9.14e-38
HASPIN	33.8408	2.73957	0.208346	13.1491	1.72e-39	1.01e-37
FAM111B	309.573	2.59359	0.197244	13.1491	1.72e-39	1.01e-37
SIX2	42.933	6.25411	0.476491	13.1253	2.36e-39	1.38e-37
CETP	468.187	-2.77133	0.211337	-13.1133	2.76e-39	1.61e-37
AADAT	597.358	-2.79161	0.212933	-13.1103	2.88e-39	1.68e-37
AP5Z1	1641.11	1.13607	0.0867687	13.0931	3.61e-39	2.09e-37
PHLDA1	4553.63	-2.48327	0.189832	-13.0815	4.2e-39	2.43e-37
PLSCR4	1028.84	-1.92982	0.147666	-13.0688	4.96e-39	2.86e-37
CTAG2	219.341	10.3121	0.789324	13.0645	5.25e-39	3.02e-37
SEMA3F	907.909	1.27008	0.0972498	13.06	5.57e-39	3.19e-37
KIAA0907	1145.97	1.30755	0.100158	13.0549	5.96e-39	3.41e-37
DENND4B	1631.39	1.05641	0.0809298	13.0534	6.08e-39	3.46e-37
NR2C2AP	738.781	1.33806	0.102528	13.0507	6.29e-39	3.57e-37
TMEM79	282.861	1.10369	0.0847789	13.0184	9.61e-39	5.44e-37
CHAF1A	735.464	1.46603	0.112628	13.0166	9.85e-39	5.56e-37
ETS2	9787.58	-1.6882	0.129715	-13.0147	1.01e-38	5.68e-37
SOCS7	393.766	1.51805	0.116699	13.0082	1.1e-38	6.16e-37
COX7B2	232.918	9.24579	0.711477	12.9952	1.3e-38	7.28e-37
SPRY2	630.047	-1.54493	0.118942	-12.989	1.41e-38	7.87e-37
BLM	143.494	2.453	0.188946	12.9825	1.54e-38	8.54e-37
CHTF18	451.071	1.71626	0.132205	12.9818	1.55e-38	8.6e-37
PLK4	114.854	2.11229	0.162752	12.9786	1.62e-38	8.94e-37
PRIM2	352.27	1.17344	0.0904579	12.9722	1.76e-38	9.67e-37
WDHD1	182.46	1.99292	0.153785	12.9592	2.09e-38	1.14e-36
COL9A1	26.3618	3.89582	0.300953	12.9449	2.51e-38	1.37e-36
IGF2BP3	149.541	4.75127	0.36751	12.9283	3.12e-38	1.7e-36
UBAP2L	4644.6	1.0059	0.0778458	12.9216	3.4e-38	1.84e-36
TIGD5	601.323	1.61248	0.124809	12.9195	3.49e-38	1.89e-36
MAGEC2	360.042	8.69964	0.673432	12.9184	3.55e-38	1.91e-36
COLEC10	256.882	-3.92813	0.304158	-12.9148	3.72e-38	2e-36
RUSC1	949.419	1.39204	0.107796	12.9137	3.77e-38	2.02e-36
C1ORF35	857.984	1.31664	0.10211	12.8944	4.84e-38	2.58e-36
CBFA2T2	792.309	1.19213	0.0925839	12.8762	6.13e-38	3.25e-36
RAD51AP1	166.843	2.25785	0.175387	12.8735	6.34e-38	3.36e-36
MCM3	3016.14	1.54618	0.120186	12.8649	7.09e-38	3.74e-36
PIGC	1408.65	1.06805	0.0830442	12.8612	7.44e-38	3.91e-36
SPATC1L	246.076	2.92077	0.227401	12.8441	9.28e-38	4.87e-36
FANCG	437.983	1.47171	0.114603	12.8418	9.56e-38	5e-36
GBA	3508.55	1.37643	0.107359	12.8209	1.25e-37	6.51e-36
FAM72D	17.1983	3.67084	0.286488	12.8132	1.38e-37	7.17e-36
NT5DC2	1112.1	2.65088	0.207063	12.8023	1.59e-37	8.23e-36
CDC7	182.352	2.0603	0.161008	12.7963	1.72e-37	8.86e-36
LY6H	27.9477	4.4134	0.34534	12.7799	2.12e-37	1.09e-35
TINAG	218.015	7.74115	0.605748	12.7795	2.13e-37	1.09e-35
FOS	6016.02	-3.08974	0.241993	-12.7679	2.48e-37	1.27e-35
ADCY6	1312.8	1.17152	0.0917686	12.7661	2.54e-37	1.29e-35
LIN28B	88.7698	10.8785	0.852387	12.7624	2.66e-37	1.35e-35
FOXS1	105.678	2.85566	0.223762	12.762	2.67e-37	1.35e-35
OIP5	91.084	2.24272	0.175903	12.7497	3.13e-37	1.58e-35
CABYR	296.024	4.27801	0.335556	12.749	3.16e-37	1.59e-35
MAPK8IP2	442.735	3.28084	0.257791	12.7267	4.2e-37	2.11e-35
IQCC	91.396	1.48471	0.116866	12.7043	5.6e-37	2.8e-35
DCAF4L2	422.217	9.60776	0.756723	12.6965	6.18e-37	3.09e-35
C9ORF172	228.745	1.8941	0.149466	12.6724	8.41e-37	4.18e-35
RNFT2	84.9669	2.7134	0.214452	12.6527	1.08e-36	5.36e-35
LCN2	10193.7	4.75779	0.376269	12.6446	1.2e-36	5.92e-35
LYPD1	292.289	4.07935	0.322658	12.643	1.22e-36	6.03e-35
TRIM50	280.498	5.41505	0.428707	12.6311	1.42e-36	6.99e-35
CAD	1426.6	1.27346	0.100982	12.6108	1.84e-36	9e-35
TRIM11	935.424	1.13401	0.089932	12.6096	1.87e-36	9.11e-35
IL1RAP	1870.5	-2.07467	0.164828	-12.5869	2.49e-36	1.21e-34
ZNF251	560.692	1.26631	0.100609	12.5864	2.51e-36	1.22e-34
ACADS	5390.1	-1.77515	0.141307	-12.5623	3.4e-36	1.64e-34
RTL10	622.949	1.12949	0.0899662	12.5546	3.75e-36	1.8e-34
DNAJC6	204.14	2.55627	0.203685	12.5502	3.97e-36	1.9e-34
TMEM145	46.8116	3.99697	0.318637	12.544	4.29e-36	2.05e-34
DDX39A	2444.67	1.48001	0.118009	12.5415	4.43e-36	2.11e-34
DUSP6	3638.26	-1.73871	0.138659	-12.5395	4.54e-36	2.16e-34
CSMD1	110.544	6.54741	0.522368	12.5341	4.86e-36	2.3e-34
TM4SF20	305.572	7.40536	0.590978	12.5307	5.07e-36	2.4e-34
DHX34	1052.74	1.16629	0.0932062	12.513	6.34e-36	2.99e-34
CAPN11	27.0689	2.12226	0.169682	12.5073	6.81e-36	3.21e-34
TBX4	46.9473	6.84983	0.548027	12.4991	7.55e-36	3.55e-34
ALG1L	295.62	3.38638	0.270973	12.4971	7.74e-36	3.63e-34
COL6A6	20.6235	-3.34389	0.267834	-12.4849	9.02e-36	4.2e-34
NDST3	13.2618	-4.32917	0.346916	-12.479	9.72e-36	4.5e-34
KCTD7	275.885	1.30672	0.104779	12.4712	1.07e-35	4.95e-34
SGMS2	773.554	-1.79597	0.144072	-12.4658	1.15e-35	5.29e-34
LHX4	38.6983	2.55612	0.205175	12.4583	1.26e-35	5.8e-34
EPHA2	1462.72	-2.08482	0.167444	-12.4508	1.38e-35	6.33e-34
NUDT17	80.2639	1.82311	0.146549	12.4403	1.58e-35	7.2e-34
KIFC2	538.671	1.96146	0.15777	12.4324	1.74e-35	7.93e-34
HOXD8	44.1204	3.11916	0.250935	12.4302	1.79e-35	8.14e-34
RFX8	19.0922	2.78976	0.224473	12.428	1.84e-35	8.34e-34
RAD54B	76.0933	1.63695	0.131797	12.4202	2.03e-35	9.17e-34
MSH5	91.9726	2.2229	0.179021	12.417	2.11e-35	9.52e-34
UBE2S	703.342	1.98813	0.160252	12.4062	2.42e-35	1.08e-33
SPSB2	435.899	1.52344	0.122861	12.3998	2.62e-35	1.17e-33
EFNA4	437.74	1.55951	0.125903	12.3866	3.09e-35	1.38e-33
CCT3	15499.3	1.18295	0.0955298	12.3831	3.23e-35	1.44e-33
TMEM26	44.5226	-2.19037	0.176955	-12.3781	3.43e-35	1.52e-33
CLSPN	78.2982	2.79647	0.22608	12.3694	3.83e-35	1.69e-33
TRPC6	37.7035	2.085	0.168588	12.3675	3.92e-35	1.72e-33
MYD88	2292.21	-1.04338	0.0843857	-12.3644	4.07e-35	1.78e-33
COG2	1069.64	1.01888	0.0824576	12.3565	4.5e-35	1.97e-33
SPOCK1	187.896	4.38918	0.355436	12.3487	4.95e-35	2.16e-33
SIX4	56.0013	3.38593	0.274233	12.3469	5.06e-35	2.2e-33
ERFE	63.5449	2.68646	0.217585	12.3467	5.08e-35	2.2e-33
NSMCE2	992.758	1.44958	0.117422	12.345	5.18e-35	2.24e-33
CUL7	1692.41	1.15526	0.0936196	12.3399	5.52e-35	2.38e-33
CCHCR1	1371.11	1.41706	0.114842	12.3392	5.57e-35	2.4e-33
TIGD1	131.993	1.79536	0.145935	12.3024	8.79e-35	3.78e-33
TTC39A	510.125	3.16843	0.257614	12.2992	9.15e-35	3.93e-33
FAAP24	109.413	1.45843	0.118744	12.2822	1.13e-34	4.83e-33
PNRC1	4999.01	-1.43996	0.117495	-12.2554	1.57e-34	6.71e-33
SLC2A5	398.819	4.29633	0.350589	12.2546	1.59e-34	6.76e-33
MYO19	1234.9	1.20445	0.0983031	12.2524	1.63e-34	6.93e-33
TMEM201	459.06	1.31675	0.107539	12.2444	1.8e-34	7.62e-33
GLI4	666.973	1.58326	0.129306	12.2444	1.8e-34	7.62e-33
DNASE1L3	1359.27	-2.8853	0.23565	-12.244	1.81e-34	7.63e-33
MAGEB17	65.3634	6.64001	0.542464	12.2405	1.89e-34	7.95e-33
SEZ6	127.595	5.81544	0.475236	12.237	1.97e-34	8.28e-33
G6PD	1871.18	2.62195	0.214507	12.2231	2.34e-34	9.8e-33
FRMD4B	943.744	-1.36586	0.11188	-12.2083	2.81e-34	1.17e-32
REG1A	998.45	7.79875	0.6392	12.2008	3.08e-34	1.28e-32
SAPCD1	19.6481	2.8589	0.234486	12.1922	3.42e-34	1.42e-32
ARHGAP11B	77.9066	2.11791	0.173781	12.1873	3.63e-34	1.51e-32
SLCO1C1	10.8107	3.95133	0.324333	12.1829	3.83e-34	1.59e-32
VPS72	1747.33	1.07788	0.0885607	12.171	4.43e-34	1.83e-32
UPK3A	404.301	5.73543	0.471494	12.1644	4.81e-34	1.98e-32
SP6	54.4105	3.00655	0.247277	12.1586	5.16e-34	2.12e-32
CD4	2794.25	-1.95885	0.161194	-12.1522	5.59e-34	2.29e-32
TBXA2R	183.741	-1.78016	0.146683	-12.1361	6.8e-34	2.78e-32
SFN	1403.65	3.86515	0.31858	12.1324	7.11e-34	2.9e-32
PTP4A3	1241.36	2.58743	0.213276	12.1319	7.16e-34	2.92e-32
TRIM16	769.675	2.99348	0.2468	12.1292	7.4e-34	3.01e-32
KNTC1	529.694	1.92797	0.159001	12.1255	7.73e-34	3.14e-32
FBXL18	148.725	1.36208	0.112335	12.1252	7.77e-34	3.14e-32
KIAA1522	3197.83	1.51496	0.125054	12.1144	8.86e-34	3.58e-32
TPX2	1240.25	2.10903	0.174143	12.1109	9.25e-34	3.72e-32
DACH1	36.7874	-2.61315	0.21578	-12.1103	9.32e-34	3.75e-32
GABRE	825.374	2.85753	0.236108	12.1026	1.02e-33	4.1e-32
ACBD6	1357.24	1.0893	0.0900646	12.0947	1.13e-33	4.51e-32
POLD1	928.073	1.28894	0.106587	12.0929	1.15e-33	4.6e-32
ETFDH	3018.56	-1.669	0.13808	-12.0872	1.23e-33	4.91e-32
DSN1	751.704	1.27072	0.105294	12.0683	1.55e-33	6.17e-32
NOTCH3	1957.96	2.05529	0.170372	12.0636	1.64e-33	6.52e-32
ZNF219	1225.74	1.28958	0.106907	12.0626	1.66e-33	6.58e-32
SSUH2	247.649	3.89529	0.323123	12.0551	1.82e-33	7.2e-32
EGR1	7730.21	-2.59085	0.214953	-12.0531	1.87e-33	7.36e-32
CLK2	1360.76	1.04563	0.0867601	12.0519	1.89e-33	7.45e-32
C17ORF53	132.431	1.92182	0.159621	12.0399	2.19e-33	8.6e-32
MAFA	69.3729	5.84972	0.485894	12.0391	2.21e-33	8.66e-32
NAT9	1212.99	1.22382	0.101876	12.0129	3.04e-33	1.19e-31
B4GALNT2	166.264	7.17344	0.597249	12.0108	3.12e-33	1.22e-31
ZBTB21	670.512	-1.43677	0.119671	-12.006	3.3e-33	1.28e-31
SOCS6	1371.79	-1.07956	0.089992	-11.9961	3.72e-33	1.44e-31
DQX1	95.3648	6.12775	0.510995	11.9918	3.92e-33	1.52e-31
ERLIN1	3471.09	-1.29217	0.107766	-11.9905	3.99e-33	1.54e-31
DKK1	570.233	5.47417	0.457057	11.977	4.69e-33	1.81e-31
SCNM1	1167.13	1.40871	0.117706	11.9681	5.22e-33	2.01e-31
EBF1	150.406	2.00203	0.167289	11.9674	5.26e-33	2.02e-31
TMEM106C	2881.14	1.50326	0.125674	11.9616	5.65e-33	2.16e-31
PLPP3	5376.96	-1.67325	0.139896	-11.9607	5.71e-33	2.18e-31
NECAB3	1953.7	1.49047	0.124626	11.9595	5.79e-33	2.21e-31
PMFBP1	43.8614	2.76615	0.231348	11.9567	5.99e-33	2.28e-31
KCNK9	50.512	6.47356	0.541584	11.953	6.26e-33	2.38e-31
PZP	1009.66	-4.33105	0.362396	-11.9511	6.4e-33	2.43e-31
LIN37	156.708	1.00207	0.0838507	11.9507	6.44e-33	2.44e-31
NELFE	3139.3	1.35236	0.113194	11.9472	6.72e-33	2.53e-31
CHEK1	337.426	1.64998	0.138166	11.942	7.15e-33	2.69e-31
CXCL12	3321.78	-2.66039	0.222841	-11.9385	7.46e-33	2.8e-31
EDIL3	255.784	2.58422	0.216519	11.9353	7.75e-33	2.91e-31
PAGE4	436.365	7.51549	0.630735	11.9154	9.83e-33	3.68e-31
SF3B4	3416	1.06648	0.0895515	11.9091	1.06e-32	3.96e-31
ASB16	38.7101	2.09677	0.176075	11.9084	1.07e-32	3.99e-31
ZNF775	777.229	1.64867	0.138513	11.9026	1.15e-32	4.26e-31
LEF1	289.683	2.97139	0.249915	11.8896	1.34e-32	4.97e-31
LYVE1	422.528	-2.96387	0.249853	-11.8625	1.85e-32	6.85e-31
C8ORF4	2367.02	-2.25336	0.189966	-11.8619	1.87e-32	6.89e-31
GABRQ	15.9019	4.63786	0.391019	11.861	1.89e-32	6.95e-31
CTSV	135.193	3.82597	0.322613	11.8593	1.93e-32	7.07e-31
DNAH14	295.581	1.28219	0.108245	11.8452	2.28e-32	8.35e-31
NUDT1	465.789	1.84059	0.155415	11.8431	2.34e-32	8.55e-31
MCM4	2030.1	1.62543	0.137267	11.8414	2.38e-32	8.7e-31
KIAA1524	139.628	2.16008	0.182575	11.8311	2.69e-32	9.81e-31
BAIAP2L2	570.051	3.00517	0.254266	11.819	3.11e-32	1.13e-30
TMC7	98.5862	2.14591	0.181645	11.8138	3.31e-32	1.2e-30
RNF152	1813.21	-1.80649	0.15316	-11.7948	4.15e-32	1.5e-30
RHNO1	509.101	1.14824	0.0973648	11.7931	4.23e-32	1.53e-30
CDCA7	182.983	3.72987	0.316427	11.7874	4.53e-32	1.63e-30
CCDC34	488.588	1.67156	0.141821	11.7864	4.59e-32	1.65e-30
ZBTB12	137.486	1.88945	0.16031	11.7862	4.6e-32	1.65e-30
LOXL2	646.261	1.63514	0.138841	11.777	5.13e-32	1.83e-30
SCRIB	4290.05	1.33052	0.113038	11.7706	5.54e-32	1.97e-30
TAZ	1141.01	1.06962	0.0909261	11.7636	6.01e-32	2.13e-30
FOXK1	891.681	1.22938	0.104507	11.7636	6.01e-32	2.13e-30
COLCA2	119.283	2.74832	0.233901	11.7499	7.07e-32	2.5e-30
NAAA	1036.06	-1.64147	0.139739	-11.7467	7.34e-32	2.59e-30
KLHL15	608.08	-1.35545	0.11542	-11.7436	7.62e-32	2.68e-30
POLA2	610.962	1.29536	0.110581	11.7141	1.08e-31	3.79e-30
RAB11FIP4	1639.68	1.83962	0.157053	11.7133	1.09e-31	3.81e-30
OSBPL3	366.576	1.7659	0.150887	11.7035	1.22e-31	4.27e-30
ABCC5	686.297	1.09274	0.0933764	11.7025	1.24e-31	4.31e-30
SPP1	29494.7	4.29454	0.367277	11.6929	1.39e-31	4.81e-30
GPR182	70.3643	-3.36097	0.287433	-11.693	1.38e-31	4.81e-30
CRYBG2	143.588	2.56079	0.219043	11.6908	1.42e-31	4.92e-30
LIN9	179.287	1.54713	0.132337	11.6908	1.42e-31	4.92e-30
SAPCD2	137.297	2.75828	0.235981	11.6886	1.46e-31	5.04e-30
WNK4	318.771	3.7471	0.321039	11.6718	1.78e-31	6.12e-30
PIMREG	71.9259	3.15922	0.270694	11.6708	1.8e-31	6.17e-30
TESMIN	111.254	2.32445	0.199165	11.671	1.79e-31	6.17e-30
PXDNL	23.313	2.65271	0.227364	11.6672	1.87e-31	6.42e-30
PIGU	1214.91	1.14013	0.0977792	11.6603	2.03e-31	6.94e-30
RTKN2	70.864	2.85314	0.244815	11.6543	2.18e-31	7.44e-30
FANCE	164.559	1.66434	0.142889	11.6478	2.35e-31	8e-30
ZC2HC1C	196.946	-1.40471	0.120604	-11.6473	2.37e-31	8.04e-30
LYPD8	55.4778	4.95126	0.425323	11.6412	2.55e-31	8.62e-30
SLC38A2	11778.6	-1.64049	0.140947	-11.639	2.61e-31	8.82e-30
MAGEC1	175.09	8.72035	0.749806	11.6301	2.9e-31	9.75e-30
TEX19	10.1837	4.80876	0.413738	11.6227	3.16e-31	1.06e-29
ZNF696	336.1	1.21648	0.104668	11.6223	3.17e-31	1.07e-29
KIF24	99.3611	1.8772	0.161547	11.6201	3.26e-31	1.09e-29
DSCR8	60.9425	8.06965	0.694844	11.6136	3.51e-31	1.17e-29
COL4A1	9073.4	1.78175	0.153463	11.6103	3.65e-31	1.22e-29
MAST2	1275.61	1.06413	0.0917908	11.593	4.47e-31	1.49e-29
HAUS5	609.737	1.01695	0.0877858	11.5844	4.94e-31	1.64e-29
CCDC28B	253.261	2.38571	0.206042	11.5787	5.28e-31	1.75e-29
ITPKA	373.759	2.58574	0.223375	11.5758	5.47e-31	1.81e-29
ZADH2	1165.75	-1.05774	0.0913797	-11.5753	5.5e-31	1.82e-29
LCAT	3653.13	-2.54387	0.219775	-11.5749	5.52e-31	1.82e-29
RASGRF2	279.968	1.87034	0.161654	11.57	5.85e-31	1.92e-29
OSR2	68.2279	4.17431	0.3608	11.5696	5.88e-31	1.93e-29
ZNF330	1064.51	-1.01444	0.0878148	-11.5521	7.2e-31	2.36e-29
LILRA2	59.5564	-1.95485	0.169256	-11.5497	7.41e-31	2.42e-29
HSF4	438.342	1.80823	0.156649	11.5432	7.99e-31	2.61e-29
C8ORF33	2386.69	1.29175	0.111971	11.5365	8.64e-31	2.82e-29
MAP2K3	2988.26	-1.24998	0.108386	-11.5327	9.03e-31	2.94e-29
IRAK1	5175.12	1.31014	0.11366	11.5269	9.66e-31	3.14e-29
IQCD	62.0646	2.7276	0.236716	11.5227	1.01e-30	3.29e-29
TSSK6	85.1188	1.38009	0.119828	11.5172	1.08e-30	3.49e-29
KPNA2	2483.28	1.41808	0.12321	11.5095	1.18e-30	3.81e-29
BCO2	553.379	-3.1007	0.26971	-11.4964	1.37e-30	4.41e-29
RNF157	745.059	2.57057	0.223742	11.489	1.5e-30	4.79e-29
CD302	1418.53	-1.68826	0.146945	-11.489	1.5e-30	4.79e-29
MAGEB2	105.787	9.81547	0.854663	11.4846	1.58e-30	5.04e-29
STRIP2	98.0616	2.64316	0.230153	11.4844	1.58e-30	5.04e-29
GHR	3670.8	-2.4632	0.214545	-11.481	1.64e-30	5.23e-29
FLAD1	2414.45	1.03508	0.0901711	11.479	1.68e-30	5.34e-29
ARHGAP33	255.206	1.55758	0.135799	11.4697	1.87e-30	5.94e-29
OTUB2	107.408	1.56955	0.136961	11.4598	2.1e-30	6.63e-29
ENAH	3178.29	1.55879	0.136043	11.458	2.14e-30	6.76e-29
TCF15	31.2945	2.35807	0.205846	11.4555	2.21e-30	6.95e-29
LAMA4	1094.85	1.52904	0.133542	11.4499	2.35e-30	7.38e-29
SEPT3	64.0616	3.13396	0.274161	11.4311	2.92e-30	9.15e-29
SLC39A14	17623.4	-1.6447	0.143906	-11.429	3e-30	9.35e-29
PRAME	391.589	6.78565	0.59401	11.4235	3.19e-30	9.95e-29
ZFP36L1	11056.7	-1.10272	0.096552	-11.421	3.28e-30	1.02e-28
PDIA2	56.2655	4.71213	0.412729	11.417	3.44e-30	1.07e-28
AHSA2	924.466	1.36007	0.119191	11.4109	3.69e-30	1.14e-28
EGR2	203.893	-2.54459	0.223081	-11.4066	3.88e-30	1.2e-28
CLEC1B	151.054	-5.18616	0.454765	-11.404	3.99e-30	1.23e-28
ZKSCAN3	333.689	1.42765	0.125216	11.4015	4.11e-30	1.27e-28
ASIC1	132.887	3.32508	0.291849	11.3931	4.52e-30	1.39e-28
YEATS2	687.097	1.04445	0.0917138	11.3882	4.79e-30	1.46e-28
LRRC4	39.5067	-1.87985	0.165091	-11.3868	4.87e-30	1.49e-28
MRO	143.356	-2.31533	0.203364	-11.3852	4.96e-30	1.51e-28
RPS6KL1	235.664	2.02962	0.178367	11.3789	5.33e-30	1.62e-28
ACAN	76.7929	3.63892	0.319836	11.3775	5.41e-30	1.64e-28
NOL12	169.203	1.16516	0.102463	11.3715	5.8e-30	1.76e-28
TRIM59	91.9924	1.93655	0.170317	11.3702	5.88e-30	1.78e-28
FOXO1	1577.05	-1.72307	0.151603	-11.3656	6.2e-30	1.87e-28
ADAM15	3673.26	1.33398	0.117402	11.3625	6.43e-30	1.94e-28
MAP3K9	264.884	1.3111	0.11539	11.3623	6.44e-30	1.94e-28
TCOF1	1720.86	1.07272	0.0944879	11.353	7.17e-30	2.14e-28
PVALB	15.2684	-3.64813	0.321371	-11.3518	7.27e-30	2.17e-28
NMB	208.016	2.19283	0.193184	11.351	7.33e-30	2.18e-28
ELFN2	301.747	3.72344	0.328193	11.3453	7.83e-30	2.33e-28
SIGLEC7	70.709	-2.03662	0.179518	-11.3449	7.86e-30	2.33e-28
ATAD2	2059.68	1.70761	0.150614	11.3377	8.54e-30	2.53e-28
KCNN2	191.927	-3.45188	0.304621	-11.3317	9.14e-30	2.7e-28
GPSM2	216.787	1.58392	0.139787	11.331	9.22e-30	2.72e-28
PANK1	2534.96	-1.57699	0.139175	-11.3309	9.22e-30	2.72e-28
RFX5	1492.43	1.17033	0.103304	11.3289	9.43e-30	2.77e-28
PLK3	395.592	-1.59719	0.141058	-11.3229	1.01e-29	2.96e-28
CSPG5	63.5132	2.51638	0.222262	11.3217	1.02e-29	3e-28
ATAD5	131.517	1.63602	0.144505	11.3216	1.03e-29	3e-28
NCOR1	2772.77	-1.13924	0.100634	-11.3206	1.04e-29	3.03e-28
COA6	1485.65	1.28477	0.113545	11.3151	1.1e-29	3.22e-28
FAM57B	11.2804	4.06735	0.359799	11.3045	1.25e-29	3.62e-28
MATN3	69.3639	4.00317	0.354201	11.302	1.28e-29	3.72e-28
ARHGEF11	2321.24	1.14352	0.101179	11.302	1.28e-29	3.72e-28
CDCA4	282.007	1.40617	0.124419	11.3019	1.28e-29	3.72e-28
TRAF2	1201.48	1.17774	0.104225	11.2999	1.31e-29	3.79e-28
GAD1	38.2913	4.75217	0.420555	11.2998	1.32e-29	3.8e-28
IGSF3	631.804	2.55393	0.226163	11.2924	1.43e-29	4.12e-28
ACLY	4172.66	1.04339	0.0924294	11.2885	1.5e-29	4.3e-28
SULT1C2	763.58	3.59519	0.318507	11.2876	1.51e-29	4.34e-28
HAGHL	103.189	2.85574	0.253187	11.2791	1.66e-29	4.77e-28
PAQR4	303.227	1.99328	0.176743	11.2778	1.69e-29	4.83e-28
44989	8.33049	3.85808	0.342661	11.2592	2.09e-29	5.96e-28
SLC35D1	3755.64	-1.36203	0.121064	-11.2505	2.3e-29	6.57e-28
DYNC1I1	257.02	3.83549	0.340978	11.2485	2.36e-29	6.71e-28
CKS1B	1084.22	1.25216	0.111358	11.2445	2.47e-29	7.01e-28
PAMR1	195.671	-2.16133	0.192324	-11.2379	2.66e-29	7.54e-28
AKR1C3	16213.2	1.61086	0.143394	11.2338	2.78e-29	7.88e-28
C1QL1	355.219	3.91029	0.348102	11.2332	2.8e-29	7.93e-28
SUCO	1587.84	1.12155	0.0999003	11.2267	3.01e-29	8.52e-28
PHACTR3	7.7651	-2.91395	0.259579	-11.2257	3.05e-29	8.6e-28
MCM7	3750.21	1.49588	0.133482	11.2066	3.78e-29	1.06e-27
EPPK1	454.484	3.36587	0.30048	11.2016	4e-29	1.12e-27
BICDL1	550.595	2.2841	0.204007	11.1962	4.26e-29	1.19e-27
S100A12	11.8518	-2.96569	0.264908	-11.1952	4.31e-29	1.21e-27
SPINK5	76.6303	3.24315	0.289718	11.1942	4.35e-29	1.22e-27
MCM5	2523.88	1.40824	0.125831	11.1915	4.49e-29	1.25e-27
MESP1	126.538	2.00164	0.178868	11.1906	4.53e-29	1.26e-27
NAA40	501.512	1.08635	0.0970939	11.1886	4.63e-29	1.29e-27
GPR158	138.356	3.39907	0.30406	11.1789	5.17e-29	1.44e-27
C5ORF46	27.9331	3.85002	0.344635	11.1713	5.64e-29	1.56e-27
DTYMK	1169.23	1.32889	0.119007	11.1664	5.95e-29	1.65e-27
LARP1B	1310.15	-1.12033	0.100336	-11.1658	6e-29	1.66e-27
IL1RL1	79.6411	-3.4417	0.308351	-11.1616	6.28e-29	1.73e-27
CD200	139.663	1.86813	0.167376	11.1613	6.31e-29	1.74e-27
GABBR2	126.312	5.0001	0.448276	11.1541	6.84e-29	1.88e-27
FAM222A	631.677	1.73882	0.155908	11.1528	6.94e-29	1.9e-27
PRND	36.3705	4.02505	0.3611	11.1467	7.43e-29	2.04e-27
PRPF3	1468.05	1.00016	0.0897458	11.1444	7.63e-29	2.09e-27
CCBE1	99.9637	-3.50028	0.314327	-11.1358	8.4e-29	2.29e-27
MPC1	4211.01	-1.52959	0.137452	-11.1282	9.15e-29	2.49e-27
RIBC2	53.9409	2.97469	0.267341	11.1269	9.28e-29	2.52e-27
GPR19	21.2541	2.5447	0.228774	11.1232	9.67e-29	2.63e-27
IQCE	647.666	1.16656	0.104885	11.1223	9.78e-29	2.65e-27
LIG1	1304.81	1.14043	0.102538	11.1221	9.8e-29	2.65e-27
HCN2	79.6511	3.31486	0.298059	11.1215	9.86e-29	2.66e-27
NETO2	133.337	2.27228	0.204427	11.1154	1.06e-28	2.85e-27
CCNE2	94.1408	2.08565	0.187764	11.1078	1.15e-28	3.09e-27
LDLRAD1	136.772	4.16653	0.375168	11.1058	1.18e-28	3.16e-27
NCAPD2	1248.31	1.41751	0.127659	11.1039	1.2e-28	3.22e-27
PSMC3IP	79.0621	1.59522	0.143711	11.1002	1.25e-28	3.34e-27
MRPL53	130.427	1.00504	0.090575	11.0962	1.31e-28	3.49e-27
CDC25A	179.598	2.14182	0.193032	11.0957	1.32e-28	3.5e-27
SLC7A6	167.008	1.80374	0.162625	11.0914	1.38e-28	3.67e-27
FOXD2	109.929	2.09837	0.189225	11.0893	1.41e-28	3.75e-27
EGFL6	15.2596	4.1618	0.375298	11.0893	1.41e-28	3.75e-27
THEM5	149.662	1.74896	0.157748	11.087	1.45e-28	3.84e-27
CCL25	200.973	4.42746	0.399383	11.0858	1.47e-28	3.89e-27
ACTN2	322.091	4.19163	0.378164	11.0841	1.5e-28	3.95e-27
SSR2	12109.5	1.21614	0.10977	11.0789	1.59e-28	4.18e-27
CST1	117.409	7.06597	0.637805	11.0786	1.59e-28	4.19e-27
ADRA2C	254.857	3.32582	0.300214	11.0781	1.6e-28	4.21e-27
TRIM65	645.591	1.04754	0.0947072	11.0608	1.94e-28	5.09e-27
TLDC2	116.858	2.33126	0.210918	11.0529	2.12e-28	5.55e-27
CENPO	279.198	1.55785	0.141007	11.048	2.24e-28	5.85e-27
LILRA5	75.7932	-2.14476	0.194236	-11.042	2.4e-28	6.25e-27
SNRPE	2501.15	1.20171	0.108839	11.0412	2.42e-28	6.29e-27
SMG9	969.067	1.18875	0.107674	11.0402	2.44e-28	6.35e-27
ZNF707	378.34	1.00685	0.0912075	11.0391	2.47e-28	6.42e-27
ZNF605	413.622	1.11675	0.101174	11.0379	2.51e-28	6.5e-27
GLDN	209.392	3.83826	0.347861	11.0339	2.62e-28	6.79e-27
GPAA1	10434.4	1.43775	0.130313	11.033	2.65e-28	6.85e-27
PXDC1	5442.36	-1.33928	0.121408	-11.0312	2.7e-28	6.96e-27
N4BP2L1	1263.57	-1.44689	0.131168	-11.0308	2.71e-28	6.98e-27
RASGEF1B	1045.99	-1.83179	0.166119	-11.027	2.83e-28	7.28e-27
MAGEA6	335.194	8.16876	0.740974	11.0244	2.92e-28	7.48e-27
CRIP3	337.446	2.14508	0.194604	11.0228	2.97e-28	7.6e-27
SIGLEC11	48.1421	-2.31742	0.210439	-11.0123	3.33e-28	8.53e-27
FBXL19	374.316	1.08002	0.0981047	11.0089	3.46e-28	8.85e-27
RAB24	394.095	1.07889	0.0980193	11.0069	3.54e-28	9.03e-27
MSH5-SAPCD1	38.3266	1.81277	0.164727	11.0047	3.63e-28	9.24e-27
N4BP3	84.261	1.99861	0.181633	11.0036	3.67e-28	9.34e-27
CNIH4	1619.22	1.10009	0.0999822	11.0028	3.7e-28	9.41e-27
ID2	8062.11	-1.44998	0.131919	-10.9915	4.2e-28	1.07e-26
CYP17A1	3257.05	4.21336	0.383334	10.9914	4.21e-28	1.07e-26
MTHFD1L	517.711	1.53325	0.139501	10.991	4.22e-28	1.07e-26
SOGA1	736.945	1.48778	0.135383	10.9894	4.3e-28	1.09e-26
FBF1	128.754	1.43816	0.130936	10.9837	4.58e-28	1.15e-26
KRTCAP2	1409.51	1.18663	0.108043	10.983	4.61e-28	1.16e-26
KDM8	1329.95	-2.41515	0.219972	-10.9793	4.8e-28	1.21e-26
EMX1	76.068	3.86544	0.352111	10.9779	4.88e-28	1.22e-26
NDRG2	9957.08	-1.50222	0.136895	-10.9735	5.12e-28	1.28e-26
CSMD2	69.996	3.11896	0.284232	10.9733	5.14e-28	1.28e-26
NDOR1	366.355	1.0186	0.0928644	10.9687	5.41e-28	1.35e-26
EVX1	13.5434	5.74712	0.524135	10.965	5.63e-28	1.4e-26
GSTZ1	2549.91	-2.00942	0.183262	-10.9647	5.65e-28	1.4e-26
ALDH2	43900.4	-1.67442	0.152777	-10.9599	5.96e-28	1.48e-26
SMC1B	47.6193	3.75838	0.342935	10.9594	5.99e-28	1.49e-26
PDGFA	1051.18	1.97361	0.180118	10.9573	6.13e-28	1.52e-26
SERTAD1	868.589	-1.54407	0.141028	-10.9487	6.74e-28	1.67e-26
ACADSB	12477.3	-1.76418	0.16127	-10.9393	7.48e-28	1.85e-26
FANCB	19.1164	2.27195	0.207708	10.9382	7.57e-28	1.87e-26
GATS	313.557	1.56709	0.143407	10.9276	8.51e-28	2.09e-26
UBD	3307.71	2.58435	0.236594	10.9231	8.93e-28	2.2e-26
C1R	65879.1	-1.76001	0.161151	-10.9215	9.1e-28	2.23e-26
TCF3	1488.45	1.0474	0.0959098	10.9207	9.18e-28	2.25e-26
MYCN	110.535	3.70714	0.339608	10.9159	9.67e-28	2.36e-26
ZC3H3	1563.01	1.13814	0.104269	10.9154	9.73e-28	2.37e-26
C21ORF62	5.76047	-2.79636	0.256375	-10.9073	1.06e-27	2.58e-26
LDLR	5135.96	-1.52914	0.140219	-10.9054	1.09e-27	2.63e-26
SCN4A	79.6475	2.11749	0.194241	10.9013	1.14e-27	2.75e-26
PLOD3	5813.92	1.0446	0.0958414	10.8992	1.16e-27	2.81e-26
ODAM	191.122	7.14821	0.656311	10.8915	1.27e-27	3.05e-26
ALDH3A1	4750.29	4.90521	0.450408	10.8906	1.28e-27	3.08e-26
PLPPR2	1252.35	1.187	0.109031	10.8868	1.33e-27	3.2e-26
KLC2	618.172	1.14229	0.104953	10.8838	1.38e-27	3.31e-26
JCAD	968.925	1.76161	0.161966	10.8765	1.49e-27	3.58e-26
MYO1A	143.721	3.03829	0.279418	10.8737	1.54e-27	3.69e-26
CYP2C19	125.323	-3.70675	0.34091	-10.8731	1.55e-27	3.7e-26
PPP4R3CP	63.3181	8.62028	0.793142	10.8685	1.63e-27	3.89e-26
TMEM132A	587.509	2.68515	0.247169	10.8636	1.72e-27	4.1e-26
ASIC3	68.2628	2.0096	0.185122	10.8555	1.88e-27	4.47e-26
FAM72C	11.8093	3.2423	0.29874	10.8532	1.93e-27	4.58e-26
RFPL4B	44.7333	8.00269	0.738237	10.8403	2.22e-27	5.26e-26
TLX1	156.397	2.85122	0.263038	10.8396	2.24e-27	5.3e-26
GOLGA8B	837.176	1.63663	0.151135	10.8289	2.51e-27	5.93e-26
RBP7	506.588	2.01092	0.185751	10.8259	2.6e-27	6.13e-26
CBX8	492.986	1.19795	0.110679	10.8236	2.66e-27	6.26e-26
FERMT2	2669.21	-1.07357	0.0992687	-10.8147	2.93e-27	6.89e-26
CACYBP	2411.06	1.05916	0.0980132	10.8063	3.21e-27	7.54e-26
TIMD4	78.057	-3.43716	0.318189	-10.8022	3.36e-27	7.87e-26
FAM133A	144.869	5.38195	0.498381	10.7989	3.49e-27	8.16e-26
LPL	158.649	2.07528	0.192286	10.7927	3.73e-27	8.72e-26
PYGB	3423.03	1.42381	0.131928	10.7923	3.74e-27	8.74e-26
HSF2BP	16.6085	2.13766	0.198077	10.7921	3.75e-27	8.75e-26
DNMT3A	1068.79	1.30511	0.121033	10.7831	4.14e-27	9.63e-26
AGL	1864.97	-1.49818	0.13896	-10.7814	4.22e-27	9.79e-26
COL7A1	756.659	3.21599	0.298312	10.7806	4.25e-27	9.86e-26
PEG10	8096.9	4.59943	0.426806	10.7764	4.45e-27	1.03e-25
ARHGAP39	187.526	1.56344	0.145084	10.7761	4.46e-27	1.03e-25
POLE2	194.332	1.61433	0.149828	10.7745	4.54e-27	1.05e-25
KIF19	25.8924	-2.39406	0.222196	-10.7745	4.54e-27	1.05e-25
FOSB	1988.89	-3.21534	0.298434	-10.774	4.57e-27	1.05e-25
EFNA3	137.47	2.12924	0.197744	10.7677	4.89e-27	1.12e-25
GINS2	365.89	1.78294	0.165668	10.7622	5.19e-27	1.19e-25
CYR61	3079.64	-1.98847	0.184794	-10.7605	5.29e-27	1.21e-25
BCKDHB	1580.05	-1.51359	0.140724	-10.7558	5.57e-27	1.27e-25
IER2	3370.86	-1.3231	0.123034	-10.7539	5.68e-27	1.3e-25
SNRPB	6292.61	1.16851	0.108668	10.753	5.74e-27	1.31e-25
TAPT1	1615.86	-1.03074	0.0959454	-10.743	6.4e-27	1.46e-25
SLC38A6	390.634	1.19505	0.111275	10.7396	6.63e-27	1.51e-25
PABPC1L	952.043	1.70296	0.158585	10.7385	6.71e-27	1.52e-25
FXN	637.523	-1.17966	0.109866	-10.7373	6.8e-27	1.54e-25
CYP26A1	258.653	-3.8631	0.359818	-10.7363	6.88e-27	1.55e-25
REEP2	53.0216	3.09268	0.288063	10.7361	6.89e-27	1.56e-25
ACYP1	116.774	1.1312	0.105459	10.7264	7.65e-27	1.72e-25
H2AFZ	4271.53	1.17372	0.109423	10.7264	7.65e-27	1.72e-25
MROH1	1807.47	1.34009	0.125002	10.7206	8.15e-27	1.83e-25
AC092821.1	15.8516	2.49128	0.23239	10.7203	8.18e-27	1.84e-25
COL24A1	45.5088	4.01843	0.374934	10.7177	8.41e-27	1.89e-25
LRRC1	448.87	2.33491	0.217936	10.7137	8.78e-27	1.97e-25
BRSK1	111.857	1.79877	0.167983	10.7081	9.33e-27	2.09e-25
FAHD2A	1606.28	-1.14317	0.106806	-10.7032	9.83e-27	2.19e-25
GNE	4178.72	-1.57113	0.146791	-10.7032	9.84e-27	2.19e-25
LAMC1	6204.36	1.39001	0.129949	10.6966	1.06e-26	2.35e-25
PAEP	124.383	7.10148	0.663971	10.6955	1.07e-26	2.38e-25
TLCD1	573.494	1.64737	0.154075	10.692	1.11e-26	2.47e-25
TYMS	851.839	1.78458	0.167042	10.6834	1.22e-26	2.7e-25
HMGA1	3599.58	1.72132	0.161141	10.6821	1.23e-26	2.73e-25
GINS3	156.264	1.41601	0.132618	10.6773	1.3e-26	2.87e-25
PODXL	1685.42	1.59109	0.14905	10.6748	1.34e-26	2.95e-25
DGKI	21.1209	2.19479	0.205617	10.6742	1.34e-26	2.97e-25
RBM24	257.531	2.55036	0.238936	10.6738	1.35e-26	2.97e-25
ACAA1	10889.7	-1.52475	0.142952	-10.6662	1.47e-26	3.22e-25
ZNF789	244.398	1.04498	0.0980126	10.6617	1.54e-26	3.37e-25
CD109	567.477	2.45946	0.230916	10.6509	1.73e-26	3.78e-25
NPEPL1	434.746	1.18948	0.111678	10.651	1.73e-26	3.78e-25
MS4A6A	1189.38	-1.81098	0.170072	-10.6484	1.77e-26	3.88e-25
ZBED8	129.258	1.23667	0.11615	10.6472	1.8e-26	3.92e-25
LILRB5	357.16	-1.91607	0.179987	-10.6456	1.83e-26	3.98e-25
ADM2	740.507	2.19296	0.206062	10.6422	1.9e-26	4.13e-25
NANOS1	67.4141	2.67769	0.251629	10.6414	1.91e-26	4.15e-25
MAFG	874.429	1.28683	0.120939	10.6403	1.94e-26	4.2e-25
SOCS2	1087.55	-2.18461	0.20535	-10.6385	1.97e-26	4.27e-25
JAG2	523.062	1.69001	0.158946	10.6326	2.1e-26	4.55e-25
PNCK	59.0204	5.74568	0.540789	10.6246	2.29e-26	4.95e-25
GPM6A	116.632	-3.1268	0.294341	-10.6231	2.33e-26	5.02e-25
SNCG	861.494	3.13756	0.295399	10.6214	2.37e-26	5.1e-25
IL1RN	3318.42	-2.12728	0.20035	-10.6178	2.46e-26	5.29e-25
IL3RA	294.285	1.27712	0.12032	10.6143	2.56e-26	5.48e-25
CLEC4M	217.64	-5.56225	0.524104	-10.6129	2.6e-26	5.56e-25
SERPINB9	612.208	-1.59887	0.150705	-10.6093	2.7e-26	5.77e-25
HSPB1	24572.4	1.67797	0.158276	10.6016	2.93e-26	6.25e-25
FBXW10	61.1088	4.22475	0.39876	10.5947	3.15e-26	6.71e-25
CENPJ	225.438	1.25735	0.118679	10.5946	3.16e-26	6.71e-25
AC007906.2	24.5422	-2.51192	0.237165	-10.5915	3.26e-26	6.93e-25
ITGA6	2771.37	1.4026	0.132487	10.5867	3.44e-26	7.28e-25
HRCT1	404.933	2.85978	0.2702	10.5839	3.54e-26	7.49e-25
MAGEA3	398.228	7.14368	0.675011	10.583	3.57e-26	7.55e-25
NPFFR2	56.329	6.28496	0.593877	10.5829	3.58e-26	7.55e-25
FIBCD1	18.389	5.41879	0.512369	10.5759	3.85e-26	8.13e-25
TRIM7	54.4719	2.5385	0.240069	10.574	3.93e-26	8.28e-25
TP53I3	1391.59	1.84992	0.174998	10.5711	4.06e-26	8.53e-25
TUBG1	1576.72	1.08548	0.102691	10.5703	4.09e-26	8.59e-25
PDLIM5	4076.74	-1.08543	0.102707	-10.5682	4.19e-26	8.78e-25
TSEN54	1198.82	1.04694	0.0991345	10.5608	4.53e-26	9.48e-25
CTNNA2	361.139	5.87518	0.556442	10.5585	4.64e-26	9.71e-25
COL4A2	10268	1.64702	0.156067	10.5533	4.9e-26	1.02e-24
IGFBP3	10709.8	-1.97379	0.187084	-10.5503	5.06e-26	1.06e-24
STXBP6	526.363	1.66096	0.157459	10.5485	5.16e-26	1.08e-24
STX1A	100.283	1.57032	0.149098	10.5322	6.14e-26	1.27e-24
P4HA2	1535.22	1.45019	0.137738	10.5286	6.38e-26	1.32e-24
MMAA	901.658	-1.17401	0.111512	-10.5281	6.41e-26	1.32e-24
EBF3	41.6437	2.29019	0.217547	10.5274	6.46e-26	1.33e-24
COL22A1	144.868	4.37302	0.415869	10.5154	7.34e-26	1.51e-24
CCDC71L	1329.45	-1.74412	0.165881	-10.5143	7.42e-26	1.52e-24
DDIAS	94.4395	1.56214	0.148584	10.5136	7.48e-26	1.53e-24
B3GNTL1	263.336	1.47943	0.14085	10.5036	8.32e-26	1.7e-24
ADGRG7	265.377	-2.68575	0.255718	-10.5028	8.39e-26	1.71e-24
MIOX	48.1696	4.08528	0.388982	10.5025	8.41e-26	1.72e-24
ITGA9	659.318	-1.82482	0.173796	-10.4998	8.66e-26	1.76e-24
GSDMC	18.4451	3.49745	0.333094	10.4999	8.65e-26	1.76e-24
PHF19	525.83	1.43863	0.13712	10.4918	9.43e-26	1.91e-24
TPM2	2047.08	1.93681	0.18464	10.4897	9.64e-26	1.95e-24
CERS1	37.7308	4.50124	0.429255	10.4862	1e-25	2.02e-24
SLC30A3	40.8243	3.77464	0.360113	10.4818	1.05e-25	2.11e-24
HMGB2	1939.04	1.37403	0.131139	10.4776	1.09e-25	2.2e-24
SEZ6L2	1572.88	3.45821	0.330067	10.4773	1.1e-25	2.21e-24
PGM1	8705.93	-1.25242	0.119571	-10.4743	1.13e-25	2.28e-24
SLC22A11	824.656	4.23107	0.403956	10.4741	1.14e-25	2.28e-24
GADD45B	7603.95	-1.93132	0.184394	-10.4739	1.14e-25	2.28e-24
WHRN	356.756	1.47416	0.140901	10.4623	1.29e-25	2.57e-24
MAMSTR	61.0022	2.04332	0.195369	10.4588	1.34e-25	2.67e-24
IVD	8339.57	-1.21197	0.115941	-10.4533	1.41e-25	2.82e-24
FAM83H	4560.51	1.48405	0.142019	10.4496	1.47e-25	2.93e-24
PI15	72.6122	3.72256	0.356311	10.4475	1.5e-25	3e-24
PSPH	1000.82	1.46439	0.140211	10.4442	1.56e-25	3.1e-24
DBT	1713.29	-1.11156	0.106437	-10.4433	1.57e-25	3.12e-24
JUN	7874.74	-1.54595	0.148046	-10.4424	1.59e-25	3.15e-24
C8ORF44	97.7802	1.23422	0.118216	10.4404	1.62e-25	3.21e-24
CHGA	26.3632	5.2112	0.499294	10.4371	1.68e-25	3.32e-24
SLC6A8	1312.23	2.92055	0.279837	10.4366	1.69e-25	3.33e-24
NFIL3	2401.5	-1.42306	0.136388	-10.4339	1.74e-25	3.43e-24
ETV4	937.858	3.01685	0.289221	10.431	1.79e-25	3.53e-24
KCNU1	128.096	7.38068	0.707595	10.4307	1.8e-25	3.54e-24
MAGEA12	213.388	7.81384	0.749539	10.4249	1.91e-25	3.75e-24
FUT2	115.868	3.00839	0.288596	10.4242	1.92e-25	3.77e-24
MTHFD2L	409.909	-1.40108	0.134414	-10.4236	1.93e-25	3.79e-24
DNMT3B	125.958	1.69771	0.163046	10.4125	2.17e-25	4.26e-24
NSD2	1463.86	1.11749	0.107355	10.4094	2.25e-25	4.39e-24
HPS5	1632.32	-1.53031	0.147114	-10.4022	2.42e-25	4.73e-24
GNPNAT1	2021.6	-1.0874	0.104583	-10.3975	2.54e-25	4.96e-24
ARID3A	785.246	2.52725	0.243087	10.3965	2.57e-25	5.01e-24
KCP	51.3372	2.70224	0.259971	10.3944	2.63e-25	5.12e-24
LILRA1	33.9906	-1.72227	0.165698	-10.394	2.64e-25	5.13e-24
HIST1H4H	51.3923	2.61301	0.251516	10.389	2.78e-25	5.4e-24
DYDC2	93.4134	3.48287	0.335276	10.3881	2.81e-25	5.45e-24
C4ORF46	155.98	1.15914	0.111634	10.3834	2.95e-25	5.72e-24
EME2	314.983	1.21509	0.117031	10.3827	2.97e-25	5.75e-24
SFRP4	225.092	2.97987	0.287222	10.3748	3.23e-25	6.24e-24
ALPI	76.3953	6.37132	0.61418	10.3737	3.27e-25	6.3e-24
SYNE1	1168.76	-1.30451	0.125761	-10.373	3.29e-25	6.34e-24
KRT20	40.7563	6.53773	0.630468	10.3696	3.41e-25	6.55e-24
UGT2B11	1261.29	3.12406	0.301343	10.3671	3.5e-25	6.72e-24
SLC50A1	3587.47	1.24122	0.119745	10.3655	3.56e-25	6.83e-24
NAT1	242.723	-1.29578	0.125037	-10.3632	3.65e-25	6.98e-24
SOCS3	2339.18	-2.30849	0.222767	-10.3628	3.66e-25	7e-24
DNAJC25	1033.69	-1.24683	0.120421	-10.3539	4.02e-25	7.68e-24
CHML	584.235	1.72203	0.166322	10.3536	4.03e-25	7.7e-24
MSI1	322.052	3.49916	0.338	10.3525	4.07e-25	7.77e-24
SMYD3	305.735	1.5156	0.146404	10.3522	4.09e-25	7.79e-24
MKRN3	27.7714	3.97442	0.383988	10.3504	4.17e-25	7.93e-24
HOXD4	7.03594	4.68683	0.452923	10.348	4.28e-25	8.13e-24
TRIM54	61.9344	4.13445	0.399567	10.3473	4.3e-25	8.17e-24
TMEM262	32.4687	1.16406	0.1125	10.3472	4.31e-25	8.17e-24
MBNL2	2699.61	-1.37529	0.132916	-10.3471	4.31e-25	8.17e-24
RIPOR3	150.517	-2.41885	0.233917	-10.3406	4.62e-25	8.73e-24
BCL9	878.637	1.34387	0.12998	10.339	4.69e-25	8.86e-24
MUT	5893.11	-1.33367	0.128998	-10.3386	4.71e-25	8.89e-24
SH3PXD2B	597.432	1.31593	0.127369	10.3316	5.07e-25	9.56e-24
RIPK4	1175.21	-1.37979	0.133555	-10.3313	5.09e-25	9.58e-24
RMI2	295.989	1.93888	0.187753	10.3268	5.33e-25	1e-23
IL17D	107.853	3.1786	0.308036	10.3189	5.79e-25	1.09e-23
ARL16	927.234	1.18825	0.115163	10.318	5.85e-25	1.09e-23
ANKS3	498.22	1.08121	0.104836	10.3133	6.13e-25	1.15e-23
SLC26A2	401.483	1.22054	0.118366	10.3115	6.25e-25	1.17e-23
CD163	1659.11	-1.97551	0.191662	-10.3072	6.53e-25	1.22e-23
LRRC55	24.503	-2.75292	0.267222	-10.302	6.9e-25	1.29e-23
CCL14	174.961	-1.86243	0.180832	-10.2993	7.1e-25	1.32e-23
IL6ST	10149.1	-1.00614	0.0977075	-10.2975	7.23e-25	1.34e-23
AQP8	166.243	4.10295	0.398525	10.2953	7.4e-25	1.37e-23
H2AFX	1191.05	1.45278	0.141305	10.2811	8.57e-25	1.59e-23
DCST2	72.8979	1.88735	0.183602	10.2795	8.71e-25	1.61e-23
RTBDN	27.3587	5.50007	0.535221	10.2763	9.02e-25	1.66e-23
TEX22	19.7032	2.19733	0.213905	10.2724	9.38e-25	1.73e-23
BOP1	3733.85	1.69207	0.164747	10.2707	9.55e-25	1.76e-23
FPR2	16.6517	-2.84223	0.276819	-10.2674	9.88e-25	1.82e-23
RHBDL3	71.3558	3.82483	0.372667	10.2634	1.03e-24	1.89e-23
TSC22D2	1195.82	-1.00138	0.0975969	-10.2603	1.06e-24	1.95e-23
HOXC9	33.2108	5.93374	0.578457	10.2579	1.09e-24	2e-23
BANF2	10.2981	4.99549	0.487069	10.2562	1.11e-24	2.03e-23
CTBS	1219.56	-1.06068	0.103451	-10.2529	1.15e-24	2.1e-23
ZGRF1	93.6275	1.341	0.130872	10.2467	1.22e-24	2.24e-23
PNMA3	259.558	3.69498	0.360868	10.2391	1.32e-24	2.41e-23
ACAT1	15477.2	-1.39381	0.13613	-10.2389	1.33e-24	2.42e-23
CENPP	124.251	1.09428	0.106903	10.2362	1.36e-24	2.48e-23
AC025594.2	26.0561	2.16921	0.211969	10.2336	1.4e-24	2.55e-23
PPP2R3B	415.289	1.05174	0.102812	10.2297	1.46e-24	2.65e-23
P2RY13	106.952	-1.93464	0.189149	-10.2281	1.48e-24	2.69e-23
ALKBH6	124.654	1.22328	0.119615	10.2269	1.5e-24	2.72e-23
VASH2	102.216	2.3818	0.233019	10.2215	1.59e-24	2.87e-23
CEP152	112.978	1.37053	0.134125	10.2183	1.64e-24	2.97e-23
CCDC163	97.5388	1.42587	0.139582	10.2153	1.69e-24	3.05e-23
NEU1	5442.53	1.16111	0.11367	10.2148	1.7e-24	3.07e-23
ACAA2	16317.3	-1.58429	0.155305	-10.2011	1.96e-24	3.52e-23
CEP72	245.3	1.36797	0.134125	10.1992	2e-24	3.58e-23
JUNB	5402.15	-1.53924	0.150974	-10.1954	2.08e-24	3.72e-23
FER1L6	63.9925	5.52497	0.542198	10.19	2.2e-24	3.93e-23
CYP19A1	30.9103	4.98203	0.488975	10.1887	2.23e-24	3.97e-23
DIO2	120.003	4.04629	0.397343	10.1834	2.35e-24	4.19e-23
DHODH	3083.69	-1.75459	0.172348	-10.1805	2.42e-24	4.31e-23
SAC3D1	716.509	1.30136	0.127863	10.1778	2.49e-24	4.43e-23
ANTXR2	1490.32	-1.26302	0.124162	-10.1723	2.63e-24	4.68e-23
SOWAHC	1952.81	-1.17079	0.115102	-10.1717	2.65e-24	4.7e-23
ADRA1A	506.407	-3.10564	0.305364	-10.1703	2.69e-24	4.77e-23
ZNF341	248.348	1.08484	0.10668	10.1691	2.72e-24	4.82e-23
USP38	1228.86	-1.00361	0.0986987	-10.1684	2.74e-24	4.85e-23
NKD1	1491.37	3.87904	0.381511	10.1676	2.77e-24	4.89e-23
CPA6	19.5633	5.14466	0.506087	10.1656	2.82e-24	4.98e-23
ARL5B	2224.69	-1.04552	0.102904	-10.1601	2.99e-24	5.26e-23
KIAA1614	86.4642	1.84095	0.181271	10.1558	3.12e-24	5.49e-23
NAA11	31.0181	8.86724	0.873359	10.153	3.21e-24	5.64e-23
SPRYD4	3017.23	-1.30951	0.128994	-10.1517	3.26e-24	5.72e-23
WNT3A	26.2907	6.02438	0.593536	10.15	3.31e-24	5.81e-23
HOXA3	124.402	2.8472	0.280747	10.1415	3.62e-24	6.33e-23
SEPT5	343.259	1.99577	0.196967	10.1325	3.96e-24	6.94e-23
SPARCL1	6648.48	2.75134	0.271556	10.1317	4e-24	6.99e-23
LRRN3	20.4146	-2.5891	0.255568	-10.1308	4.03e-24	7.04e-23
CMTM6	4039.23	-1.02648	0.101356	-10.1275	4.17e-24	7.27e-23
MCM8	351.26	1.34432	0.132751	10.1266	4.21e-24	7.33e-23
SLC52A2	1304.65	1.43275	0.141502	10.1252	4.27e-24	7.43e-23
PTPN3	2192.44	-1.01666	0.100446	-10.1215	4.44e-24	7.71e-23
EML6	114.202	2.00282	0.197969	10.1168	4.65e-24	8.07e-23
LMNB2	1157.96	1.31478	0.129987	10.1147	4.76e-24	8.24e-23
POU5F1	85.2581	1.99736	0.197479	10.1142	4.78e-24	8.27e-23
TRAF5	299.56	1.49169	0.147568	10.1084	5.07e-24	8.75e-23
RNF125	606.072	-1.87839	0.185835	-10.1078	5.1e-24	8.8e-23
FAM72A	23.0363	1.86977	0.185007	10.1065	5.17e-24	8.91e-23
KLF10	2695	-1.4437	0.142882	-10.1041	5.3e-24	9.11e-23
CCDC137	982.629	1.01491	0.100468	10.1018	5.43e-24	9.32e-23
CEL	43.9327	2.92416	0.289596	10.0974	5.67e-24	9.74e-23
ZCCHC24	1895.37	-1.09681	0.108641	-10.0957	5.77e-24	9.89e-23
MAPK12	473.001	2.20582	0.218489	10.0958	5.77e-24	9.89e-23
PRRG3	13.54	2.42462	0.240174	10.0953	5.8e-24	9.92e-23
ANO2	49.8021	3.07465	0.304892	10.0844	6.48e-24	1.11e-22
FAM72B	19.3677	2.26551	0.224784	10.0786	6.87e-24	1.17e-22
MLYCD	1420.06	-1.26659	0.125797	-10.0685	7.61e-24	1.3e-22
DNM3	73.0828	1.55535	0.154484	10.068	7.65e-24	1.3e-22
CAT	19072.3	-1.42115	0.141204	-10.0645	7.93e-24	1.35e-22
CBFA2T3	188.674	-1.94074	0.192856	-10.0632	8.04e-24	1.37e-22
ZSCAN16	162.562	1.11245	0.110597	10.0586	8.42e-24	1.43e-22
CREG2	11.0963	3.25731	0.323877	10.0572	8.54e-24	1.45e-22
PLPBP	2235.79	-1.0805	0.107498	-10.0513	9.06e-24	1.53e-22
CYB561D1	233.625	1.20503	0.119902	10.0501	9.17e-24	1.55e-22
PCNA	2893.55	1.06258	0.105799	10.0433	9.83e-24	1.66e-22
SLC9A3	103.75	3.53461	0.351993	10.0417	9.99e-24	1.68e-22
UNC13A	43.6144	3.61529	0.360666	10.0239	1.2e-23	2.02e-22
KDM6B	1169.07	-1.03008	0.102784	-10.0218	1.22e-23	2.06e-22
DIRAS3	101.391	-2.83814	0.283571	-10.0086	1.4e-23	2.35e-22
GPR35	235.231	3.02675	0.302519	10.0051	1.45e-23	2.43e-22
MSX1	92.0159	1.87009	0.187057	9.99739	1.56e-23	2.62e-22
IDUA	752.269	1.24502	0.124539	9.99704	1.57e-23	2.63e-22
TIGD3	40.733	2.16815	0.216926	9.99488	1.6e-23	2.68e-22
DCST1	19.9363	2.23137	0.22341	9.9878	1.72e-23	2.87e-22
PAFAH1B3	801.242	1.99424	0.199683	9.98703	1.74e-23	2.89e-22
L3MBTL1	110.089	1.40116	0.140352	9.98316	1.81e-23	3.01e-22
PSMD4	11700.1	1.09348	0.109602	9.97685	1.92e-23	3.2e-22
INCENP	384.159	1.2557	0.125913	9.97279	2.01e-23	3.33e-22
APOF	5496.15	-2.85478	0.2863	-9.97129	2.04e-23	3.37e-22
KLF11	1523.83	-1.23893	0.124428	-9.95704	2.35e-23	3.88e-22
NEB	880.194	2.87282	0.288527	9.95685	2.35e-23	3.89e-22
FGD1	324.998	1.38386	0.138992	9.95638	2.37e-23	3.9e-22
HIVEP1	807.071	-1.15967	0.116479	-9.956	2.37e-23	3.91e-22
ATF3	2230.58	-1.73209	0.174003	-9.95437	2.41e-23	3.97e-22
SBF1	2152.97	1.02821	0.103295	9.9541	2.42e-23	3.98e-22
SLC31A1	5366.15	-1.04579	0.105069	-9.95336	2.44e-23	4.01e-22
DLK2	73.3535	1.97586	0.198899	9.93398	2.96e-23	4.86e-22
FAM212A	67.289	1.47936	0.148945	9.93225	3.01e-23	4.93e-22
KCNE5	40.5952	3.19649	0.321877	9.93079	3.06e-23	5e-22
SDC4	20706.1	-1.27033	0.12807	-9.91902	3.44e-23	5.6e-22
GPSM1	591.117	2.03341	0.205023	9.91799	3.48e-23	5.65e-22
ANKRD13B	103.821	1.72172	0.1737	9.91205	3.69e-23	5.99e-22
PPP2R2C	159.955	4.72134	0.476393	9.9106	3.74e-23	6.08e-22
TMEM81	151.842	1.04684	0.105665	9.90715	3.88e-23	6.28e-22
IBSP	13.6865	5.41309	0.546552	9.90407	4e-23	6.48e-22
MSRA	1498.8	-1.37622	0.139001	-9.90081	4.13e-23	6.68e-22
PDE4C	75.6434	1.91837	0.193771	9.9002	4.15e-23	6.72e-22
MPZ	670.917	2.99514	0.302679	9.89543	4.36e-23	7.03e-22
ZNF296	59.9513	2.21458	0.223835	9.8938	4.43e-23	7.14e-22
ATAT1	301.59	1.08619	0.10979	9.89333	4.45e-23	7.17e-22
EEF1A2	3951.29	3.96418	0.400718	9.8927	4.48e-23	7.21e-22
CSAG1	190.742	5.69784	0.576264	9.88754	4.71e-23	7.58e-22
IGFALS	2427.9	-3.16434	0.320893	-9.86103	6.14e-23	9.84e-22
ACTL8	38.2062	6.50168	0.659362	9.86057	6.17e-23	9.88e-22
BGLAP	30.4808	1.83495	0.186091	9.86052	6.17e-23	9.88e-22
C20ORF96	222.373	1.02415	0.104021	9.84567	7.16e-23	1.14e-21
MCAM	2359.07	1.36231	0.138378	9.84481	7.22e-23	1.15e-21
SLC7A10	45.1848	4.9557	0.503546	9.84161	7.45e-23	1.19e-21
DNASE1L2	38.5428	2.56093	0.260213	9.84165	7.45e-23	1.19e-21
LINGO1	333.498	2.5602	0.260326	9.83459	7.99e-23	1.27e-21
SLC22A31	661.038	5.08651	0.51733	9.83224	8.18e-23	1.3e-21
ARFGEF3	355.664	2.92086	0.297093	9.83145	8.24e-23	1.31e-21
C1QTNF3	494.752	2.82373	0.287217	9.83134	8.25e-23	1.31e-21
ACSM3	1577.83	-2.04971	0.208654	-9.8235	8.92e-23	1.41e-21
MASP1	6105.41	-1.60983	0.163919	-9.8209	9.15e-23	1.45e-21
AKR1B10	25702.3	3.64092	0.370849	9.81778	9.44e-23	1.49e-21
PKN3	460.183	1.42956	0.145698	9.81183	1e-22	1.58e-21
DUOX1	155.164	2.23888	0.228212	9.81054	1.01e-22	1.6e-21
DNA2	164.748	1.36821	0.139583	9.8021	1.1e-22	1.73e-21
ALDH6A1	11952.8	-1.74614	0.178212	-9.79811	1.15e-22	1.8e-21
QRICH2	218.626	1.47407	0.150576	9.78955	1.25e-22	1.96e-21
GRAMD1A	1997.88	1.45187	0.148339	9.78751	1.27e-22	2e-21
CPXM1	137.518	2.39807	0.245197	9.78018	1.37e-22	2.15e-21
NR4A1	1586.21	-2.1384	0.218802	-9.7732	1.47e-22	2.29e-21
ACSL1	30790.6	-1.83617	0.18789	-9.77258	1.48e-22	2.31e-21
CACNB4	38.0827	2.9395	0.300841	9.77097	1.5e-22	2.34e-21
PRIM1	365.203	1.28678	0.131728	9.76847	1.54e-22	2.4e-21
HOXD1	8.23035	4.91602	0.503389	9.76584	1.58e-22	2.46e-21
DLX5	12.3911	4.80809	0.492485	9.76293	1.62e-22	2.53e-21
ZNF99	27.3813	4.37606	0.44824	9.76277	1.63e-22	2.53e-21
CRYGS	76.1041	1.31147	0.134388	9.7588	1.69e-22	2.63e-21
GNAL	257.764	2.04149	0.209247	9.75635	1.73e-22	2.69e-21
ANKFN1	71.7615	6.94204	0.711553	9.75617	1.74e-22	2.69e-21
RHPN1	324.39	1.88187	0.1929	9.75565	1.74e-22	2.7e-21
SPIRE2	786.225	1.29695	0.133018	9.75022	1.84e-22	2.84e-21
MAT1A	49700.8	-1.80888	0.185577	-9.74733	1.89e-22	2.92e-21
HMGCLL1	8.49502	-2.82691	0.290081	-9.74524	1.93e-22	2.98e-21
PRRX1	127.419	2.29634	0.235839	9.7369	2.1e-22	3.22e-21
P2RY12	16.4612	-2.43136	0.249754	-9.73503	2.14e-22	3.28e-21
NSUN6	1153	-1.12948	0.116039	-9.73357	2.17e-22	3.33e-21
PLA2G6	657.196	1.33237	0.13697	9.7274	2.3e-22	3.53e-21
DLC1	1666.75	-1.26061	0.129629	-9.72471	2.37e-22	3.62e-21
IRF8	864.988	-1.56509	0.160966	-9.7231	2.4e-22	3.67e-21
PBLD	5332.28	-1.75972	0.181052	-9.71946	2.49e-22	3.8e-21
INMT	620.97	-2.43872	0.251077	-9.71303	2.65e-22	4.05e-21
DSTYK	507.713	1.02769	0.105836	9.71024	2.73e-22	4.15e-21
ZNF581	587.965	1.23925	0.127659	9.7075	2.8e-22	4.25e-21
TMEM150B	469.392	2.24553	0.231354	9.70607	2.84e-22	4.31e-21
STK39	493.995	1.99786	0.205946	9.70089	2.99e-22	4.53e-21
TJP2	3019.5	-1.03913	0.107141	-9.69873	3.05e-22	4.62e-21
SIRT7	919.75	1.00425	0.103575	9.69585	3.14e-22	4.74e-21
POPDC3	39.1123	6.20317	0.639933	9.69347	3.21e-22	4.85e-21
VAX2	19.7452	3.32566	0.343278	9.68793	3.39e-22	5.12e-21
UCHL1	240.314	3.41273	0.352495	9.68164	3.61e-22	5.44e-21
NCAPG2	530.264	1.23428	0.127503	9.68038	3.65e-22	5.5e-21
C6ORF48	2702.13	1.21169	0.125184	9.67925	3.69e-22	5.56e-21
PLIN2	18367	-1.67214	0.172775	-9.67814	3.73e-22	5.61e-21
CYP2C8	21695.9	-2.67299	0.276244	-9.67619	3.81e-22	5.71e-21
BRSK2	45.8991	3.44877	0.356624	9.6706	4.02e-22	6.02e-21
ISL2	18.263	4.00548	0.414232	9.66967	4.06e-22	6.07e-21
SLC9B2	1300.45	-1.43579	0.14854	-9.66598	4.21e-22	6.29e-21
TMEM164	681.625	1.3584	0.140574	9.66323	4.32e-22	6.46e-21
EGR3	78.5949	-2.12421	0.219828	-9.66305	4.33e-22	6.46e-21
SCIMP	130.109	-1.66042	0.17192	-9.65811	4.54e-22	6.77e-21
PROK2	3.71876	-2.92723	0.303227	-9.6536	4.75e-22	7.06e-21
TRIM16L	1123.08	2.43558	0.252333	9.65223	4.81e-22	7.15e-21
KCNN3	148.076	1.50112	0.155563	9.64962	4.93e-22	7.33e-21
YJEFN3	83.6159	1.78435	0.184997	9.64527	5.15e-22	7.63e-21
MMP12	68.7191	3.97989	0.412642	9.64489	5.17e-22	7.65e-21
MEX3A	280.224	1.87754	0.194788	9.63888	5.48e-22	8.1e-21
PCBP4	1122.07	1.1094	0.115124	9.63652	5.61e-22	8.28e-21
CDH8	9.81096	3.82893	0.3975	9.63253	5.83e-22	8.59e-21
DCAF8L1	13.6098	8.25552	0.857053	9.63245	5.83e-22	8.59e-21
DNMT1	1665.8	1.16826	0.121365	9.62599	6.21e-22	9.14e-21
KLRF1	18.8976	-1.79594	0.186575	-9.62585	6.22e-22	9.15e-21
CYP4V2	4823.74	-1.4288	0.148522	-9.62012	6.58e-22	9.66e-21
PDLIM7	924.333	1.25968	0.131106	9.60814	7.39e-22	1.08e-20
NXF3	13.8389	-2.92587	0.30455	-9.60719	7.46e-22	1.09e-20
CLEC2L	31.2164	6.09504	0.634422	9.60724	7.45e-22	1.09e-20
GAREM2	110.755	2.17981	0.227095	9.59866	8.1e-22	1.18e-20
ADK	2460.51	-1.10566	0.115205	-9.59739	8.2e-22	1.2e-20
CASTOR2	41.662	1.55824	0.162404	9.59489	8.4e-22	1.23e-20
CBR4	1506.18	-1.18313	0.12339	-9.58854	8.93e-22	1.3e-20
CCNO	74.4496	3.24574	0.338535	9.5876	9.02e-22	1.31e-20
MNS1	243.465	2.69903	0.281684	9.58177	9.54e-22	1.38e-20
HIST1H2AI	9.84483	3.67727	0.383826	9.58056	9.65e-22	1.4e-20
CAMK4	69.0677	-1.72211	0.179757	-9.58023	9.68e-22	1.4e-20
EPHX4	13.051	2.662	0.277963	9.57681	1e-21	1.45e-20
RGMA	46.1615	1.94633	0.203304	9.57351	1.03e-21	1.5e-20
HOXD3	4.79174	3.64398	0.380741	9.57077	1.06e-21	1.53e-20
RMDN2	497.011	-1.14948	0.120127	-9.56883	1.08e-21	1.56e-20
HOXD10	18.005	4.4717	0.467397	9.56725	1.1e-21	1.58e-20
EPHB1	50.5367	-2.04	0.213317	-9.5632	1.14e-21	1.64e-20
SRRM3	122.819	3.07226	0.32128	9.56255	1.15e-21	1.65e-20
EPM2A	253.69	-1.01766	0.106447	-9.56026	1.17e-21	1.69e-20
GALNT10	873.412	1.03374	0.108154	9.55805	1.2e-21	1.72e-20
NRM	587.003	1.48515	0.155431	9.55507	1.24e-21	1.77e-20
TLR4	395.347	-1.4802	0.154993	-9.55012	1.3e-21	1.85e-20
ELMSAN1	821.269	-1.02185	0.107004	-9.5496	1.3e-21	1.86e-20
SIPA1L3	1156.54	1.17947	0.123549	9.54655	1.34e-21	1.91e-20
ANKRD55	37.1989	-2.22058	0.232604	-9.54658	1.34e-21	1.91e-20
CEACAM20	75.2903	4.47092	0.468337	9.54639	1.34e-21	1.92e-20
F2RL3	182.307	2.31433	0.242444	9.54584	1.35e-21	1.92e-20
VSIG1	87.7522	3.77861	0.395939	9.54341	1.38e-21	1.97e-20
RHOB	27770.2	-1.46978	0.154092	-9.53834	1.45e-21	2.06e-20
EPB41L4B	2766.1	-1.57291	0.164932	-9.53673	1.47e-21	2.09e-20
FAM13A	1088	-1.90509	0.199778	-9.53603	1.48e-21	2.1e-20
NPY1R	175.853	-2.41419	0.253208	-9.5344	1.51e-21	2.14e-20
SYN3	30.7341	2.66487	0.279503	9.53432	1.51e-21	2.14e-20
ZNF572	85.7606	1.40539	0.147421	9.5332	1.53e-21	2.16e-20
ETFRF1	1266.67	-1.02643	0.107704	-9.53013	1.57e-21	2.22e-20
DAPK2	540.613	1.61514	0.169532	9.52709	1.62e-21	2.28e-20
KLF6	6613.53	-1.33676	0.140318	-9.52665	1.62e-21	2.29e-20
MYBPC1	15.3733	2.9345	0.308125	9.52375	1.67e-21	2.35e-20
PPT2-EGFL8	33.8867	1.06784	0.112178	9.51917	1.75e-21	2.45e-20
GNA14	116.89	-1.75237	0.18413	-9.51705	1.78e-21	2.5e-20
CLCN2	311.48	1.03678	0.108948	9.51628	1.79e-21	2.52e-20
TPBGL	43.8264	2.82502	0.297059	9.50997	1.91e-21	2.67e-20
CLN3	1612.85	1.11759	0.117565	9.50614	1.98e-21	2.77e-20
IGDCC3	23.2801	4.87606	0.513016	9.50469	2.01e-21	2.8e-20
C1ORF64	58.6159	5.24309	0.551826	9.50135	2.07e-21	2.89e-20
HMGCL	8181.56	-1.27478	0.134223	-9.4975	2.15e-21	3e-20
CCDC78	37.3887	2.34346	0.246796	9.49553	2.19e-21	3.05e-20
BCAS4	193.744	1.7103	0.18016	9.49322	2.24e-21	3.12e-20
EFNB3	39.9834	-2.13012	0.224598	-9.48417	2.44e-21	3.39e-20
UNC119B	625.57	1.18002	0.124519	9.4766	2.63e-21	3.64e-20
HIST1H3B	14.2597	3.27186	0.345465	9.47088	2.77e-21	3.84e-20
CXCR2	19.7633	-2.36359	0.249755	-9.46363	2.97e-21	4.11e-20
LHX2	53.953	-2.15459	0.227684	-9.46306	2.99e-21	4.13e-20
RFPL1	1.31848	-4.00522	0.423407	-9.45949	3.09e-21	4.27e-20
CKAP2	490.517	1.22423	0.12954	9.4506	3.37e-21	4.65e-20
RBL1	242.402	1.26595	0.134065	9.44282	3.63e-21	5e-20
AQP3	3137.46	-1.55386	0.16457	-9.44198	3.66e-21	5.04e-20
C19ORF48	2363.46	1.35048	0.143032	9.44183	3.66e-21	5.04e-20
GTF2IRD1	588.772	1.10809	0.11737	9.441	3.69e-21	5.08e-20
PPP1R3B	4620.29	-1.66132	0.176062	-9.43596	3.87e-21	5.32e-20
SOWAHA	559.757	1.86767	0.197944	9.43537	3.9e-21	5.34e-20
FAM46A	1384.51	-1.40227	0.148691	-9.43075	4.07e-21	5.57e-20
EGF	54.3944	4.76529	0.505294	9.43073	4.07e-21	5.57e-20
RBMS3	196.019	-1.52498	0.161733	-9.42899	4.14e-21	5.65e-20
S100A3	20.5822	2.65946	0.282209	9.42374	4.35e-21	5.93e-20
PHEX	39.5416	3.20198	0.340078	9.41544	4.71e-21	6.41e-20
JDP2	531.297	-1.18744	0.126163	-9.41197	4.87e-21	6.61e-20
DDX53	26.0423	6.74607	0.717017	9.40852	5.03e-21	6.82e-20
ATP6V1C1	3264.76	1.01764	0.108185	9.40648	5.13e-21	6.95e-20
SERPINE1	9087.75	-2.22074	0.236147	-9.40405	5.25e-21	7.1e-20
EDNRB	1129.86	-1.44902	0.154106	-9.40274	5.32e-21	7.19e-20
DUSP1	12448.2	-1.66627	0.177229	-9.4018	5.36e-21	7.24e-20
RFXANK	1367.66	1.11022	0.118094	9.4012	5.39e-21	7.28e-20
PTGS2	69.9348	-2.42826	0.258435	-9.39602	5.67e-21	7.63e-20
GTSF1	248.703	4.2391	0.451226	9.39462	5.74e-21	7.73e-20
TMEM266	64.204	2.06506	0.21982	9.39432	5.76e-21	7.74e-20
RAB6B	174.691	1.48454	0.158028	9.39418	5.77e-21	7.74e-20
GLA	1008.75	1.18506	0.12616	9.3933	5.82e-21	7.8e-20
PPP1R35	766.736	1.10278	0.117456	9.38891	6.06e-21	8.13e-20
RFLNA	45.337	3.21331	0.342292	9.38761	6.14e-21	8.21e-20
SFI1	658.804	1.29443	0.137896	9.38704	6.17e-21	8.25e-20
AC009014.1	175.912	4.39976	0.468961	9.38194	6.48e-21	8.64e-20
SLC6A9	226.448	2.09395	0.223208	9.38116	6.53e-21	8.7e-20
DOCK3	20.4583	2.20806	0.23541	9.37963	6.62e-21	8.82e-20
PLXNC1	720.627	1.82902	0.195056	9.37691	6.79e-21	9.03e-20
FAM212B	218.289	1.21852	0.129966	9.37563	6.88e-21	9.14e-20
HES6	351.144	1.40541	0.149939	9.37324	7.03e-21	9.34e-20
STRA6	33.8233	3.60925	0.385084	9.37263	7.07e-21	9.39e-20
BDH2	1230.05	-1.30123	0.138842	-9.37207	7.11e-21	9.43e-20
GRPR	42.1305	3.93261	0.419631	9.37159	7.14e-21	9.47e-20
PIAS3	503.467	1.01184	0.107976	9.37098	7.19e-21	9.51e-20
BHLHE40	7508.06	-1.3912	0.148481	-9.36952	7.29e-21	9.64e-20
AGO2	1235.36	1.02385	0.109329	9.36481	7.62e-21	1.01e-19
CPED1	777.427	-2.00996	0.214646	-9.36409	7.67e-21	1.01e-19
C1QL4	16.6075	4.08694	0.436486	9.36329	7.73e-21	1.02e-19
DLG5	686.99	1.61323	0.172478	9.35321	8.5e-21	1.12e-19
DIRAS1	66.3832	3.54984	0.379692	9.34926	8.83e-21	1.16e-19
PROS1	9317.95	-1.22091	0.130625	-9.34669	9.04e-21	1.19e-19
FAM171A2	59.8702	2.10679	0.225596	9.33874	9.75e-21	1.28e-19
PSRC1	222.405	1.56351	0.167486	9.33517	1.01e-20	1.32e-19
ARIH2OS	54.623	1.05426	0.112974	9.33184	1.04e-20	1.36e-19
ZNF883	46.5172	2.82995	0.303394	9.32766	1.08e-20	1.42e-19
CKS2	767.499	1.35965	0.145781	9.32664	1.09e-20	1.43e-19
HOXC6	23.1678	4.82682	0.517546	9.32637	1.1e-20	1.43e-19
MPP3	99.7265	1.88771	0.202524	9.3209	1.15e-20	1.5e-19
AKR1B15	271.177	3.88705	0.417088	9.31949	1.17e-20	1.52e-19
HIST1H2AM	9.50683	2.5281	0.27133	9.31744	1.19e-20	1.55e-19
STEAP3	6226.7	-1.70246	0.182728	-9.31691	1.2e-20	1.56e-19
CPT2	3141.72	-1.18847	0.127691	-9.30733	1.31e-20	1.7e-19
TMEM220	2136.75	-1.48983	0.16008	-9.30677	1.32e-20	1.71e-19
SLC4A11	86.0658	2.80219	0.301134	9.30546	1.33e-20	1.73e-19
BFSP1	52.9087	1.46434	0.157363	9.30551	1.33e-20	1.73e-19
PROCA1	64.0717	1.49236	0.160373	9.30558	1.33e-20	1.73e-19
CCDC170	371.678	2.49143	0.267938	9.29852	1.42e-20	1.84e-19
C1ORF198	2335.81	1.15493	0.124223	9.29723	1.44e-20	1.86e-19
ABCB5	22.9439	5.17852	0.557235	9.29325	1.5e-20	1.93e-19
TMEM27	343.791	-2.46616	0.265445	-9.29067	1.53e-20	1.97e-19
WDYHV1	417.325	1.14975	0.123767	9.28961	1.55e-20	1.99e-19
MMRN1	174.908	-1.94705	0.209627	-9.28816	1.57e-20	2.02e-19
C11ORF84	370.932	1.21536	0.130865	9.28713	1.59e-20	2.04e-19
PAGE1	57.5637	7.45003	0.80263	9.28203	1.66e-20	2.13e-19
GINS4	123.782	1.73018	0.186505	9.27683	1.75e-20	2.24e-19
MYH4	1966.88	6.05494	0.652773	9.27571	1.76e-20	2.26e-19
TIGD7	68.798	1.15846	0.124939	9.27225	1.82e-20	2.33e-19
CYP4A11	20713.1	-2.23136	0.240762	-9.2679	1.9e-20	2.42e-19
ANXA2R	101.091	1.53643	0.165811	9.26617	1.93e-20	2.46e-19
PPP1R1B	41.092	3.98912	0.430604	9.26402	1.97e-20	2.51e-19
PLPPR4	24.5025	2.81116	0.303472	9.26332	1.98e-20	2.52e-19
BEST4	18.4909	2.32076	0.250671	9.25817	2.08e-20	2.64e-19
SCG2	15.026	3.60958	0.389986	9.25567	2.13e-20	2.7e-19
C6ORF223	215.747	4.18371	0.452066	9.25464	2.15e-20	2.73e-19
SLC36A1	379.815	1.02542	0.110813	9.25362	2.17e-20	2.75e-19
TDRKH	494.77	1.22208	0.132074	9.25303	2.18e-20	2.76e-19
ZNF300	109.586	2.04954	0.221565	9.25028	2.24e-20	2.83e-19
TNFRSF25	278.162	1.54051	0.166547	9.24973	2.25e-20	2.85e-19
SEC24B	1815.1	-1.06327	0.114979	-9.24751	2.3e-20	2.9e-19
REXO5	222.996	1.37254	0.148439	9.24647	2.32e-20	2.93e-19
FLNC	966.924	3.27086	0.35386	9.24339	2.39e-20	3.01e-19
MYO1B	11695.2	-1.15427	0.124883	-9.24279	2.4e-20	3.03e-19
NAT2	586.253	-2.93518	0.317605	-9.24159	2.43e-20	3.06e-19
NR4A3	228.693	-2.19991	0.238103	-9.23933	2.48e-20	3.12e-19
CD160	29.8557	-1.65765	0.179658	-9.22673	2.79e-20	3.51e-19
TRIM17	26.6196	3.2981	0.357534	9.22456	2.85e-20	3.57e-19
ALB	3.1109e+06	-1.82337	0.197813	-9.21768	3.04e-20	3.81e-19
ADAMTS16	141.339	3.55174	0.385438	9.2148	3.12e-20	3.91e-19
ECHS1	28426.3	-1.19816	0.130104	-9.20927	3.28e-20	4.11e-19
WEE1	1620.32	-1.17707	0.127872	-9.20509	3.41e-20	4.26e-19
ALPK3	767.041	2.06468	0.224366	9.20228	3.5e-20	4.37e-19
PRR36	91.3021	2.35885	0.256338	9.20211	3.51e-20	4.38e-19
ACAD11	107.643	-1.71375	0.186301	-9.19879	3.62e-20	4.51e-19
ALDH8A1	4947.98	-1.90254	0.206866	-9.19696	3.68e-20	4.58e-19
CFL2	3469.87	-1.05981	0.115246	-9.19603	3.71e-20	4.62e-19
TRAM1L1	39.4717	2.99216	0.325437	9.19429	3.77e-20	4.69e-19
RHBDL1	105.811	1.65004	0.179492	9.19286	3.83e-20	4.75e-19
CACNA1E	23.4613	3.93229	0.427903	9.18967	3.94e-20	4.89e-19
MTMR11	553.077	1.90692	0.207628	9.18429	4.14e-20	5.13e-19
PFDN6	2617.22	1.05777	0.115202	9.18193	4.23e-20	5.24e-19
NOCT	330.939	-1.78423	0.194532	-9.17191	4.65e-20	5.72e-19
STMND1	45.0464	3.22334	0.351783	9.16286	5.05e-20	6.22e-19
FITM1	127.891	-2.04872	0.223656	-9.16015	5.18e-20	6.37e-19
ZNF695	12.7848	4.5724	0.499234	9.15883	5.25e-20	6.44e-19
ZHX1-C8ORF76	53.8573	1.48165	0.161813	9.15657	5.36e-20	6.58e-19
GLP1R	17.1333	5.79526	0.63308	9.15407	5.48e-20	6.72e-19
TSACC	58.804	1.58067	0.172752	9.14996	5.7e-20	6.97e-19
ACP4	15.1966	3.6926	0.403737	9.14606	5.9e-20	7.21e-19
PAGE2B	27.5913	6.10801	0.667886	9.14529	5.95e-20	7.26e-19
HIST1H3D	30.4711	2.26577	0.247772	9.1446	5.99e-20	7.3e-19
LPA	1769.59	-2.31771	0.253456	-9.14443	5.99e-20	7.31e-19
DLK1	2379.87	6.17595	0.675603	9.14139	6.17e-20	7.51e-19
CYP2B6	8707.76	-2.63716	0.28864	-9.13652	6.45e-20	7.85e-19
C11ORF54	4610.67	-1.16263	0.12735	-9.12944	6.89e-20	8.37e-19
DACH2	7.85442	4.78191	0.523894	9.12762	7e-20	8.51e-19
PGLYRP1	2.59849	-2.09847	0.229955	-9.12557	7.14e-20	8.66e-19
SERPINI1	273.384	1.75091	0.19194	9.12217	7.36e-20	8.93e-19
PITPNM3	81.2529	-2.53347	0.277851	-9.11811	7.64e-20	9.26e-19
PLEKHH1	182.839	1.38026	0.151482	9.11172	8.11e-20	9.81e-19
OSBP2	193.924	1.7359	0.190756	9.1001	9.03e-20	1.09e-18
SEMA6C	849.092	1.49335	0.164215	9.09391	9.55e-20	1.15e-18
YPEL2	1248.08	-1.0608	0.11675	-9.0861	1.03e-19	1.24e-18
LRRC69	34.2411	1.98713	0.218734	9.08469	1.04e-19	1.25e-18
MYBPHL	12.8015	4.65804	0.512772	9.08405	1.05e-19	1.26e-18
SCGB3A1	24.6623	-2.17104	0.239009	-9.08353	1.05e-19	1.26e-18
SOX12	1202.32	1.39966	0.154098	9.08288	1.06e-19	1.27e-18
KCNC1	6.6399	4.07723	0.448896	9.08278	1.06e-19	1.27e-18
GCNT3	320.53	3.01689	0.332345	9.0776	1.11e-19	1.33e-18
MCF2L2	42.4022	2.78458	0.30676	9.0774	1.11e-19	1.33e-18
RXFP1	22.114	-1.78939	0.197153	-9.07618	1.12e-19	1.35e-18
P3H4	608.913	1.56509	0.172478	9.07419	1.15e-19	1.37e-18
DCAF13	1629.96	1.05274	0.116026	9.07327	1.15e-19	1.38e-18
FABP5	285.527	1.69484	0.186873	9.06944	1.2e-19	1.43e-18
PRAM1	62.017	-1.52068	0.167822	-9.06125	1.29e-19	1.54e-18
PCDH17	288.883	1.36343	0.150555	9.05605	1.35e-19	1.61e-18
PLXNA1	903.716	1.31388	0.145193	9.04917	1.44e-19	1.71e-18
EPHX2	6466.1	-1.51657	0.167727	-9.04195	1.54e-19	1.82e-18
PDE7B	157.367	-1.66673	0.184365	-9.04036	1.56e-19	1.84e-18
ECEL1	108.306	4.35942	0.482215	9.0404	1.56e-19	1.84e-18
TSPO2	34.1978	2.21265	0.244785	9.03912	1.58e-19	1.86e-18
PIM1	2072.48	-1.38507	0.153282	-9.0361	1.62e-19	1.91e-18
HOXA11	11.1829	5.17867	0.573121	9.0359	1.63e-19	1.91e-18
FBN3	89.6866	3.1938	0.353492	9.03501	1.64e-19	1.92e-18
CXCL14	417.415	-3.53978	0.391817	-9.03427	1.65e-19	1.94e-18
TNNC1	113.596	2.8934	0.320523	9.02713	1.76e-19	2.06e-18
TEX11	50.5276	3.92709	0.435064	9.02649	1.77e-19	2.07e-18
SUCLG2	6693.05	-1.05256	0.116652	-9.02301	1.83e-19	2.14e-18
MAN1A1	7733.43	-1.17761	0.130531	-9.02169	1.85e-19	2.16e-18
PALM2	60.1339	-1.78697	0.198095	-9.02079	1.87e-19	2.18e-18
BDKRB1	28.9814	2.47053	0.273916	9.0193	1.89e-19	2.2e-18
WFS1	1847.62	1.03345	0.114642	9.01458	1.98e-19	2.3e-18
CUEDC1	830.107	1.0497	0.116461	9.01334	2e-19	2.32e-18
CASKIN1	12.5242	3.60182	0.399918	9.0064	2.13e-19	2.47e-18
TESC	1254.08	2.79062	0.309953	9.00337	2.19e-19	2.54e-18
NRCAM	496.159	3.28007	0.364343	9.0027	2.2e-19	2.55e-18
SP5	449.947	2.47674	0.27511	9.00271	2.2e-19	2.55e-18
SPAG5	1251.88	1.35703	0.150856	8.99554	2.35e-19	2.72e-18
SLC41A2	2554.75	-1.36682	0.152101	-8.98627	2.56e-19	2.96e-18
BRICD5	92.1928	1.40412	0.156256	8.98599	2.56e-19	2.96e-18
ANKRD65	332.824	2.5047	0.279101	8.97416	2.86e-19	3.28e-18
HIST2H4A	16.7897	2.05001	0.228487	8.97212	2.91e-19	3.34e-18
IGDCC4	51.8745	2.97931	0.332075	8.9718	2.92e-19	3.35e-18
PCDHB2	59.7424	2.91742	0.325675	8.95806	3.3e-19	3.77e-18
MCCD1	45.7347	5.23943	0.584907	8.95771	3.31e-19	3.78e-18
CFI	20228.7	-1.36285	0.152157	-8.95691	3.34e-19	3.81e-18
HMGA2	49.9887	4.49591	0.502339	8.94995	3.56e-19	4.05e-18
VMO1	158.417	-1.3865	0.154933	-8.94906	3.59e-19	4.08e-18
CA4	62.7727	3.25699	0.36396	8.94878	3.59e-19	4.09e-18
MCC	789.372	-1.72807	0.193143	-8.94707	3.65e-19	4.15e-18
HOXB9	9.14874	4.89097	0.546664	8.94694	3.65e-19	4.15e-18
ZNF385D	140.219	3.26044	0.364464	8.94584	3.69e-19	4.19e-18
CAMK2N2	103.516	2.366	0.264481	8.94583	3.69e-19	4.19e-18
HAVCR1	26.3299	3.93779	0.440261	8.94422	3.75e-19	4.25e-18
VCX	12.662	5.59004	0.62508	8.94291	3.79e-19	4.29e-18
DCAF8L2	22.8663	6.61729	0.740101	8.94106	3.85e-19	4.36e-18
CPNE7	136.943	2.72136	0.304401	8.94007	3.89e-19	4.4e-18
CLDN15	2052.09	1.81885	0.203477	8.93885	3.93e-19	4.44e-18
DCAF4L1	17.3026	2.15282	0.240848	8.93849	3.95e-19	4.45e-18
NES	1647.65	1.27514	0.142752	8.93256	4.16e-19	4.69e-18
TKT	13523.7	1.51406	0.169629	8.92571	4.43e-19	4.98e-18
CEMIP	223.599	2.42519	0.271722	8.92527	4.45e-19	5e-18
CDH9	14.4902	7.74694	0.868008	8.92497	4.46e-19	5.01e-18
HTR1D	96.2145	3.93263	0.440645	8.92472	4.47e-19	5.02e-18
BTNL8	237.391	3.63113	0.407223	8.91681	4.8e-19	5.38e-18
ACTG2	279.13	1.8973	0.212789	8.91636	4.82e-19	5.4e-18
RCL1	1791.78	-1.45823	0.163554	-8.9159	4.84e-19	5.42e-18
SARDH	5727.25	-1.48083	0.166113	-8.91456	4.9e-19	5.48e-18
PLEKHG2	637.936	1.13526	0.127357	8.91399	4.92e-19	5.51e-18
DSCR4	16.88	8.60947	0.966105	8.91153	5.03e-19	5.63e-18
JPT1	2191.56	1.32679	0.148929	8.90888	5.16e-19	5.75e-18
HIST1H2BG	39.3531	2.2026	0.24725	8.9084	5.18e-19	5.77e-18
LRRC37A3	130.265	1.40168	0.15739	8.90573	5.3e-19	5.91e-18
NECTIN1	765.535	1.24965	0.140336	8.90473	5.35e-19	5.96e-18
CLVS1	23.303	2.43082	0.273103	8.90073	5.55e-19	6.16e-18
ADAM11	37.0986	2.31343	0.259922	8.90049	5.56e-19	6.17e-18
FAM81A	48.0273	2.09189	0.235192	8.89439	5.87e-19	6.51e-18
PHPT1	3519.23	1.2445	0.140123	8.88148	6.6e-19	7.31e-18
GPC2	16.1317	2.12765	0.239567	8.88125	6.61e-19	7.32e-18
CHKA	1867.36	1.12813	0.127101	8.87584	6.94e-19	7.67e-18
NTM	88.1518	2.95473	0.333004	8.87294	7.12e-19	7.87e-18
MYO15B	2298.68	1.40759	0.158646	8.87249	7.15e-19	7.89e-18
FBP1	16408.7	-2.01443	0.227233	-8.86504	7.65e-19	8.43e-18
SPOCD1	24.8454	2.44523	0.275936	8.86159	7.89e-19	8.69e-18
FIGNL1	307.555	1.09817	0.123931	8.8611	7.92e-19	8.72e-18
DNER	37.0859	5.05239	0.570372	8.85806	8.14e-19	8.93e-18
ACADM	5338.35	-1.28021	0.144551	-8.85648	8.26e-19	9.03e-18
SNX22	538.465	1.85781	0.209891	8.8513	8.65e-19	9.46e-18
ASPA	185.444	-1.92317	0.217353	-8.84814	8.9e-19	9.72e-18
VSIG4	502.99	-1.89305	0.213989	-8.8465	9.03e-19	9.86e-18
SLC39A10	441.13	1.26954	0.143513	8.84617	9.06e-19	9.88e-18
ZNF580	473.757	1.15858	0.130974	8.84593	9.08e-19	9.9e-18
TMCO3	1756.03	1.25405	0.141777	8.84519	9.14e-19	9.96e-18
TNFSF4	161.618	1.75392	0.198353	8.84246	9.36e-19	1.02e-17
PYCR1	911.387	2.53116	0.286359	8.8391	9.65e-19	1.05e-17
LAMA3	1216.74	2.26773	0.256664	8.83542	9.97e-19	1.08e-17
GAREM1	561.636	-1.33116	0.150669	-8.83501	1e-18	1.09e-17
TMEM56	5687.98	-1.39688	0.158136	-8.8334	1.02e-18	1.1e-17
ITGA2	386.422	1.94417	0.220131	8.83189	1.03e-18	1.11e-17
MSS51	35.4039	1.28575	0.145596	8.83096	1.04e-18	1.12e-17
BRCA2	135.896	1.30509	0.147828	8.82844	1.06e-18	1.15e-17
BOLA2B	23.8535	1.75363	0.198677	8.82653	1.08e-18	1.17e-17
DPF3	95.9966	-1.85244	0.209922	-8.82442	1.1e-18	1.19e-17
SNX15	24.2611	1.15204	0.130589	8.82188	1.13e-18	1.21e-17
WDR66	51.3825	-1.58532	0.179775	-8.81838	1.16e-18	1.25e-17
CD300E	51.7022	-1.68811	0.191439	-8.81801	1.17e-18	1.25e-17
HES2	32.4517	2.90639	0.329804	8.81249	1.22e-18	1.32e-17
COL25A1	19.7393	-2.6518	0.300939	-8.81176	1.23e-18	1.32e-17
SMPX	49.1616	3.32242	0.377196	8.80822	1.27e-18	1.36e-17
ZNF681	70.1882	2.09573	0.237974	8.80658	1.29e-18	1.38e-17
CCDC154	40.7562	1.90746	0.216594	8.80664	1.29e-18	1.38e-17
MAP7D2	133.55	3.41304	0.387639	8.80467	1.31e-18	1.41e-17
C1S	102900	-1.32831	0.150882	-8.80367	1.32e-18	1.42e-17
STARD5	273.203	-1.49802	0.170166	-8.80329	1.33e-18	1.42e-17
SLC22A12	379.747	4.52321	0.51381	8.80328	1.33e-18	1.42e-17
C12ORF56	24.4029	4.46813	0.50759	8.80264	1.34e-18	1.43e-17
CXCR1	20.9961	-2.30485	0.261863	-8.80173	1.35e-18	1.44e-17
APLP1	156.721	2.69146	0.305867	8.79942	1.38e-18	1.47e-17
GRAMD1C	534.074	-1.58639	0.180313	-8.79798	1.39e-18	1.48e-17
PAGE2	56.1408	7.75477	0.88154	8.79684	1.41e-18	1.5e-17
HEY1	261.558	1.33204	0.151438	8.79597	1.42e-18	1.51e-17
POC1A	472.031	1.12351	0.127736	8.79559	1.42e-18	1.51e-17
SCP2	21083.6	-1.3762	0.156468	-8.79542	1.43e-18	1.52e-17
CCDC187	121.005	3.75131	0.42655	8.79453	1.44e-18	1.53e-17
GCH1	2126.17	-1.52197	0.173213	-8.78671	1.54e-18	1.63e-17
GABRR3	32.3653	4.02937	0.458853	8.78138	1.61e-18	1.71e-17
GBP2	3960.37	1.38961	0.158282	8.77931	1.64e-18	1.74e-17
KCNH4	21.0934	2.27672	0.259363	8.7781	1.66e-18	1.76e-17
IRX3	223.693	2.50948	0.285935	8.77642	1.69e-18	1.79e-17
RFC3	364.774	1.04694	0.119304	8.77537	1.7e-18	1.8e-17
FHAD1	36.0447	2.16976	0.247319	8.77315	1.74e-18	1.83e-17
FAM24B	21.0958	1.92568	0.21953	8.77183	1.76e-18	1.85e-17
PPP1R14D	25.2869	3.54972	0.404963	8.76556	1.86e-18	1.96e-17
WDR97	90.7039	1.55158	0.177038	8.76412	1.88e-18	1.98e-17
PRRT2	27.1479	1.60655	0.183397	8.75996	1.95e-18	2.05e-17
FAM50A	3900.47	1.09604	0.125221	8.75289	2.08e-18	2.18e-17
RGS5	4345.81	1.43328	0.163812	8.74953	2.14e-18	2.25e-17
ESR1	599.453	-2.46078	0.281286	-8.74834	2.17e-18	2.27e-17
MAPK11	384.534	1.42892	0.163338	8.74825	2.17e-18	2.27e-17
SYP	108.463	1.79664	0.205525	8.74171	2.3e-18	2.4e-17
FAP	107.949	2.38005	0.272304	8.74042	2.32e-18	2.43e-17
BNIPL	31.0647	1.4815	0.169513	8.73974	2.34e-18	2.44e-17
GABRA3	38.2818	6.0613	0.693657	8.73818	2.37e-18	2.47e-17
XAGE5	28.9142	7.70858	0.882199	8.73792	2.37e-18	2.48e-17
FAM149A	854.307	-1.35947	0.155619	-8.73586	2.42e-18	2.52e-17
ASS1	50659.9	-1.74777	0.200079	-8.7354	2.43e-18	2.53e-17
BPIFB4	10.5063	4.42923	0.507264	8.73161	2.51e-18	2.61e-17
KPNA7	57.8951	2.13672	0.244885	8.7254	2.65e-18	2.75e-17
DSE	358.573	-1.41515	0.162266	-8.72117	2.75e-18	2.86e-17
MDFI	148.037	2.43322	0.279124	8.71735	2.85e-18	2.95e-17
PDE2A	476.039	-1.48101	0.169918	-8.71605	2.88e-18	2.99e-17
DAND5	7.00492	3.05481	0.350578	8.71363	2.94e-18	3.05e-17
DUSP13	9.04044	4.52142	0.518924	8.71307	2.96e-18	3.06e-17
SLC35E4	85.8179	1.36061	0.156161	8.71285	2.96e-18	3.07e-17
ANKS1B	61.6445	2.66154	0.305719	8.70584	3.15e-18	3.26e-17
KBTBD11	362.639	-2.33577	0.268366	-8.70368	3.21e-18	3.32e-17
ZNF213	314.141	1.03485	0.118985	8.69734	3.4e-18	3.5e-17
SMPD3	128.89	-1.93097	0.222038	-8.69657	3.42e-18	3.52e-17
GHRHR	75.528	3.72224	0.428136	8.69406	3.5e-18	3.6e-17
ABAT	15681	-1.60566	0.184726	-8.69213	3.56e-18	3.66e-17
BARD1	162.575	1.25952	0.144951	8.68925	3.65e-18	3.75e-17
FAM178B	44.41	4.49648	0.517496	8.68893	3.66e-18	3.76e-17
PRRT3	76.2059	1.0681	0.122946	8.68751	3.7e-18	3.8e-17
TTLL4	1009.07	1.45306	0.167277	8.68654	3.74e-18	3.83e-17
DNAH12	41.729	2.69881	0.31073	8.6854	3.77e-18	3.87e-17
PGP	1025.94	1.18086	0.13599	8.68349	3.84e-18	3.93e-17
ANKRD23	27.7373	1.18263	0.136295	8.67693	4.07e-18	4.16e-17
AXL	599.264	-1.3639	0.157226	-8.6748	4.14e-18	4.23e-17
STEAP1B	9.38072	2.91939	0.336658	8.67167	4.26e-18	4.35e-17
CD5L	1052.67	-3.00055	0.346042	-8.67105	4.28e-18	4.37e-17
HIST1H3H	155.661	1.99196	0.229813	8.66774	4.41e-18	4.49e-17
TUBB4A	447.097	3.21363	0.370788	8.66703	4.44e-18	4.51e-17
C19ORF81	14.8462	4.88108	0.563675	8.65938	4.74e-18	4.82e-17
VSIG10L	410.209	2.09316	0.24184	8.65514	4.92e-18	5e-17
CGREF1	1151.26	1.95275	0.225638	8.65433	4.96e-18	5.03e-17
PNPLA7	571.56	-1.3674	0.15803	-8.65277	5.03e-18	5.1e-17
MS4A7	759.119	-1.47513	0.170542	-8.64962	5.17e-18	5.24e-17
CALY	13.6838	3.39883	0.392974	8.649	5.2e-18	5.26e-17
PDE1C	30.2712	2.09412	0.242311	8.64225	5.51e-18	5.58e-17
MMS22L	187.868	1.2942	0.149789	8.64014	5.61e-18	5.68e-17
KLKB1	5106.33	-1.61592	0.187395	-8.62304	6.52e-18	6.57e-17
SLC45A4	448.668	2.00129	0.232137	8.62116	6.63e-18	6.67e-17
AL163636.2	57.5089	-1.35502	0.157214	-8.61894	6.76e-18	6.8e-17
DBN1	1177.32	1.75637	0.203849	8.61605	6.93e-18	6.96e-17
HIST2H2BF	25.4396	2.03701	0.236422	8.61598	6.93e-18	6.96e-17
PRDM15	365.174	1.29731	0.15059	8.61482	7.01e-18	7.03e-17
TMEM198	287.843	1.44405	0.167654	8.61324	7.1e-18	7.12e-17
GNB1L	251.449	1.03801	0.120591	8.60768	7.46e-18	7.47e-17
CXCL17	43.8246	3.14602	0.365504	8.60736	7.48e-18	7.48e-17
CCDC180	24.6712	1.77471	0.206221	8.60588	7.57e-18	7.58e-17
C11ORF80	235.159	1.26863	0.147419	8.60561	7.59e-18	7.59e-17
STRA8	10.2298	4.1125	0.478028	8.60305	7.76e-18	7.76e-17
SULT4A1	120.132	4.56009	0.530063	8.60292	7.77e-18	7.76e-17
MCMDC2	71.9992	1.22319	0.14219	8.60251	7.8e-18	7.78e-17
HAMP	6441.03	-3.57887	0.416132	-8.60033	7.95e-18	7.93e-17
RHO	5.39665	3.66636	0.426482	8.59674	8.2e-18	8.17e-17
CYP2W1	17.6666	2.78232	0.324211	8.58181	9.34e-18	9.28e-17
SQLE	4248.71	1.63481	0.1905	8.58165	9.35e-18	9.29e-17
CNDP1	764.738	-3.26296	0.380237	-8.58139	9.37e-18	9.3e-17
BACH2	151.773	-1.71149	0.199462	-8.58055	9.44e-18	9.37e-17
GOLGA6L9	58.7637	1.17247	0.13667	8.57883	9.58e-18	9.5e-17
CYP4A22	5559.28	-2.16144	0.251958	-8.57857	9.61e-18	9.52e-17
DLX1	9.95503	4.26043	0.49668	8.57781	9.67e-18	9.58e-17
CNTNAP4	62.2047	4.52275	0.52738	8.57589	9.83e-18	9.73e-17
APOL6	5363.25	-1.11174	0.129644	-8.5753	9.88e-18	9.78e-17
PCDHGA1	31.7932	2.38934	0.27867	8.57409	9.99e-18	9.87e-17
BSG	20126.3	1.0305	0.120218	8.57195	1.02e-17	1e-16
LOXHD1	7.4415	2.78483	0.324958	8.56984	1.04e-17	1.02e-16
DDX11	510.247	1.26159	0.147215	8.56968	1.04e-17	1.02e-16
FRRS1L	33.3551	4.09952	0.478444	8.56845	1.05e-17	1.03e-16
SPRED3	24.4911	1.85864	0.216986	8.56572	1.07e-17	1.06e-16
CDKN2AIPNL	1019.86	1.01693	0.118781	8.56141	1.11e-17	1.1e-16
DNASE1	284.799	1.0776	0.125878	8.56069	1.12e-17	1.1e-16
SMIM14	9264.02	-1.08296	0.126561	-8.55687	1.16e-17	1.14e-16
NKX3-2	8.329	4.34586	0.508037	8.55422	1.19e-17	1.16e-16
SASS6	151.909	1.04427	0.122099	8.55262	1.2e-17	1.18e-16
GLYATL1	5331.14	-2.04664	0.239382	-8.54971	1.23e-17	1.21e-16
TPPP2	90.0929	-2.1352	0.249756	-8.54915	1.24e-17	1.21e-16
EPHB2	473.452	2.48728	0.290951	8.54878	1.24e-17	1.22e-16
ID1	1527.2	-1.78763	0.209229	-8.54389	1.3e-17	1.27e-16
C8A	13278.8	-1.8233	0.213547	-8.53815	1.36e-17	1.33e-16
CBR3	69.7647	1.934	0.226528	8.53755	1.37e-17	1.34e-16
ST8SIA6	9.52564	-2.43725	0.285505	-8.53664	1.38e-17	1.35e-16
ANXA2	14194.2	1.17966	0.138207	8.53542	1.4e-17	1.36e-16
CRHR2	15.3715	1.76942	0.207426	8.53036	1.46e-17	1.42e-16
SP8	18.4061	5.95725	0.69875	8.52557	1.52e-17	1.48e-16
DKK4	123.976	4.09318	0.480171	8.52443	1.54e-17	1.49e-16
PRICKLE4	9.46628	1.57417	0.184738	8.52113	1.58e-17	1.53e-16
C20ORF144	5.40789	2.40295	0.282016	8.52063	1.59e-17	1.54e-16
CDRT1	19.0371	3.22073	0.378136	8.51739	1.63e-17	1.58e-16
AFF2	24.0296	3.56482	0.418553	8.51701	1.64e-17	1.58e-16
NME1	2734	1.20436	0.14141	8.51682	1.64e-17	1.59e-16
FBXO32	574.127	1.69584	0.199125	8.51647	1.64e-17	1.59e-16
VWF	3596.6	1.5553	0.182649	8.51524	1.66e-17	1.61e-16
CHP2	21.6424	6.80076	0.798825	8.51345	1.69e-17	1.63e-16
RELL2	57.0846	1.31753	0.154803	8.51097	1.72e-17	1.66e-16
LZTS1	219.446	1.40331	0.164913	8.5094	1.75e-17	1.68e-16
PFKFB4	180.037	1.61845	0.190208	8.50882	1.76e-17	1.69e-16
PTK7	615.428	2.22492	0.26177	8.49953	1.9e-17	1.83e-16
MT2A	38670.9	-2.42877	0.285918	-8.49464	1.99e-17	1.91e-16
EPHA10	51.2485	3.4508	0.406324	8.49271	2.02e-17	1.94e-16
SHOX2	15.2064	2.81429	0.331481	8.49007	2.07e-17	1.98e-16
SCML2	147.402	1.33932	0.157795	8.4877	2.11e-17	2.02e-16
ZNF618	650.393	1.05278	0.124066	8.48568	2.14e-17	2.05e-16
UNKL	366.404	1.04027	0.122691	8.47874	2.28e-17	2.18e-16
ADAMTS1	1403.75	-1.55585	0.18373	-8.46813	2.49e-17	2.38e-16
HIST1H2BN	97.8065	1.52612	0.180292	8.46471	2.57e-17	2.45e-16
FBXL22	26.0773	1.16669	0.137849	8.46348	2.6e-17	2.47e-16
PLAC8	148.776	-2.27456	0.268802	-8.46183	2.63e-17	2.5e-16
LAPTM4B	5167.82	1.56027	0.184423	8.46026	2.67e-17	2.53e-16
RAP2A	1466.42	1.02103	0.120741	8.45633	2.76e-17	2.62e-16
FBXL6	1377.75	1.13808	0.134609	8.4547	2.8e-17	2.65e-16
NAMPT	8625.89	-1.50479	0.177987	-8.4545	2.8e-17	2.66e-16
BRIP1	210.004	1.37804	0.163088	8.4497	2.92e-17	2.77e-16
CATSPER2	65.6975	1.24193	0.146994	8.44889	2.94e-17	2.78e-16
SPDYA	15.3012	1.37551	0.162843	8.44681	2.99e-17	2.83e-16
PHLDB2	1452.26	-1.0124	0.119895	-8.44405	3.07e-17	2.89e-16
CHRNB4	11.8433	2.47965	0.293763	8.441	3.15e-17	2.97e-16
NR3C2	373.666	-1.36743	0.162017	-8.44001	3.17e-17	2.99e-16
PFKFB2	593.005	1.21977	0.144628	8.43389	3.34e-17	3.15e-16
CLCNKA	37.7298	2.66561	0.316277	8.42807	3.51e-17	3.3e-16
ZP3	96.4994	1.65145	0.196017	8.42504	3.61e-17	3.39e-16
GCDH	3606.84	-1.28964	0.153081	-8.42459	3.62e-17	3.4e-16
KCNJ5	214.753	1.91478	0.227427	8.4193	3.79e-17	3.55e-16
DLL4	612.914	1.07282	0.127465	8.41663	3.87e-17	3.63e-16
TMEM178B	97.5142	2.73796	0.325351	8.41538	3.92e-17	3.67e-16
C6	15772.1	-1.94746	0.231427	-8.41502	3.93e-17	3.68e-16
F8	690.699	-1.29115	0.153507	-8.41105	4.06e-17	3.8e-16
NR6A1	299.977	1.26303	0.150189	8.4096	4.11e-17	3.84e-16
SLC22A10	1417.59	-2.30015	0.273531	-8.40911	4.13e-17	3.86e-16
DTNA	783.137	1.75017	0.208164	8.40767	4.18e-17	3.9e-16
LIMK1	759.359	1.22741	0.146055	8.40375	4.32e-17	4.03e-16
CCR1	250.712	-1.50346	0.178933	-8.40234	4.38e-17	4.08e-16
C8ORF76	454.967	1.03835	0.123585	8.40192	4.39e-17	4.09e-16
PKM	7627.36	1.82532	0.217326	8.399	4.5e-17	4.18e-16
SYT3	41.7162	3.51784	0.418953	8.39675	4.59e-17	4.26e-16
LHFPL4	46.8476	4.55813	0.54302	8.39403	4.7e-17	4.36e-16
KCNF1	66.1898	3.31443	0.395013	8.39068	4.83e-17	4.48e-16
CDKN2B	351.406	1.33355	0.15899	8.38766	4.96e-17	4.59e-16
IGF2BP2	737.89	2.2988	0.274129	8.38583	5.04e-17	4.66e-16
DRP2	4.8453	3.52971	0.42094	8.38531	5.06e-17	4.68e-16
ZNF607	111.453	1.56706	0.186914	8.38385	5.12e-17	4.73e-16
DMD	1710.71	-1.30312	0.155457	-8.38255	5.18e-17	4.79e-16
ALDH1B1	7046.5	-1.33589	0.159378	-8.38186	5.21e-17	4.81e-16
MYOM2	103.962	-2.0495	0.244529	-8.38144	5.23e-17	4.83e-16
ORM1	150675	-1.81997	0.217237	-8.37782	5.39e-17	4.96e-16
FAM155B	72.7692	2.68594	0.320717	8.37478	5.53e-17	5.09e-16
CACNG4	180.282	3.61261	0.431422	8.37372	5.58e-17	5.13e-16
CEND1	10.7886	2.33645	0.279106	8.3712	5.7e-17	5.24e-16
GPHN	1414.66	-1.21689	0.14538	-8.37043	5.74e-17	5.27e-16
FEZ1	231.42	-1.43905	0.17196	-8.36851	5.84e-17	5.35e-16
BFSP2	11.2211	3.04567	0.364182	8.36303	6.11e-17	5.6e-16
CDK5R1	90.0983	1.26518	0.15131	8.36148	6.19e-17	5.67e-16
ARHGAP10	321.668	-1.4753	0.176477	-8.35968	6.29e-17	5.75e-16
CMTM4	542.861	1.2715	0.152135	8.35767	6.4e-17	5.85e-16
KCNN1	16.9157	2.62688	0.314357	8.35636	6.47e-17	5.91e-16
ZNF385C	61.4776	1.92692	0.230598	8.35619	6.48e-17	5.91e-16
PLCB1	668.417	1.51701	0.181576	8.3547	6.56e-17	5.99e-16
AGTR1	1946.22	-1.44881	0.17343	-8.35385	6.61e-17	6.03e-16
DMC1	19.7443	2.34286	0.280553	8.35087	6.78e-17	6.18e-16
OMG	9.32771	-1.69668	0.203214	-8.34924	6.87e-17	6.26e-16
STC2	417.732	1.88922	0.226295	8.3485	6.91e-17	6.3e-16
STXBP4	303.529	1.05086	0.125997	8.34035	7.41e-17	6.74e-16
PAQR6	104.35	1.58723	0.190394	8.33655	7.65e-17	6.95e-16
NRIP2	128.725	1.16307	0.13955	8.33445	7.79e-17	7.07e-16
PNMA5	28.2289	4.35993	0.523263	8.33219	7.94e-17	7.2e-16
BPIFA2	9.81336	5.22035	0.626649	8.33057	8.05e-17	7.29e-16
ALOX15B	89.0399	2.9831	0.358096	8.33045	8.05e-17	7.3e-16
KLF13	2732.88	1.06089	0.127395	8.32759	8.25e-17	7.47e-16
INPP5J	52.7679	2.07336	0.249029	8.32581	8.38e-17	7.57e-16
DMBX1	8.58719	4.62651	0.555767	8.32456	8.46e-17	7.65e-16
FHDC1	60.9604	1.98316	0.238242	8.32412	8.5e-17	7.67e-16
ZSWIM5	307.152	1.89842	0.228117	8.32211	8.64e-17	7.8e-16
OXLD1	914.907	1.01529	0.122003	8.32179	8.66e-17	7.82e-16
CYP39A1	1084.88	-2.43412	0.292557	-8.32016	8.78e-17	7.92e-16
C18ORF54	62.8033	1.40594	0.16899	8.31966	8.82e-17	7.95e-16
ASPHD1	299.705	2.75836	0.33155	8.31959	8.83e-17	7.95e-16
SMKR1	15.3797	2.91672	0.35065	8.31803	8.94e-17	8.05e-16
KCNQ3	24.0749	2.11007	0.253772	8.3148	9.19e-17	8.26e-16
ACOT2	1651.98	-1.07981	0.129877	-8.31404	9.25e-17	8.31e-16
TMPRSS15	23.2805	6.62445	0.796878	8.31301	9.33e-17	8.38e-16
NR0B1	19.3598	6.12412	0.737125	8.30812	9.72e-17	8.71e-16
ACVR1C	84.6567	-1.66087	0.200037	-8.30284	1.02e-16	9.1e-16
TSLP	126.004	-2.32571	0.280145	-8.30182	1.03e-16	9.17e-16
UCN2	4.9035	3.91705	0.471937	8.29994	1.04e-16	9.31e-16
CD244	56.8317	-1.66916	0.201116	-8.29952	1.05e-16	9.33e-16
PRDM7	7.43573	3.17536	0.382614	8.29911	1.05e-16	9.36e-16
C12ORF75	547.49	2.15163	0.259364	8.29578	1.08e-16	9.62e-16
COMP	126.586	3.42692	0.413243	8.29273	1.11e-16	9.86e-16
ESCO2	97.3842	1.64215	0.198074	8.29061	1.13e-16	1e-15
UQCC2	1963.58	1.01641	0.122607	8.29001	1.13e-16	1.01e-15
C1QTNF6	834.754	1.21116	0.146135	8.28794	1.15e-16	1.02e-15
TMEM136	128.552	1.35276	0.163228	8.28755	1.16e-16	1.03e-15
ZNF716	16.2422	5.60214	0.676184	8.28494	1.18e-16	1.05e-15
GJA5	339.92	1.52566	0.184163	8.28427	1.19e-16	1.05e-15
S100A10	6245.51	1.26652	0.152915	8.2825	1.21e-16	1.07e-15
PON3	7606.13	-1.52143	0.183723	-8.28115	1.22e-16	1.08e-15
ZNF71	182.818	1.09992	0.132838	8.28018	1.23e-16	1.09e-15
PDZK1IP1	2673.98	2.99323	0.361542	8.27905	1.24e-16	1.1e-15
PLGLB2	180.871	-1.89444	0.228916	-8.27572	1.28e-16	1.13e-15
INHA	37.1056	3.3188	0.401166	8.27289	1.31e-16	1.16e-15
FABP4	450.758	2.38427	0.28833	8.26922	1.35e-16	1.19e-15
HOGA1	1201.69	-1.8045	0.218268	-8.26737	1.37e-16	1.21e-15
FPR1	137.395	-1.93676	0.234352	-8.26431	1.41e-16	1.24e-15
REG1B	46.8741	7.98081	0.965882	8.26271	1.42e-16	1.26e-15
TNFRSF18	77.1761	1.97903	0.239656	8.2578	1.48e-16	1.31e-15
SERPING1	125771	-1.21497	0.147208	-8.25341	1.54e-16	1.36e-15
CCER2	22.4483	1.80333	0.218543	8.25158	1.56e-16	1.37e-15
ATP11C	1359.18	-1.2784	0.154962	-8.24974	1.59e-16	1.39e-15
IDNK	779.967	-1.16759	0.141569	-8.24753	1.62e-16	1.42e-15
ADGRE1	46.4855	-2.03661	0.246952	-8.24702	1.62e-16	1.43e-15
SLC8A1	158.971	-1.3327	0.161626	-8.24558	1.64e-16	1.44e-15
ZMYND10	36.6281	1.52401	0.1849	8.24239	1.69e-16	1.48e-15
TEAD2	880.451	1.39668	0.169545	8.23779	1.75e-16	1.54e-15
IL18R1	225.142	-1.48733	0.180559	-8.23736	1.76e-16	1.54e-15
BRINP3	13.1425	5.46947	0.664454	8.23153	1.85e-16	1.62e-15
PLXNA3	654.58	1.41803	0.172319	8.22912	1.89e-16	1.65e-15
NRG2	58.5246	2.30691	0.280336	8.22908	1.89e-16	1.65e-15
FSD1L	91.2268	1.15606	0.140493	8.22859	1.89e-16	1.65e-15
ANKRD29	364.057	1.67552	0.203715	8.22481	1.95e-16	1.7e-15
C5ORF58	42.9617	3.16461	0.38477	8.22468	1.96e-16	1.71e-15
ST3GAL6	1351.03	-1.38752	0.168875	-8.21629	2.1e-16	1.82e-15
SLC7A2	10386.5	-1.71512	0.208784	-8.21482	2.12e-16	1.84e-15
PSMG3	1206.55	1.08549	0.132192	8.21144	2.19e-16	1.89e-15
CITED2	1804.28	-1.13111	0.137763	-8.21049	2.2e-16	1.91e-15
ATP2A1	39.3246	1.549	0.188715	8.20817	2.25e-16	1.94e-15
DNAH17	64.7109	1.52913	0.186337	8.20625	2.28e-16	1.97e-15
CLEC12A	45.456	-1.67747	0.204495	-8.20299	2.34e-16	2.02e-15
CCL3	208.987	-1.59018	0.193871	-8.20227	2.36e-16	2.03e-15
RHBDF2	979.56	1.06422	0.129822	8.19753	2.45e-16	2.11e-15
UGP2	14420	-1.11463	0.136049	-8.19287	2.55e-16	2.19e-15
TRAPPC3L	3.24908	-1.82776	0.223106	-8.19233	2.56e-16	2.2e-15
RHEBL1	35.5614	1.16254	0.141932	8.19081	2.59e-16	2.23e-15
PCDHA1	17.9506	4.09926	0.500526	8.1899	2.61e-16	2.24e-15
SLC34A3	6.76404	3.22295	0.393879	8.18259	2.78e-16	2.38e-15
SH2D1B	17.7026	-1.44964	0.177162	-8.18256	2.78e-16	2.38e-15
E2F5	238.34	1.17454	0.143551	8.18204	2.79e-16	2.39e-15
SIGLEC9	90.4895	-1.38785	0.169706	-8.17797	2.89e-16	2.47e-15
LAGE3	1105.44	1.15047	0.140839	8.16867	3.12e-16	2.66e-15
SLC51B	400.798	2.3781	0.291168	8.16745	3.15e-16	2.69e-15
NR4A2	518.653	-1.89167	0.231646	-8.16624	3.18e-16	2.71e-15
HGH1	2241.93	1.07603	0.131779	8.16542	3.2e-16	2.73e-15
SERPINB8	546.134	-1.46263	0.179141	-8.16469	3.22e-16	2.74e-15
ADAM23	109.654	2.6924	0.329834	8.16288	3.27e-16	2.78e-15
ADCK5	688.381	1.00919	0.123639	8.16238	3.28e-16	2.79e-15
C8B	17895.6	-1.5535	0.190335	-8.16191	3.3e-16	2.8e-15
NUDT10	10.151	-2.96526	0.36333	-8.16134	3.31e-16	2.81e-15
C8ORF59	1425.03	1.03617	0.126994	8.15917	3.37e-16	2.86e-15
PEMT	3177	-1.31236	0.160871	-8.15785	3.41e-16	2.89e-15
SPSB4	8.74143	-2.68541	0.329281	-8.15539	3.48e-16	2.94e-15
DMBT1	34.0617	3.87034	0.474689	8.15343	3.54e-16	2.99e-15
MAGEA8	14.1743	5.3482	0.655971	8.1531	3.55e-16	3e-15
GRHPR	16845.8	-1.19164	0.14625	-8.1479	3.7e-16	3.12e-15
SLC22A8	10.5084	5.02555	0.617341	8.14064	3.93e-16	3.31e-15
ARHGAP22	75.349	1.43126	0.17587	8.13815	4.01e-16	3.38e-15
CDC20B	15.3811	3.7737	0.463832	8.1359	4.09e-16	3.44e-15
PADI4	6.15566	-2.23733	0.275258	-8.12813	4.36e-16	3.65e-15
PLEKHG4	129.451	2.24657	0.276397	8.12808	4.36e-16	3.65e-15
TCF21	51.4524	-1.71768	0.211377	-8.12616	4.43e-16	3.71e-15
PSCA	11.8328	3.09023	0.380325	8.12523	4.47e-16	3.74e-15
HIST1H4E	8.56073	2.51008	0.308953	8.12446	4.49e-16	3.76e-15
KAZALD1	136.491	1.76041	0.216772	8.12099	4.62e-16	3.86e-15
CIART	335.454	1.51163	0.186148	8.12059	4.64e-16	3.87e-15
C11ORF96	1014.41	-1.87593	0.231171	-8.1149	4.86e-16	4.05e-15
PRKAR2B	87.0065	-1.87936	0.231645	-8.11309	4.94e-16	4.11e-15
FANCA	364.286	1.02364	0.126219	8.11002	5.06e-16	4.21e-15
RASGRF1	49.3607	2.59503	0.32028	8.10237	5.39e-16	4.47e-15
KAZN	127.259	-1.73097	0.213736	-8.09864	5.56e-16	4.61e-15
CR1	56.5139	-2.06882	0.255506	-8.09695	5.64e-16	4.67e-15
OR2B6	11.2091	2.3259	0.287333	8.09481	5.74e-16	4.75e-15
TAL2	6.75066	2.63971	0.326219	8.09185	5.88e-16	4.86e-15
HIST3H2A	105.232	2.74982	0.340071	8.08602	6.16e-16	5.08e-15
TXNRD1	7750.26	1.39632	0.172694	8.08553	6.19e-16	5.1e-15
ALS2CL	1356.57	1.4092	0.174338	8.08317	6.31e-16	5.19e-15
PLG	72002.3	-1.69826	0.210129	-8.082	6.37e-16	5.24e-15
SSTR5	33.9347	5.61469	0.694804	8.08098	6.42e-16	5.28e-15
HS3ST3B1	1688.37	-1.53724	0.19029	-8.07841	6.56e-16	5.38e-15
CAPN9	19.5523	2.40985	0.298477	8.07383	6.81e-16	5.57e-15
HIST1H3E	28.7249	1.68945	0.209266	8.07323	6.85e-16	5.6e-15
LRRC10B	21.491	1.71397	0.212462	8.06718	7.19e-16	5.88e-15
MAN1C1	1077.18	-1.67302	0.207391	-8.06701	7.2e-16	5.88e-15
METTL12	95.0167	1.09535	0.135859	8.06239	7.48e-16	6.09e-15
KLK2	16.8654	5.94496	0.737406	8.062	7.51e-16	6.11e-15
ACSL4	12356.1	2.18354	0.271319	8.04787	8.42e-16	6.83e-15
CCL26	15.3601	3.04383	0.378382	8.04435	8.67e-16	7.03e-15
NGFR	653.71	-2.00928	0.249858	-8.04172	8.86e-16	7.18e-15
DLX6	16.0138	5.69702	0.708561	8.04027	8.96e-16	7.26e-15
C19ORF57	110.962	1.35111	0.168043	8.04024	8.97e-16	7.26e-15
TUBA3C	60.6515	6.20544	0.771995	8.0382	9.12e-16	7.38e-15
GOLGA8A	290.264	1.75166	0.218159	8.02931	9.8e-16	7.92e-15
PABPC4L	20.0528	1.44075	0.179449	8.02873	9.85e-16	7.95e-15
LPCAT1	1828.62	1.42835	0.177994	8.02472	1.02e-15	8.2e-15
NKX3-1	109.432	-1.55585	0.193953	-8.0218	1.04e-15	8.39e-15
DUSP10	1862.13	-1.13927	0.142031	-8.02128	1.05e-15	8.42e-15
KREMEN2	18.7283	2.41825	0.301859	8.01117	1.14e-15	9.12e-15
SORL1	4846.88	-1.33851	0.167114	-8.00957	1.15e-15	9.23e-15
SYDE2	102.817	-1.26626	0.158165	-8.00599	1.19e-15	9.49e-15
KIF5A	10.0205	3.11255	0.388887	8.00373	1.21e-15	9.66e-15
BLNK	1077.54	-1.02303	0.127939	-7.9962	1.28e-15	1.03e-14
ZNF530	90.7548	1.13171	0.141597	7.9925	1.32e-15	1.06e-14
MYMX	12.1843	2.60968	0.326697	7.98809	1.37e-15	1.09e-14
MFGE8	1135.34	1.20909	0.151403	7.98591	1.39e-15	1.11e-14
GAL3ST1	740.87	2.49865	0.312918	7.985	1.41e-15	1.12e-14
RNF24	350.408	1.02193	0.127983	7.98492	1.41e-15	1.12e-14
ZIC4	93.0665	3.40681	0.426657	7.98489	1.41e-15	1.12e-14
IL1B	69.5599	-1.80162	0.225738	-7.98102	1.45e-15	1.16e-14
DMGDH	4980.1	-1.60716	0.201404	-7.97976	1.47e-15	1.17e-14
PADI3	12.8741	4.96622	0.622516	7.97766	1.49e-15	1.19e-14
SERPINH1	4391.07	1.10439	0.138439	7.97749	1.49e-15	1.19e-14
HPX	136754	-1.72249	0.215924	-7.97728	1.5e-15	1.19e-14
HHIP	200.771	-3.30198	0.413941	-7.97693	1.5e-15	1.19e-14
GPR83	7.01946	-1.84728	0.231759	-7.97071	1.58e-15	1.25e-14
LGI3	39.0747	3.30238	0.414396	7.96915	1.6e-15	1.27e-14
CA12	1068.9	2.85501	0.358468	7.96448	1.66e-15	1.31e-14
AP1M2	793.377	3.12168	0.392012	7.96323	1.68e-15	1.33e-14
CFAP53	28.4766	1.39255	0.174894	7.96223	1.69e-15	1.33e-14
CNIH2	25.3981	1.69222	0.212534	7.96209	1.69e-15	1.34e-14
ADAMTS18	13.1372	3.15944	0.397108	7.95614	1.77e-15	1.4e-14
HOXB13	24.2426	5.45114	0.685188	7.95569	1.78e-15	1.41e-14
CCSAP	360.895	1.02034	0.128281	7.95392	1.81e-15	1.43e-14
ELL3	17.3943	1.2044	0.151476	7.95108	1.85e-15	1.46e-14
PKN1	4932.66	1.05506	0.13275	7.94777	1.9e-15	1.49e-14
CKLF	286.587	1.04983	0.132141	7.94473	1.95e-15	1.53e-14
LRG1	32447.6	-1.64056	0.206512	-7.94414	1.96e-15	1.54e-14
HBB	1135.37	-2.05806	0.259123	-7.94242	1.98e-15	1.56e-14
SRD5A1	2582.08	-1.32615	0.166997	-7.94113	2e-15	1.57e-14
TEX26	2.41304	-3.79704	0.478311	-7.93842	2.05e-15	1.6e-14
CHRM2	14.3046	-3.76799	0.474687	-7.93785	2.06e-15	1.61e-14
TTC36	1164.84	-2.75349	0.347043	-7.93415	2.12e-15	1.66e-14
LY6G5B	48.1711	1.36131	0.171585	7.93373	2.13e-15	1.66e-14
SPATC1	15.5318	1.56314	0.197396	7.9188	2.4e-15	1.87e-14
ANKRD34A	28.3885	1.10865	0.140043	7.91652	2.44e-15	1.91e-14
B4GALNT4	123.919	3.49717	0.441997	7.9122	2.53e-15	1.97e-14
MT1F	3075.73	-2.9003	0.366886	-7.90517	2.68e-15	2.08e-14
BEND3	164.733	1.15648	0.146298	7.90494	2.68e-15	2.09e-14
NLRP12	6.59968	-1.38042	0.174659	-7.90349	2.71e-15	2.11e-14
BLVRA	912.928	1.26833	0.160504	7.90217	2.74e-15	2.13e-14
VAMP1	259.093	1.04576	0.132392	7.89891	2.81e-15	2.18e-14
IFI27L1	447.705	1.06532	0.134974	7.89274	2.96e-15	2.29e-14
KCNH6	16.7834	3.66549	0.464518	7.89095	3e-15	2.32e-14
NIPAL1	400.148	-1.67312	0.212087	-7.88885	3.05e-15	2.36e-14
EXTL1	11.6729	2.47393	0.313603	7.88871	3.05e-15	2.36e-14
RSPO3	74.6444	-2.88695	0.366133	-7.88498	3.15e-15	2.43e-14
APC2	128.74	1.04686	0.13278	7.88421	3.17e-15	2.44e-14
KRT12	19.0574	5.53823	0.702657	7.88184	3.23e-15	2.49e-14
ARTN	19.4859	1.79902	0.228266	7.88124	3.24e-15	2.5e-14
TBKBP1	326.885	1.06822	0.135613	7.87694	3.35e-15	2.59e-14
CCDC102B	143.644	1.29028	0.163832	7.87562	3.39e-15	2.61e-14
FER1L5	9.59184	2.3411	0.29733	7.87376	3.44e-15	2.65e-14
FGF13	279.877	1.924	0.244421	7.87168	3.5e-15	2.69e-14
HPDL	21.6627	2.32087	0.294882	7.87052	3.53e-15	2.72e-14
AQP7	556.25	-1.24232	0.157897	-7.86796	3.6e-15	2.77e-14
AACS	675.202	1.00256	0.12753	7.86135	3.8e-15	2.91e-14
ACACB	4507.58	-1.20506	0.153322	-7.85966	3.85e-15	2.95e-14
KIAA0040	983.567	-1.09493	0.139319	-7.85913	3.87e-15	2.96e-14
MYBL1	178.459	1.20974	0.153947	7.8582	3.9e-15	2.98e-14
PTGES	228.166	2.7165	0.345743	7.85699	3.93e-15	3.01e-14
TRIM31	457.935	2.32245	0.295759	7.8525	4.08e-15	3.12e-14
LMNB1	1012.16	1.21542	0.15481	7.85104	4.13e-15	3.15e-14
KLHL31	48.1634	1.27441	0.162327	7.85088	4.13e-15	3.15e-14
GDPD1	108.43	1.15029	0.146629	7.84492	4.33e-15	3.3e-14
UNC5A	23.8107	2.17748	0.27758	7.84451	4.35e-15	3.31e-14
HIST1H1B	3.402	3.09826	0.395003	7.84364	4.38e-15	3.33e-14
FBLIM1	1117.91	1.35225	0.172414	7.84306	4.4e-15	3.34e-14
FAM182B	11.3472	2.14851	0.273976	7.84198	4.44e-15	3.37e-14
FAM3B	852.543	2.99376	0.382064	7.83575	4.66e-15	3.53e-14
RANBP3L	108.892	-2.32269	0.296619	-7.83055	4.86e-15	3.68e-14
SOX11	9.70711	3.68501	0.470737	7.82817	4.95e-15	3.75e-14
PLP2	1692.26	1.5248	0.194936	7.82203	5.2e-15	3.93e-14
VKORC1	3359.63	-1.01459	0.129784	-7.81757	5.39e-15	4.06e-14
PYCR3	1350.34	1.0485	0.134138	7.81654	5.43e-15	4.09e-14
SORT1	2289.7	1.21382	0.155287	7.81658	5.43e-15	4.09e-14
PTGDR2	135.233	1.95608	0.250271	7.81585	5.46e-15	4.11e-14
MT1X	14091.3	-2.51671	0.322036	-7.81499	5.5e-15	4.14e-14
HIST1H2BJ	69.8682	1.83735	0.235181	7.8125	5.61e-15	4.21e-14
RETREG1	1018.55	-2.27125	0.290766	-7.81126	5.66e-15	4.25e-14
CD300A	273.453	-1.27659	0.163504	-7.80771	5.82e-15	4.37e-14
PLA2G4C	986.662	1.26013	0.161398	7.80761	5.83e-15	4.37e-14
DUSP5	1070.74	-1.54986	0.198523	-7.80693	5.86e-15	4.39e-14
SFRP1	99.4261	-2.40796	0.308869	-7.79606	6.39e-15	4.77e-14
KIAA1211L	112.277	1.31585	0.168786	7.79592	6.39e-15	4.78e-14
GC	134224	-1.23357	0.15827	-7.79406	6.49e-15	4.84e-14
FAM162B	34.7422	1.46784	0.188518	7.78621	6.9e-15	5.15e-14
ABHD6	1694.23	-1.06617	0.136982	-7.78329	7.07e-15	5.26e-14
PRDM9	4.68125	3.74277	0.481094	7.7797	7.27e-15	5.41e-14
GNAO1	581.116	-2.23484	0.287304	-7.77868	7.33e-15	5.45e-14
CCDC188	9.12114	1.40358	0.180448	7.77827	7.35e-15	5.47e-14
DCN	4689.29	-2.30587	0.296489	-7.77724	7.41e-15	5.51e-14
FEZF1	7.2303	4.43174	0.570468	7.7686	7.94e-15	5.89e-14
FAM229A	97.4914	1.05802	0.13625	7.7653	8.15e-15	6.04e-14
AFM	9313.05	-1.90036	0.244789	-7.76324	8.28e-15	6.13e-14
MANF	4466.96	1.02478	0.132035	7.76141	8.4e-15	6.22e-14
GRIK4	35.4459	2.6204	0.337625	7.76128	8.41e-15	6.22e-14
GDPD3	70.7719	1.56016	0.201043	7.76036	8.47e-15	6.26e-14
PHYHIPL	418.657	1.99543	0.257179	7.7589	8.57e-15	6.32e-14
ADGRL1	485.298	1.85235	0.238762	7.75816	8.62e-15	6.36e-14
TFDP3	28.5775	7.67749	0.989734	7.75712	8.69e-15	6.41e-14
SERPINA11	9600.91	-1.96472	0.253295	-7.75664	8.72e-15	6.43e-14
ILDR2	305.357	2.27861	0.293829	7.75491	8.84e-15	6.52e-14
TTLL3	247.51	1.00397	0.129466	7.75473	8.85e-15	6.52e-14
CP	41114.5	-1.54286	0.198974	-7.75406	8.9e-15	6.55e-14
CAVIN4	16.9342	1.73734	0.224061	7.75388	8.91e-15	6.56e-14
GXYLT2	59.039	2.48629	0.320685	7.75307	8.97e-15	6.6e-14
SOSTDC1	26.7026	2.89595	0.373553	7.75245	9.01e-15	6.63e-14
MFAP3L	1140.41	-1.88008	0.242621	-7.74904	9.26e-15	6.8e-14
C1ORF61	20.4011	2.52421	0.326112	7.74033	9.92e-15	7.27e-14
PDGFRL	77.3574	1.58332	0.204615	7.73801	1.01e-14	7.4e-14
IL33	513.842	-1.65068	0.213368	-7.7363	1.02e-14	7.5e-14
KLK4	24.9698	5.53744	0.716284	7.73078	1.07e-14	7.81e-14
RGS9BP	3.79372	2.79276	0.36138	7.72806	1.09e-14	7.97e-14
GRIN2A	48.5029	3.21914	0.416634	7.72655	1.1e-14	8.06e-14
STRC	6.49796	2.96677	0.383993	7.72612	1.11e-14	8.08e-14
TTC9	970.45	1.8051	0.233649	7.7257	1.11e-14	8.1e-14
TBX20	2.33523	-2.79945	0.3626	-7.72049	1.16e-14	8.43e-14
CHRND	8.89036	4.43489	0.574486	7.71975	1.17e-14	8.48e-14
TDGF1	384.61	2.44371	0.31658	7.7191	1.17e-14	8.52e-14
BCAT1	251.684	1.41232	0.182984	7.71827	1.18e-14	8.57e-14
APOBEC3A	15.0541	-1.82706	0.236732	-7.71786	1.18e-14	8.59e-14
SLC22A4	98.6756	1.82029	0.235904	7.71625	1.2e-14	8.7e-14
LGALS14	12.6555	9.06888	1.17578	7.71305	1.23e-14	8.91e-14
LYG1	35.1259	1.16624	0.15125	7.71071	1.25e-14	9.07e-14
QDPR	5900.6	-1.06938	0.138716	-7.70911	1.27e-14	9.17e-14
AMH	28.0758	2.48403	0.322237	7.70869	1.27e-14	9.2e-14
MICB	196.877	1.26982	0.164757	7.70721	1.29e-14	9.3e-14
TTC39B	456.014	-1.15383	0.149715	-7.70687	1.29e-14	9.33e-14
DBNDD1	1545.07	1.59773	0.207426	7.70262	1.33e-14	9.63e-14
CNTNAP1	179.929	1.56342	0.202986	7.70213	1.34e-14	9.66e-14
ERRFI1	14971.1	-1.35326	0.175863	-7.69495	1.42e-14	1.02e-13
PFN4	25.0189	1.55451	0.202041	7.69405	1.43e-14	1.03e-13
CD81	25579	-1.02605	0.133397	-7.69171	1.45e-14	1.04e-13
TNNT1	44.8929	3.09297	0.402168	7.69074	1.46e-14	1.05e-13
CALML6	23.2266	1.81727	0.236354	7.68875	1.49e-14	1.07e-13
LY6E	8681.82	-1.97856	0.257399	-7.68672	1.51e-14	1.08e-13
SMYD2	2573.88	1.02062	0.132807	7.68495	1.53e-14	1.1e-13
HIC2	309.433	1.25702	0.163621	7.68253	1.56e-14	1.12e-13
OTOG	12.5902	4.84682	0.630948	7.6818	1.57e-14	1.12e-13
RDH5	435.365	-1.53537	0.199909	-7.68033	1.59e-14	1.14e-13
HP	511176	-1.99783	0.260167	-7.67905	1.6e-14	1.15e-13
KMO	1315.06	-1.79865	0.234316	-7.67617	1.64e-14	1.17e-13
DPF1	6.71251	2.19544	0.286049	7.67504	1.65e-14	1.18e-13
DRC1	7.86649	2.34367	0.305362	7.67506	1.65e-14	1.18e-13
ZNF738	58.4873	1.58352	0.206367	7.67333	1.68e-14	1.2e-13
SEMA4F	232.877	1.39272	0.181508	7.67305	1.68e-14	1.2e-13
NTN4	727.404	-1.27232	0.165928	-7.66792	1.75e-14	1.25e-13
HIST1H2AD	16.0816	2.03563	0.265476	7.66784	1.75e-14	1.25e-13
S100A1	284.195	1.98018	0.258264	7.6673	1.76e-14	1.25e-13
TUBB3	14.2586	2.64978	0.345615	7.66686	1.76e-14	1.25e-13
PPFIA4	31.6649	2.43715	0.317942	7.66538	1.78e-14	1.27e-13
MIP	20.6014	-1.67769	0.218916	-7.66364	1.81e-14	1.28e-13
SERPINA12	120.554	2.48591	0.324538	7.65985	1.86e-14	1.32e-13
WISP3	15.5231	-1.47649	0.192776	-7.65908	1.87e-14	1.33e-13
PCK1	48567.9	-2.22381	0.290384	-7.65816	1.89e-14	1.34e-13
ANKRD33	20.7943	4.34211	0.567004	7.658	1.89e-14	1.34e-13
AMHR2	10.1482	-2.95763	0.386221	-7.65785	1.89e-14	1.34e-13
RPL22L1	1964.85	1.46522	0.191539	7.6497	2.01e-14	1.43e-13
KCNJ6	20.2824	3.52307	0.460671	7.64768	2.05e-14	1.45e-13
SLC5A11	119.838	2.38468	0.311993	7.64337	2.12e-14	1.5e-13
HAAO	7600.8	-1.35901	0.177816	-7.64276	2.13e-14	1.5e-13
CNTD1	33.4704	1.02374	0.134024	7.63851	2.2e-14	1.55e-13
MAFF	1327.84	-1.23359	0.161565	-7.63525	2.25e-14	1.59e-13
PRR19	69.4949	2.01049	0.263329	7.6349	2.26e-14	1.59e-13
RCVRN	1.34718	-1.98276	0.25985	-7.6304	2.34e-14	1.65e-13
SLCO6A1	11.5991	5.52241	0.723925	7.62843	2.38e-14	1.67e-13
FCAR	5.58303	-2.09223	0.274354	-7.62603	2.42e-14	1.7e-13
A1CF	9208	-1.0083	0.132297	-7.62147	2.51e-14	1.76e-13
COLEC12	153.029	2.11384	0.277484	7.61786	2.58e-14	1.81e-13
TMC2	2.75722	2.86444	0.376041	7.61736	2.59e-14	1.81e-13
STAB1	2802.61	-1.09577	0.143859	-7.61696	2.6e-14	1.82e-13
OR51E2	5.20444	3.03954	0.399147	7.61509	2.64e-14	1.84e-13
GRIN2C	25.7628	1.20426	0.158146	7.61486	2.64e-14	1.85e-13
NADK2	9840.1	-1.04557	0.137341	-7.61297	2.68e-14	1.87e-13
TMPRSS2	1912.04	-1.28452	0.16885	-7.60745	2.8e-14	1.95e-13
IGFBP4	46527.6	-1.03704	0.136414	-7.60214	2.91e-14	2.03e-13
PPM1K	454.556	-1.28067	0.168506	-7.60013	2.96e-14	2.06e-13
AC009690.1	12.9352	2.26174	0.297676	7.59801	3.01e-14	2.09e-13
THBS1	6056.85	-1.66038	0.218631	-7.59443	3.09e-14	2.15e-13
ZNF57	155.747	1.1872	0.156326	7.59438	3.09e-14	2.15e-13
FNIP2	2194.55	-1.2645	0.166516	-7.59387	3.11e-14	2.16e-13
BPIFB2	301.412	3.55957	0.468774	7.59337	3.12e-14	2.16e-13
RNF165	79.2461	-1.75789	0.231511	-7.59313	3.12e-14	2.17e-13
BORA	71.1526	1.02978	0.135668	7.5904	3.19e-14	2.21e-13
MSC	659.142	2.46268	0.324724	7.58391	3.35e-14	2.32e-13
CHST6	9.61641	2.51373	0.331456	7.58392	3.35e-14	2.32e-13
CAPN8	52.0693	2.02945	0.267656	7.58231	3.39e-14	2.35e-13
FGL2	831.426	-1.29231	0.170466	-7.58103	3.43e-14	2.37e-13
ATP6V0D2	38.4588	2.4992	0.329684	7.58059	3.44e-14	2.37e-13
SIGLEC1	572.641	-1.35397	0.178756	-7.57441	3.61e-14	2.49e-13
SLC25A47	8632.38	-2.6326	0.347609	-7.57344	3.63e-14	2.5e-13
NT5M	132.779	1.29315	0.170753	7.57323	3.64e-14	2.51e-13
DRGX	8.03207	4.40933	0.582361	7.57147	3.69e-14	2.54e-13
PRAMEF4	28.5916	4.70978	0.622383	7.56733	3.81e-14	2.62e-13
PPEF1	7.65288	2.34831	0.310364	7.56632	3.84e-14	2.64e-13
ENTPD2	203.153	1.68022	0.222069	7.56619	3.84e-14	2.64e-13
CST2	17.5979	3.10191	0.409968	7.56624	3.84e-14	2.64e-13
GYS2	2801.81	-2.1723	0.287335	-7.56016	4.03e-14	2.76e-13
UGT1A10	33.7606	4.38454	0.580003	7.55951	4.05e-14	2.77e-13
FAM78B	116.656	1.2727	0.168506	7.55283	4.26e-14	2.92e-13
PPP1R16A	4728.98	1.171	0.155126	7.54875	4.39e-14	3e-13
MAG	7.03072	-2.90826	0.385343	-7.5472	4.45e-14	3.03e-13
ALDOA	18315.2	1.13031	0.149788	7.5461	4.48e-14	3.06e-13
UPK1A	17.3896	2.6254	0.347948	7.54536	4.51e-14	3.07e-13
BMP10	11.0796	-4.95805	0.657209	-7.5441	4.55e-14	3.1e-13
CUZD1	13.5588	1.57088	0.208277	7.54226	4.62e-14	3.14e-13
KCTD17	556.845	1.6937	0.224583	7.54153	4.64e-14	3.16e-13
POU3F2	7.59929	3.28316	0.435343	7.54154	4.64e-14	3.16e-13
MYEF2	134.508	2.31129	0.3065	7.54093	4.67e-14	3.17e-13
C15ORF48	303.025	2.29751	0.304828	7.53709	4.81e-14	3.26e-13
NTS	931.086	4.15745	0.551736	7.53522	4.88e-14	3.31e-13
NAV3	257.181	2.25503	0.299442	7.53076	5.04e-14	3.42e-13
PLAG1	110.183	1.83904	0.244256	7.52917	5.11e-14	3.46e-13
CDX2	7.76257	3.98412	0.529322	7.52685	5.2e-14	3.52e-13
TFPI2	141.806	-1.98604	0.263909	-7.52546	5.25e-14	3.55e-13
CD1D	338.187	-1.58887	0.211157	-7.52456	5.29e-14	3.57e-13
KIF21B	470.793	1.50589	0.200153	7.52372	5.32e-14	3.6e-13
C4ORF48	83.0103	1.94939	0.259213	7.52043	5.46e-14	3.69e-13
COL8A1	297.877	1.67162	0.22229	7.52001	5.48e-14	3.69e-13
CD14	20362.5	-1.41251	0.187849	-7.51936	5.5e-14	3.71e-13
SRXN1	166.095	1.38952	0.184818	7.51832	5.55e-14	3.74e-13
TMEM71	32.1769	-1.12146	0.149315	-7.51071	5.88e-14	3.96e-13
ADH1A	24506.7	-1.78716	0.238039	-7.50784	6.01e-14	4.04e-13
HIST1H2AL	2.31293	2.90065	0.386553	7.5039	6.19e-14	4.15e-13
INAVA	295.575	2.40911	0.321056	7.5037	6.2e-14	4.16e-13
EDARADD	69.0253	2.22504	0.296829	7.49604	6.58e-14	4.4e-13
AGXT2	2376.94	-1.78613	0.238433	-7.4911	6.83e-14	4.57e-13
BCAS1	139.449	2.45734	0.328104	7.48951	6.91e-14	4.62e-13
PDGFRB	2970.27	1.15812	0.154766	7.48305	7.26e-14	4.85e-13
CDC25B	2334.93	1.02793	0.13739	7.48185	7.33e-14	4.89e-13
SOX2	20.8228	3.91224	0.522997	7.48043	7.41e-14	4.94e-13
MNX1	29.4004	4.80763	0.643042	7.47639	7.64e-14	5.09e-13
ACSM5	5308.49	-1.85152	0.247894	-7.46901	8.08e-14	5.37e-13
LINC00672	22.7836	1.38622	0.185596	7.46901	8.08e-14	5.37e-13
ADH6	12559.7	-1.52465	0.204271	-7.46385	8.4e-14	5.57e-13
SPAG4	276.759	1.43188	0.191861	7.4631	8.45e-14	5.6e-13
RGS20	8.04466	2.58908	0.346956	7.46229	8.5e-14	5.64e-13
PTH2R	232.249	3.57423	0.47906	7.46093	8.59e-14	5.69e-13
KLHL23	660.418	1.00451	0.134637	7.46089	8.59e-14	5.69e-13
GOT2	13498.2	-1.00013	0.134112	-7.45743	8.82e-14	5.84e-13
AVPI1	1266.22	-1.0307	0.138273	-7.45413	9.05e-14	5.98e-13
UCN	56.8538	1.35919	0.182347	7.45384	9.07e-14	5.99e-13
PLA2G1B	60.9831	2.00344	0.268861	7.45157	9.22e-14	6.09e-13
C5ORF30	155.296	1.70498	0.228967	7.44641	9.59e-14	6.33e-13
SLC19A3	805.243	-1.47885	0.198653	-7.44439	9.74e-14	6.42e-13
CRLF1	60.9353	1.55004	0.20824	7.44355	9.8e-14	6.46e-13
SELENOM	1809.01	1.81174	0.243447	7.44205	9.91e-14	6.53e-13
TMC5	380.102	2.78925	0.374855	7.44087	1e-13	6.59e-13
ADGRG6	3016.94	-1.34118	0.180327	-7.43749	1.03e-13	6.75e-13
CYP27B1	49.9186	1.65912	0.223093	7.43687	1.03e-13	6.78e-13
MFSD6	481.461	1.17766	0.158367	7.43631	1.04e-13	6.81e-13
ADH4	43161.5	-2.36317	0.31783	-7.43531	1.04e-13	6.85e-13
ARHGEF26	1235.69	-1.28317	0.172593	-7.43463	1.05e-13	6.89e-13
KISS1	104.353	1.77639	0.238979	7.43326	1.06e-13	6.95e-13
KCNJ11	135.148	1.73718	0.233719	7.43279	1.06e-13	6.97e-13
FGB	383674	-1.57856	0.212403	-7.43189	1.07e-13	7.02e-13
HGF	569.658	-2.04468	0.275138	-7.43145	1.07e-13	7.04e-13
ITGB1BP2	38.7483	1.35452	0.182469	7.42327	1.14e-13	7.48e-13
SHC3	48.1631	1.71828	0.231527	7.4215	1.16e-13	7.57e-13
SLC9A9	204.491	-1.19604	0.161196	-7.41981	1.17e-13	7.67e-13
TLR3	390.945	-1.18292	0.159475	-7.4176	1.19e-13	7.79e-13
PLEKHG4B	40.0996	2.87386	0.38749	7.4166	1.2e-13	7.84e-13
SHISA2	17.9862	2.42737	0.327313	7.41604	1.21e-13	7.87e-13
TNFSF15	102.16	1.87626	0.253026	7.41529	1.21e-13	7.92e-13
C19ORF67	4.5843	2.65761	0.358491	7.41332	1.23e-13	8.02e-13
CTXN1	33.5636	2.10962	0.284797	7.40746	1.29e-13	8.36e-13
APOBEC3B	172.38	1.8815	0.254073	7.40534	1.31e-13	8.49e-13
MMP14	3811.92	1.34201	0.181273	7.40326	1.33e-13	8.61e-13
C1ORF162	379.511	-1.1931	0.161226	-7.40019	1.36e-13	8.8e-13
CNNM1	272.142	2.62116	0.354304	7.39805	1.38e-13	8.93e-13
MT3	26.6073	3.65604	0.494322	7.39608	1.4e-13	9.06e-13
RNF224	4.74889	2.9057	0.393004	7.39355	1.43e-13	9.23e-13
CD226	81.4937	-1.4282	0.193197	-7.39244	1.44e-13	9.31e-13
CKB	2636.35	2.08094	0.281505	7.39221	1.44e-13	9.32e-13
EGFL8	36.1832	1.17792	0.159356	7.39176	1.45e-13	9.35e-13
PGGHG	2691.62	1.67349	0.226447	7.39021	1.47e-13	9.45e-13
B3GALT1	16.9532	3.82036	0.516991	7.38961	1.47e-13	9.49e-13
FBXL16	141.511	2.3888	0.323284	7.38915	1.48e-13	9.52e-13
ADGRB2	32.1827	2.0438	0.276702	7.38628	1.51e-13	9.72e-13
ORM2	42906.7	-1.54584	0.209361	-7.38362	1.54e-13	9.91e-13
DHDH	23.2508	2.00901	0.272114	7.38299	1.55e-13	9.95e-13
PINK1	1775.04	-1.01843	0.137944	-7.38287	1.55e-13	9.96e-13
MT1E	10027	-2.55806	0.346693	-7.37846	1.6e-13	1.03e-12
TRIM46	25.0217	1.71522	0.232675	7.37175	1.68e-13	1.08e-12
TSPAN5	369.592	2.03454	0.276184	7.3666	1.75e-13	1.12e-12
RTEL1-TNFRSF6B	54.9371	1.06871	0.145099	7.36541	1.77e-13	1.13e-12
ZFPM2	90.8996	-1.35248	0.183647	-7.36457	1.78e-13	1.14e-12
HS6ST2	87.5168	3.49192	0.47444	7.36007	1.84e-13	1.18e-12
AQP10	21.1436	4.00188	0.543998	7.35643	1.89e-13	1.21e-12
DTX1	1054.55	-1.82367	0.24793	-7.3556	1.9e-13	1.21e-12
ADM	1007.27	-1.33015	0.180894	-7.35323	1.93e-13	1.23e-12
PRKAA2	588.833	1.85223	0.251903	7.35292	1.94e-13	1.24e-12
RASGRP4	53.4347	-1.04372	0.141982	-7.35112	1.97e-13	1.25e-12
SMC4	765.324	1.25428	0.170663	7.34945	1.99e-13	1.27e-12
ZEB2	631.77	-1.15323	0.156914	-7.34946	1.99e-13	1.27e-12
AZGP1	47186.7	-1.55974	0.212333	-7.3457	2.05e-13	1.3e-12
ARID3C	191.606	-1.57855	0.214896	-7.34566	2.05e-13	1.3e-12
SH3D21	79.9391	1.19955	0.163416	7.34046	2.13e-13	1.35e-12
TEX45	11.4349	2.13878	0.291444	7.33857	2.16e-13	1.37e-12
BEX2	330.896	2.58991	0.352932	7.33826	2.16e-13	1.37e-12
DHTKD1	7541.09	-1.04691	0.142673	-7.33781	2.17e-13	1.38e-12
FERMT1	211.267	2.20625	0.300675	7.33768	2.17e-13	1.38e-12
CDNF	118.927	-1.00732	0.137284	-7.33751	2.18e-13	1.38e-12
RDH8	6.51718	4.27819	0.583134	7.33655	2.19e-13	1.39e-12
MDGA1	248.613	1.99393	0.271997	7.33073	2.29e-13	1.45e-12
LYZ	12925	2.18167	0.29768	7.32892	2.32e-13	1.46e-12
GPR137C	80.3093	1.22201	0.1668	7.32616	2.37e-13	1.49e-12
CISH	1814.27	-1.20832	0.164983	-7.32394	2.41e-13	1.52e-12
GDF2	140.124	-4.7464	0.648097	-7.32359	2.41e-13	1.52e-12
LOX	388.972	1.63105	0.222875	7.31825	2.51e-13	1.58e-12
PRDM12	8.13281	1.8566	0.253707	7.3179	2.52e-13	1.58e-12
SLC38A4	14929.6	-1.50482	0.205697	-7.31571	2.56e-13	1.61e-12
BICD1	153.299	1.20754	0.165077	7.31505	2.57e-13	1.62e-12
GCM1	4.80826	3.32152	0.454195	7.31298	2.61e-13	1.64e-12
CSF3	2.45722	-2.88298	0.394362	-7.31049	2.66e-13	1.67e-12
NAALADL1	224.913	1.91142	0.261607	7.30647	2.74e-13	1.72e-12
LPIN2	8972.72	-1.06219	0.145451	-7.30275	2.82e-13	1.76e-12
LDHD	4580.64	-1.30778	0.179113	-7.30141	2.85e-13	1.78e-12
GAS2L3	242.934	1.15681	0.158565	7.29551	2.98e-13	1.86e-12
TMEM151B	1.80039	2.56441	0.351582	7.2939	3.01e-13	1.88e-12
MYCBPAP	9.64626	1.8047	0.247488	7.29205	3.05e-13	1.9e-12
BMP7	26.1663	3.946	0.541187	7.29138	3.07e-13	1.91e-12
SH2D4B	3.38823	2.77955	0.381481	7.28619	3.19e-13	1.99e-12
ZNF541	71.448	2.0881	0.286799	7.28072	3.32e-13	2.06e-12
SPATA22	1.53036	-2.69874	0.370897	-7.27625	3.43e-13	2.13e-12
CARD18	5.85016	4.59372	0.631488	7.27443	3.48e-13	2.16e-12
DUOX2	492.332	3.16045	0.434622	7.27172	3.55e-13	2.2e-12
HIST1H2BO	8.82768	1.96913	0.270822	7.27095	3.57e-13	2.21e-12
PSAT1	4450.24	-1.29573	0.178215	-7.27062	3.58e-13	2.22e-12
ESYT3	46.9183	1.97971	0.27234	7.26927	3.61e-13	2.24e-12
RDH16	10655.2	-2.0079	0.276238	-7.26873	3.63e-13	2.25e-12
[truncated: 2,499 more rows]

## Sheet: network pharmacology
target point		TCMSP：	PTGS1	Swiss：	CYP19A1	DurgBank	TTGR
PTGS1			ESR1		CA7		AKR1C1
ESR1			HSP90AB1		ABCC1		CYP1B1
HSP90AB1			penA		HSD17B1		KANSL3
penA			PRKACA		CA12		SHBG
PRKACA			PIK3CG		SHBG		CYP19A1
PIK3CG			RELA		CA4		ESR2
RELA			AKT1		CYP1B1
AKT1			BCL2		CBR1
BCL2			MPK3		ESR1
MPK3			MAPK1		ESR2
MAPK1			CASP3		PTGS1
CASP3			FASN		MAOB
FASN			LDLR		ADORA1
LDLR			BAD		ADORA3
BAD			SOD1		ABCG2
SOD1			CAT		TAS2R31
CAT			PPARG		AKR1C3
PPARG			MTTP		PLA2G1B
MTTP			APOB		GRM5
APOB			PLB1		CES1
PLB1			HMGCR		PPARG
HMGCR			Cyp19a1		CES2
Cyp19a1			GSTP1		SLC5A2
GSTP1			B3GAT1		MMP12
B3GAT1			PPARA		POLB
PPARA			SREBF1		MMP13
SREBF1			GSR		PLA2G2A
GSR			ABCC1		PLA2G5
ABCC1			ADIPOQ		PLA2G10
ADIPOQ			SOAT2		BACE1
SOAT2			AKR1C1		CHRNA7
AKR1C1			GOT1		KLK1
GOT1			ABAT		KLK2
ABAT			CES1		RXRA
CES1			SOAT1		SERPINE1
SOAT1			CYP19A1		SRC
CYP19A1					CA2
CA7					CA1
ABCC1					HSD17B14
HSD17B1					KIT
CA12					KDR
SHBG					FGFR1
CA4					MET
CYP1B1					CA3
CBR1					CA6
ESR1					CA13
ESR2					CA5B
PTGS1					CA5A
MAOB					NQO2
ADORA1					CTSB
ADORA3					NOX4
ABCG2					AKR1B1
TAS2R31					CLK1
AKR1C3					DYRK1B
PLA2G1B					BCHE
GRM5					CA9
CES1					ESRRA
PPARG					ESRRB
CES2					CDK5R1 CDK5
SLC5A2					IGF1R
MMP12					INSR
POLB					DYRK1A
MMP13					HSD17B2
PLA2G2A					IGFBP3
PLA2G5					MMP2
PLA2G10					YWHAG
BACE1					SIRT2
CHRNA7					F3
KLK1					PTGER1
KLK2					PTGER2
RXRA					PTGER3
SERPINE1					BCL2L1
SRC					PIK3CB
CA2					CYP2C9
CA1					CYP3A4
HSD17B14					PIK3CA
KIT					VCP
KDR					PGF
FGFR1					VEGFA
MET					EDNRA
CA3					ERN1
CA6					MMP3
CA13					APP
CA5B					GSK3B
CA5A					BCL2
NQO2					MMP9
CTSB					WEE1
NOX4					LCK
AKR1B1					SYK
CLK1					CCNE1 CDK2
DYRK1B					CCNE1 CDK3
BCHE					CDK4
CA9					AURKA
ESRRA					SNCA
ESRRB					ALOX12
CDK5R1 CDK5					HNF4A
IGF1R					CDK1 CCNB1
INSR					GRK2
DYRK1A					DUSP3
HSD17B2
IGFBP3
MMP2
YWHAG
SIRT2
F3
PTGER1
PTGER2
PTGER3
BCL2L1
PIK3CB
CYP2C9
CYP3A4
PIK3CA
VCP
PGF
VEGFA
EDNRA
ERN1
MMP3
APP
GSK3B
BCL2
MMP9
WEE1
LCK
SYK
CCNE1 CDK2
CCNE1 CDK3
CDK4
AURKA
SNCA
ALOX12
HNF4A
CDK1 CCNB1
GRK2
DUSP3
TTGR
AKR1C1
CYP1B1
KANSL3
SHBG
CYP19A1
ESR2
